# Supplementary material for: Spatial transcriptomics reveals antiparasitic targets associated with essential behaviors in the human parasite Brugia malayi
Source: bioRxiv preprint, doi:10.1101/2021.08.24.456436, version 1 (2021-08-25)
Supplement: Supplementary Table 4 [file 456436_file16.csv]

gene_id	protein_id	gene_name	TM	Pharynx_1	NPharynx_1	NPharynx_2	Pharynx_2	NPharynx_3	Pharynx_3	mean.pharynx.tpm	mean.npharynx.tpm	high.pharynx	ph.enrch	prioritize
WBGene00268435	Bm17292	Bm17292	0	0	0	0	0	0	0	0	0	no	1	no
WBGene00268436	Bm17293	Bm17293	2	0	0	0	0	0	0	0	0	no	1	no
WBGene00268437	Bm17294a	Bm17294a	0	0	0	0	0	0	0	0	0	no	1	no
WBGene00269604	NA	NA	NA	0	0	0	0	0	0	0	0	no	1	no
WBGene00269605	NA	NA	NA	0	0	0	0	0	0	0	0	no	1	no
WBGene00269606	NA	NA	NA	0	0	0	0	0	0	0	0	no	1	no
WBGene00268306	Bm17163	Bm17163	0	0	0	0	0	0	0	0	0	no	1	no
WBGene00269607	NA	NA	NA	0	0	0	0	1.12051692142322	0	0	0.373505640474405	no	0.728063992263332	no
WBGene00269608	NA	NA	NA	0	0	0	0	0	0	0	0	no	1	no
WBGene00234803	NA	NA	NA	0	0	0	0	0	0	0	0	no	1	no
WBGene00269609	NA	NA	NA	0	0	0	0	0	0	0	0	no	1	no
WBGene00268307	Bm17164	Bm17164	0	0	0	0	0	0	0	0	0	no	1	no
WBGene00236064	NA	NA	NA	0	0	0	0	0	0	0	0	no	1	no
WBGene00236069	NA	NA	NA	0	0	0	0	0	0	0	0	no	1	no
WBGene00236063	NA	NA	NA	0	0	0	0	0	0	0	0	no	1	no
WBGene00236066	NA	NA	NA	0	0	0	0	0	0	0	0	no	1	no
WBGene00236062	NA	NA	NA	0	0	0	0	0	0	0	0	no	1	no
WBGene00235749	NA	NA	NA	0	0	0	0	0	0	0	0	no	1	no
WBGene00268418	Bm17275	Bm17275	1	0	0	0	0	0	0	0	0	no	1	no
WBGene00268445	Bm17302	Bm17302	0	0	0	0	0	0	0	0	0	no	1	no
WBGene00268352	Bm17209	Bm17209	0	0	0	0	0	0	0	0	0	no	1	no
WBGene00268353	Bm17210	Bm17210	0	0	0	0	0	0	0	0	0	no	1	no
WBGene00268354	Bm17211	Bm17211	0	0	0	0	0	0	0	0	0	no	1	no
WBGene00268446	Bm17303	Bm17303	0	0	0	0	0	0	0	0	0	no	1	no
WBGene00221383	Bm1122	Bm1122	1	0	0	0	0	0	0	0	0	no	1	no
WBGene00268274	Bm17130	Bm17130	0	0	0	0	0	0	0	0	0	no	1	no
WBGene00228675	Bm8414a	Bm8414a	0	0	0	0	0	0	0	0	0	no	1	no
WBGene00228674	Bm8413	Bm8413	2	0	0	0	0	0	0	0	0	no	1	no
WBGene00228673	Bm8412a	Bm8412a	1	0	0	0	0	0	0	0	0	no	1	no
WBGene00228672	Bm8411	Bm8411	0	0	0	0	0	0	0	0	0	no	1	no
WBGene00233616	Bm13355	Bm13355	0	0	0	0	0	0	0	0	0	no	1	no
WBGene00228668	Bm8407a	Bm8407a	2	0	0	0	0	0	0	0	0	no	1	no
WBGene00268276	Bm17132	Bm17132	0	0	0	0	0	0	0	0	0	no	1	no
WBGene00228669	Bm8408	Bm8408	0	0	0	0	0	0	0	0	0	no	1	no
WBGene00224507	Bm4246	Bm4246	0	0	0	0	0	0	6.87104364529173	2.29034788176391	0	no	3.29034788176391	no
WBGene00228670	Bm8409	Bm8409	1	0	0	0	0	0	0	0	0	no	1	no
WBGene00235828	NA	NA	NA	0	0	0	0	0	0	0	0	no	1	no
WBGene00235825	NA	NA	NA	0	0	0	0	0	0	0	0	no	1	no
WBGene00235446	NA	NA	NA	0	0	0	0	0	0	0	0	no	1	no
WBGene00235826	NA	NA	NA	0	0	0	0	0	0	0	0	no	1	no
WBGene00235824	NA	NA	NA	0	0	0	0	0	0	0	0	no	1	no
WBGene00268733	Bm17590	Bm17590	0	108.240232628567	0.638717536641945	0	203.502950671608	19.8143770612878	145.185652717267	152.309612005814	6.81769819930991	no	19.6105820533398	no
WBGene00235533	NA	NA	NA	0	0	0	0	0	0	0	0	no	1	no
WBGene00226065	Bm5804	Bma-dmsr-2	5	0	0	0	0.692681164455143	0.233186824543004	2.16426097478235	0.952314046412498	0.0777289415143348	no	1.81150748690971	no
WBGene00268734	Bm17591	Bm17591	0	0	0	0	2.99346918913556	0	0	0.997823063045187	0	no	1.99782306304519	no
WBGene00233037	Bm12776	Bm12776	0	0	0	0	13.7125983813695	1.15406533224427	5.35557393909465	6.35605744015471	0.384688444081423	no	5.31242784006519	no
WBGene00227546	Bm7285	Bma-let-630	0	0	0	0	9.51031221881448	0.933796416953488	3.714334720175	4.40821564632983	0.311265472317829	no	4.12442465732749	no
WBGene00224343	Bm4082	Bm4082	0	14.4988630514598	0	0	10.0466308952617	2.00814329542696	1.96189930974238	8.83579775215462	0.669381098475654	no	5.89188278286839	no
WBGene00226430	Bm6169a	Bma-snf-1	13	13.4837269983476	0.965863942844451	0	11.3989617987201	2.03861338478159	16.3238648986695	13.7355178985791	1.00149244254201	no	7.36226507049114	no
WBGene00221963	Bm1702a	Bma-xnp-1	0	31.5098784047856	0.770064793537935	0	99.4037056482199	8.78721533032908	55.4135157732918	62.1090332754324	3.18576004128901	no	15.0770786315782	no
WBGene00225012	Bm4751	Bma-axl-1	0	11.6624070464654	77.7778640296424	0	22.7283142558429	2.29540387432263	10.2575659653943	14.8827624225675	26.6910893013217	no	0.573569434186522	no
WBGene00268735	Bm17592	Bm17592	0	0	0	0	4.20698823580289	1.18021378129083	4.38153507815704	2.86284110465331	0.393404593763611	no	2.77223221592783	no
WBGene00233039	Bm12778	Bm12778	2	0	0	0	3.31884627491116	0	0	1.10628209163705	0	no	2.10628209163705	no
WBGene00227415	Bm7154a	Bma-clp-1	0	33.5871396667419	0	0	40.7284205153189	6.20258191693596	26.511395023509	33.6089850685232	2.06752730564532	no	11.2823722888564	no
WBGene00221870	Bm1609a	Bm1609a	0	0	0	0	6.13393909738046	1.37663507489138	0	2.04464636579349	0.458878358297126	no	2.08697753892747	no
WBGene00222042	Bm1781	Bm1781	0	0	6.51703986840073	0	7.72671085512848	0.650287340311406	4.526600663832	4.08443717298683	2.38910906957071	no	1.50022825132354	no
WBGene00226981	Bm6720	Bm6720	11	0	31.9695729616843	0	16.0168136365708	1.88718639397594	8.75770720028207	8.25817361228427	11.2855864518867	no	0.753580111827911	no
WBGene00226295	Bm6034a	Bma-usp-5	0	25.8029875711304	146.999366775749	0	26.4677464957687	3.66172724163635	14.1605580720204	22.1437640463065	50.2203646724618	no	0.45184692054232	no
WBGene00234299	Bm14038a	Bma-hint-1	0	0	482.372011422208	0	1.44388646260322	5.10379208093399	2.2556894018381	1.23319195481377	162.491934501047	no	0.0136593402092228	no
WBGene00224015	Bm3754	Bma-cpz-1	1	9.14593388777356	867.718212773059	0	45.3901034656968	8.74920245806925	30.8801571500994	28.4720648345233	292.155805077043	no	0.100533792352425	no
WBGene00222656	Bm2395	Bma-dcp-66	0	11.3018203774381	0	0	14.0902673669683	1.524664688863	5.24102459905541	10.2110374478206	0.508221562954333	no	7.43328283005065	no
WBGene00223172	Bm2911	Bma-ptr-21	12	17.8701448943566	0	0	24.6116690049592	1.65707319224834	12.5833748986173	18.3550629326444	0.552357730749448	no	12.4681718325969	no
WBGene00234610	Bm14349	Bm14349	0	0	97.441222709434	0	0	1085.73784251433	0	0	394.393021741255	no	0.00252912910702405	no
WBGene00231492	Bm11231	Bma-hum-7	0	5.39069251284274	1.47671338634529	0	4.86898193735971	202.32796375244	4.37373295063255	4.877802466945	67.9348923795953	no	0.0852659990325136	no
WBGene00231518	Bm11257	Bm11257	1	9.16110614000326	1.95364282267571	0	10.648929708973	1.19496541412399	7.30981317185525	9.03994967361052	1.04953607893323	no	4.89864500401292	no
WBGene00226306	Bm6045a	Bm6045a	0	0	0	0	41.9834053776262	65.5278295648296	11.9250779710508	17.969494449559	21.8426098549432	no	0.83044339372867	no
WBGene00226851	Bm6590	Bm6590	0	0	17.1878771167721	0	5.09455824179912	84.8950484449144	3.97944759879335	3.02466861353082	34.0276418538955	no	0.114899787725311	no
WBGene00225498	Bm5237a	Bm5237a	0	0	446.5549067116	0	5.39332060689756	0.363125596768334	3.37025284155933	2.92119114948563	148.972677436123	no	0.0261460368416491	no
WBGene00224449	Bm4188	Bm4188	0	15.5565422517432	0	0	24.9048823239663	3.98243534443835	13.6175441757513	18.0263229171536	1.32747844814612	no	8.17465052460891	no
WBGene00232354	Bm12093a	Bma-agef-1	0	1.92977674520661	0	0	8.3762866384924	0.643655712496923	4.55155647750029	4.9525399537331	0.214551904165641	no	4.90101734912869	no
WBGene00226051	Bm5790	Bm5790	1	5.67066029751352	0	0	9.53222646649411	0.840443217178483	4.25473545052356	6.48587407151039	0.280147739059494	no	5.84766417430082	no
WBGene00234611	Bm14350	Bm14350	0	0	644.563008660474	0	13.3294757257783	0	0	4.44315857525942	214.854336220158	no	0.0252168136650622	no
WBGene00224132	Bm3871a	Bma-rbpl-1	1	8.46923107875642	55.9907194130457	0	28.9110167871557	4.95098968640263	20.030046432877	19.136764766263	20.3139030331495	no	0.94477134173616	no
WBGene00233041	Bm12780	Bm12780	0	8.65350308558853	0	0	9.697536302372	1.16593412271502	14.0676963360853	10.8062452413486	0.388644707571674	no	8.50199131352628	no
WBGene00227389	Bm7128	Bma-abtm-1	6	6.14047675487351	0	0	3.44065840476946	0.744606222091924	2.30362098603685	3.96158538189327	0.248202074030641	no	3.97498568951382	no
WBGene00227387	Bm7126	Bm7126	4	0	0	0	0	0	0	0	0	no	1	no
WBGene00222374	Bm2113a	Bm2113a	5	0	0	0	4.44660957221108	0	8.68330920222142	4.3766395914775	0	no	5.3766395914775	no
WBGene00268736	Bm17593	Bm17593	0	65.4147502633916	0	0	0	1.03896986784255	0	21.8049167544639	0.34632328928085	no	16.9386631992716	no
WBGene00225307	Bm5046	Bma-pqn-52	0	0	0	0	5.72024295509252	0.481421091968675	4.46818075518138	3.39614123675797	0.160473697322892	no	3.78822996755503	no
WBGene00224160	Bm3899a	Bm3899a	0	10.7590685744281	0	0	21.3196760115839	1.59491931242034	13.2167998792494	15.0985148217538	0.531639770806778	no	10.5106403794112	no
WBGene00235414	NA	NA	NA	0	0	0	0	10.2788752258556	0	0	3.42629174195188	no	0.225922749402647	no
WBGene00226167	Bm5906	Bma-pash-1	0	0	0	0	13.6522590556317	1.91497852859269	15.2343082667788	9.62885577413685	0.638326176197564	no	6.48763105208125	no
WBGene00226593	Bm6332	Bm6332	1	0	0	0	2.38624931888368	0.267772018735385	2.48525417944788	1.62383449944385	0.0892573395784615	no	2.40882884521969	no
WBGene00223178	Bm2917	Bm2917	0	6.55406213080314	2.83685309608559	0	10.4925724155267	1.50121029930881	6.55674390160866	7.8677928159795	1.44602113179813	no	3.62539501425344	no
WBGene00234322	Bm14061	Bma-rpl-27	0	0	375.91111482487	0	1.13591464766305	0.764797263828544	0	0.378638215887682	125.5586373629	no	0.0108932763864588	no
WBGene00225299	Bm5038	Bma-egl-30	0	0	0	0	1.33537658994895	0.0561932824505556	1.56462864260452	0.966668410851155	0.0187310941501852	no	1.93050788588301	no
WBGene00225298	Bm5037a	Bm5037a	1	14.5738569541292	9.48937952200615	0	4.66633505794947	0.785446400345565	7.28991011984763	8.84336737730878	3.42494197411724	no	2.22451897333015	no
WBGene00233043	Bm12782	Bma-let-391	0	5.58418599809441	0.706175279237125	0	25.8191883466973	3.7250870871428	14.8171700514666	15.4068481320861	1.47708745545998	no	6.6234432280226	no
WBGene00224055	Bm3794a	Bma-twk-47	5	6.48726873769535	306.392740853895	0	21.4247895052405	2.78197304629212	16.2571231361558	14.7230604596972	103.058237966729	no	0.151098661354658	no
WBGene00224891	Bm4630	Bma-pdi-3	1	9.30120554945892	33.306166716015	411.090463593057	31.4195789825363	2.7121042812284	14.473709410774	18.3981646475897	149.036244863434	no	0.129289857029189	no
WBGene00224892	Bm4631a	Bma-chd-1	2	3.12340699455834	4.99912216734313	0	12.3783996199389	1.01697365892877	9.6689821386898	8.39026291772903	2.00536527542397	no	3.12449970541579	no
WBGene00223651	Bm3390	Bma-ubql-1	0	32.5162947923502	38.9073076839535	0	40.6644752079598	650.556206620457	28.5516631389882	33.9108110464328	229.821171434803	no	0.151246139292268	no
WBGene00234614	Bm14353	Bm14353	0	0	0	0	0.777062751845505	0.130796681699893	0	0.259020917281835	0.0435988938999645	no	1.20642224195623	no
WBGene00223649	Bm3388	Bma-sem-4	0	12.2975643692388	0	0	28.0853493115766	1.94034231679729	22.9202487087741	21.1010541298632	0.646780772265765	no	13.4207628010223	no
WBGene00227514	Bm7253	Bm7253	0	17.8898790949927	0	0	24.1875618182915	1.81642457070491	13.9519924263187	18.6764777798676	0.605474856901636	no	12.2558616818458	no
WBGene00233045	Bm12784	Bma-men-1.1	0	5.10227950792861	0	0	4.492606246937	0.137491642935469	0.63804590535317	3.41097722007292	0.0458305476451562	no	4.21767869565954	no
WBGene00255599	Bm16945	Bm16945	0	30.4311878968254	1.9241616072505	0	86.1443484522396	6.76665767219336	103.176223197806	73.2505865156237	2.89693975981462	no	19.0535628190352	no
WBGene00255618	NA	NA	NA	0	0	0	0	0	0	0	0	no	1	no
WBGene00233046	Bm12785	Bm12785	0	32.2752343992711	0	0	5.51501502148076	0.214222575566647	1.9882493838358	13.2594996015292	0.0714075251888822	no	13.3091277280467	no
WBGene00226180	Bm5919a	Bm5919a	0	0	8.14209235938517	0	5.21093139960671	0.404821796922373	1.87862247049636	2.36318462336769	2.84897138543585	no	0.873787899825306	no
WBGene00224482	Bm4221	Bm4221	0	0	824.425995494445	0	12.1036148503631	0.407460698699351	3.7817372001218	5.29511735016164	274.944485397715	no	0.0228129847968825	no
WBGene00269241	Bm18101	Bm18101	0	34.7887627668776	45.8307687629087	0	30.4414869008029	2.03025187869609	14.3567530125517	26.5290008934107	15.9536735472016	no	1.62377792734807	no
WBGene00226791	Bm6530	Bm6530	0	19.4580877824007	0	0	40.4490114535631	3.54607011011579	26.3295189793209	28.7455394050949	1.1820233700386	no	13.6320902028509	no
WBGene00223250	Bm2989	Bma-smu-1	0	7.03083833889302	0	0	7.87909929113833	0.56838213954719	5.27528639663095	6.72840800888743	0.189460713182397	no	6.49740501996919	no
WBGene00233047	Bm12786	Bm12786	0	0	173.688179344241	0	5.81219271494595	0.0652212895041601	0.605333907159937	2.13917554070196	57.9178002112483	no	0.0532805965166134	no
WBGene00222104	Bm1843a	Bma-mppe-1.1	2	0	0	0	8.81901384989231	1.11332490010471	6.88868432217309	5.23589939068847	0.371108300034903	no	4.54807208922134	no
WBGene00222492	Bm2231	Bma-rpoa-12	0	0	46.0672015045148	0	3.40774394298914	181.830549475236	5.32369552279051	2.91047982192655	75.9659169932504	no	0.0508079416798151	no
WBGene00224334	Bm4073	Bm4073	3	0	0	0	9.62186525079287	0.32391413526856	3.00632217757582	4.20939580945623	0.107971378422853	no	4.701742220879	no
WBGene00225485	Bm5224	Bma-edc-3	0	13.0128001864441	0	0	17.8043200967754	3.92691613856415	23.0189172631543	17.9453458487913	1.30897204618805	no	8.2050997022977	no
WBGene00223853	Bm3592a	Bma-mrpl-54	0	0	0	0	0	0	0	0	0	no	1	no
WBGene00233048	Bm12787	Bma-bro-1	0	27.0688511917166	1.07685535563668	0	34.5509364830225	2.84021552293379	31.3817841343441	31.0005239363611	1.30569029285683	no	13.8789342330584	no
WBGene00221872	Bm1611a	Bm1611a	0	45.295072123196	1.70596874016929	0	20.3669054335849	1.71409814772467	19.8861778283225	28.5160517950345	1.14002229596465	no	13.7924038691988	no
WBGene00233049	Bm12788	Bm12788	2	0	0	0	41.7053695804234	9.57262800421158	29.615259861881	23.7735431474348	3.19087600140386	no	5.9113042569468	no
WBGene00233050	Bm12789	Bm12789	3	0	0	0	0	0	0	0	0	no	1	no
WBGene00233052	Bm12791	Bm12791	6	3.87805566438451	111.76388259333	0	2.1955934129326	0.184783231529044	3.43003201468382	3.16789369733365	37.3162219416195	no	0.108776217647033	no
WBGene00233053	Bm12792	Bm12792	0	0	0	0	18.3936058609534	2.32203506608184	14.3675638205431	10.9203898938322	0.774011688693948	no	6.71945397530505	no
WBGene00224390	Bm4129	Bma-mgl-2	7	17.2081089930561	1.40057533847354	0	33.4030648390683	3.47781492604138	27.9746189997581	26.1952642772942	1.62613008817164	no	10.3556424717056	no
WBGene00236617	NA	NA	NA	0	0	0	39.4828263739432	0	0	13.1609421246477	0	no	14.1609421246477	no
WBGene00233867	Bm13606	Bm13606	0	0	0	0	1.73880328753888	0.585357359103396	0	0.579601095846293	0.195119119701132	no	1.32171017081654	no
WBGene00225067	Bm4806a	Bma-bli-4	1	11.6999943699094	0.30458890071105	0	38.5227933785466	3.74899428890626	27.5166795183535	25.9131557556032	1.3511943965391	no	11.446588931659	no
WBGene00236717	NA	NA	NA	0	0	0	0	0	0	0	0	no	1	no
WBGene00226127	Bm5866	Bma-mrrf-1	0	0	0	0	13.5236452540671	0.56908142859683	7.04236888054178	6.85533804486964	0.189693809532277	no	6.60282333313808	no
WBGene00228930	Bm8669	Bm8669	0	0	0	0	26.9888500847225	0.22714073127259	12.648874689388	13.2125749247035	0.0757135770908635	no	13.2122297490561	no
WBGene00228931	Bm8670	Bm8670	0	128.334847050704	0	0	131.843954827862	8.45418113161532	51.4927972704727	103.89053304968	2.81806037720511	no	27.4722038645344	no
WBGene00233931	Bm13670a	Bma-pbs-4	0	30.0825249221406	280.833288328774	0	4.81599143993418	0.810636847464955	5.64278137431423	13.5137659121297	93.8813083920797	no	0.152967598761962	no
WBGene00222969	Bm2708	Bma-rpl-34	0	117.024181184198	1854.16422125995	0	46.9088328241634	2.51229492252058	26.6482189297223	63.527077646028	618.892172060824	no	0.104094035308606	no
WBGene00227464	Bm7203a	Bm7203a	1	59.4399864962409	4.3622062482269	582.031201774829	127.560404849836	13.663497389508	94.7393293898022	93.9132402452929	200.018968470855	no	0.472160617315346	no
WBGene00228932	Bm8671	Bm8671	0	9.84538431956117	0	0	13.47061135111	0.860047876402728	7.98230371287373	10.4327664611816	0.286682625467576	no	8.8854595802341	no
WBGene00233846	Bm13585	Bm13585	0	0	0	0	0	0	0	0	0	no	1	no
WBGene00226982	Bm6721	Bma-hex-4	0	0	0	0	0.520573750781701	0.175247929515611	0	0.1735245835939	0.0584159765052036	no	1.10875554568703	no
WBGene00227310	Bm7049a	Bma-trpp-10	0	4.95988683506932	0	0	4.08123765726342	0.578494056421853	3.69128199085147	4.24413549439474	0.192831352140618	no	4.39637630666211	no
WBGene00227466	Bm7205	Bma-prhg-1	0	14.1911937912974	0	0	3.19053142415702	0.402777242392462	1.24608965214741	6.20927162253395	0.134259080797487	no	6.35593026724121	no
WBGene00236674	NA	NA	NA	0	0	0	0	0	0	0	0	no	1	no
WBGene00225404	Bm5143	Bm5143	12	16.1129803374818	0	0	8.00446241708794	0.918631603836001	7.38922848539846	10.5022237466561	0.306210534612	no	8.80579618818701	no
WBGene00229847	Bm9586	Bm9586	0	52.0494388830319	0	0	38.6545153311332	2.78845783194781	43.1338725743336	44.6126089294995	0.929485943982605	no	23.6397725890408	no
WBGene00227125	Bm6864	Bm6864	0	1955.50742506321	7.37710746400971	1312.39606094428	1178.59811964605	53.1945862716697	838.75671255039	1324.28741908655	457.655918226654	no	2.88950249287229	no
WBGene00225937	Bm5676	Bma-mekk-3	0	0	0	0	15.279979803551	0.894593144112761	10.3786579382513	8.55287924726743	0.298197714704254	no	7.35857037727392	no
WBGene00226246	Bm5985a	Bma-sqv-5	1	15.474788864113	0	0	30.8282647836349	3.94820712143269	35.5972476747784	27.3001004408421	1.31606904047756	no	12.2190228124662	no
WBGene00226247	Bm5986	Bma-algn-10	10	56.6933283959087	3.90737115855331	0	150.734435878244	12.360672739953	81.5131911945241	96.3136518228922	5.42268129950209	no	15.1515616741619	no
WBGene00224501	Bm4240	Bm4240	0	36.1925760086749	0	0	59.5620460836213	3.16597799564342	26.9354943904637	40.8967054942533	1.05532599854781	no	20.3844575137255	no
WBGene00229848	Bm9587	Bma-ceh-8	0	0	0	0	3.59404226474816	0.100826006008262	0.9357895347411	1.50994393316309	0.0336086686694207	no	2.42833096242718	no
WBGene00224760	Bm4499	Bma-ccpp-1	6	3.93719538412042	0	0	17.461094207555	0.562803437496151	9.28623852385522	10.2281760385102	0.18760114583205	no	9.45450084644672	no
WBGene00227027	Bm6766	Bma-nduf-9	0	1911.68694674359	24.8443690150235	3415.49036978667	675.203935425204	140.973064958186	1475.71206021004	1354.20098079294	1193.76926791996	no	1.13427840603256	no
WBGene00229849	Bm9588	Bma-oxy-5	0	0	51.1753780680295	0	1.60589335882798	0.675767568319751	2.50878218184798	1.37155851355866	17.2837152121164	no	0.12970878653738	no
WBGene00229850	Bm9589	Bm9589	4	0	0	0	6.20837626174319	0.746432650986805	5.54225157446201	3.91687594540173	0.248810883662268	no	3.93724623137691	no
WBGene00227702	Bm7441	Bma-fitm-2	6	0	0	0	1.12365256608867	0.189135339042976	0	0.374550855362889	0.0630451130143255	no	1.29303153604203	no
WBGene00225356	Bm5095a	Bm5095a	0	0	1.26193986988674	0	2.82484037379363	0.158494169806573	1.47102113129738	1.43195383503034	0.473478013231103	no	1.65048532329128	no
WBGene00226272	Bm6011	Bm6011	0	0	0	0	3.40015431282658	0.572320446873921	7.96775810983346	3.78930414088668	0.190773482291307	no	4.02201108112604	no
WBGene00224122	Bm3861	Bm3861	1	10.6279274568506	0	0	5.01424114230064	0.337602645911615	1.56668420902791	5.73628426939304	0.112534215303872	no	6.05490076325709	no
WBGene00227613	Bm7352	Bm7352	0	4.0333400819055	0	0	11.6227465767367	0.760807767316256	5.04373803935602	6.8999415659994	0.253602589105419	no	6.30179104179808	no
WBGene00230461	Bm10200	Bm10200	1	0	0	0	1.76018749399593	0.0592556219784145	2.19986065568961	1.32001604989518	0.0197518739928048	no	2.2750789766252	no
WBGene00225070	Bm4809	Bma-aho-3	0	0	0	0	1.61894940239569	0.136252322718129	0	0.539649800798563	0.0454174409060429	no	1.47276077531687	no
WBGene00230460	Bm10199	Bm10199	1	0	0	0	0.475597908554248	0.0800535453727074	0	0.158532636184749	0.0266845151242358	no	1.12842126195364	no
WBGene00221644	Bm1383	Bm1383	0	0	0	0	0	0.463290650203829	0	0	0.15443021673461	no	0.866228192491854	no
WBGene00234006	Bm13745	Bma-tre-1	0	0	849.061985972861	0	5.15766650830789	23.0453897876984	4.39499188122264	3.18421946317684	290.702458586853	no	0.0143441350595645	no
WBGene00230459	Bm10198	Bm10198	0	0	0	0	18.7705240138418	0	0	6.25684133794728	0	no	7.25684133794728	no
WBGene00226161	Bm5900	Bma-asd-2	0	0	1.30298822589049	0	0.955628291704842	121.390528122846	1.4929155896433	0.816181293782714	40.8978387829123	no	0.0433478515011955	no
WBGene00268737	Bm17594a	Bm17594a	0	0	0	0	0	0	0	0	0	no	1	no
WBGene00222353	Bm2092a	Bma-unc-89	0	63.9114904348625	171.827539042982	0	2.06372835772096	278.079065545747	1.58469166091038	22.5199701511646	149.968868196243	no	0.155793511815901	no
WBGene00222658	Bm2397a	Bma-glb-8	0	0	83.073450998293	0	0.726985374504351	123.285318929161	0	0.242328458168117	68.7862566424848	no	0.0178019071080509	no
WBGene00234866	NA	NA	NA	0	0	0	129.014305897955	5.42898339393783	50.387653398806	59.8006530989204	1.80966113131261	no	21.6398527286156	no
WBGene00230452	Bm10191	Bma-cutl-7	1	0	3.03479408216406	0	1.35396369512537	0.0759672489100485	1.41013929496067	0.921367663362013	1.03692044369137	no	0.943270842664848	no
WBGene00230451	Bm10190	Bm10190	2	0	0	0	0	73.3429257658832	0	0	24.4476419219611	no	0.0392963718629273	no
WBGene00227506	Bm7245	Bma-zoo-1	0	0	0	0	0.216559074158467	0.109354906890043	0.169158040158647	0.128572371439038	0.0364516356300143	no	1.0888808822739	no
WBGene00235441	NA	NA	NA	290.645177816985	18.6969707703129	0	54.8503935254779	9.23252265795416	171.378366051029	172.291312464497	9.30983114275567	no	16.8083560307642	no
WBGene00227407	Bm7146	Bma-pod-1	0	0	4.37474213285535	0	0.358541401235119	0.181051113654103	0	0.119513800411706	1.51859774883648	no	0.444498848984078	no
WBGene00226354	Bm6093	Bma-nuo-6	2	0	932.317590065897	0	0	1.07971378422853	2.00421478505055	0.668071595016849	311.132434616709	no	0.00534411490130848	no
WBGene00226854	Bm6593	Bma-ttc-37	0	8.80583176622579	0.377648054988177	0	9.97098953420335	0.745927084604908	3238.72309917688	1085.83330682577	0.374525046531028	no	790.697346380612	no
WBGene00230450	Bm10189	Bma-dpy-3	1	0	77.2051267041089	0	0	0	2.08116543997395	0.693721813324651	25.735042234703	no	0.0633521278349111	no
WBGene00223437	Bm3176	Bma-kcnl-2	7	0	0	0	0.319475994655232	0.0268874038064722	0.748644682892416	0.356040225849216	0.00896246793549075	no	1.34399471629892	no
WBGene00234028	Bm13767	Bm13767	0	0	0	0	1.56120503418505	0.167226820377261	0.443448824458038	0.668217952881029	0.0557422734590869	no	1.58013749645091	no
WBGene00232384	Bm12123	Bma-smd-1	0	0	22.4564463835351	0	0.923761165667085	0.155489237986925	1.44313166249101	0.7889642760527	7.53731187384066	no	0.209546553117533	no
WBGene00231666	Bm11405	Bm11405	31	2.45376800762979	5.84605086708572	0	2.16056636303077	0.132243870304344	0.613693008202286	1.74267579295428	1.99276491246335	no	0.91643542783211	no
WBGene00236664	NA	NA	NA	0	0	0	26.6279526707989	0	41.5991092013398	22.7423539573796	0	no	23.7423539573796	no
WBGene00223197	Bm2936	Bma-rskn-2	0	0	0	0	0	0.0466542993185168	0.43300936714055	0.144336455713517	0.0155514331061723	no	1.12681290027177	no
WBGene00223198	Bm2937a	Bma-dod-18	0	0	0	0	0	0	0	0	0	no	1	no
WBGene00223199	Bm2938	Bm2938	2	0	0	0	0	0.159609863755522	1.48137614547214	0.493792048490714	0.0532032879185074	no	1.41833211653086	no
WBGene00234273	Bm14012	Bma-cyc-1	2	0	0	0	0	0	0	0	0	no	1	no
WBGene00224392	Bm4131a	Bma-mec-8	3	0	10.7796066505375	0	230.785131317727	0.103589847075944	0.961441384390009	77.2488575673725	3.62773216587113	no	16.9086832951238	no
WBGene00228342	Bm8081	Bm8081	0	0	0	0	0	0	0	0	0	no	1	no
WBGene00225710	Bm5449a	Bma-gcy-28	4	0	15.4635211155911	0	0.226184397223439	0	0	0.0753947990744795	5.15450703853035	no	0.174732889627384	no
WBGene00229846	Bm9585a	Bma-inx-14	5	0	0	0	0	0.480470951660438	0	0	0.160156983886813	no	0.861952316702653	no
WBGene00229845	Bm9584a	Bm9584a	0	0	0	0	0	0	0	0	0	no	1	no
WBGene00233688	Bm13427	Bm13427	1	0	0	0	0	0	0	0	0	no	1	no
WBGene00221971	Bm1710a	Bma-avr-14	4	0	26.4856766632599	0	0.254303601298024	0.0428048662931245	0.39728188687565	0.217195162724558	8.84282717651769	no	0.123663165155277	no
WBGene00228559	Bm8298	Bm8298	8	0	299.436759952272	0	0	0.0412298450069083	0	0	99.825996599093	no	0.00991807702111021	no
WBGene00224191	Bm3930	Bma-rps-26	0	807.857278991003	1784.95085783312	0	0	0	4.50569696639197	270.787658652465	594.983619277708	no	0.456032095281165	no
WBGene00224194	Bm3933	Bm3933	3	0	0	0	0	0	0	0	0	no	1	no
WBGene00224195	Bm3934	Bma-dnj-12	0	0	1.13459088613454	0	0	199.732141243688	0	0	66.9555773766075	no	0.0147154956017522	no
WBGene00227440	Bm7179	Bm7179	1	0	20.4924664485127	0	0	0	0	0	6.83082214950425	no	0.127700512271666	no
WBGene00227439	Bm7178	Bm7178	1	0	0	0	5.71786249610163	0	0	1.90595416536721	0	no	2.90595416536721	no
WBGene00226655	Bm6394	Bma-rpb-10	0	0	1688.41668537733	0	0	0	0	0	562.805561792445	no	0.00177366111256656	no
WBGene00235013	Bm14678	Bma-pfd-1	0	0	22.0741450399688	0	0	0.550654029956552	0	0	7.5415996899751	no	0.117074088729967	no
WBGene00222336	Bm2075a	Bm2075a	3	0	133.329567525481	0	0	0.153813974848199	0	0	44.4944605001098	no	0.0219806980675721	no
WBGene00235014	Bm14679	Bm14679	0	0	444.205407313845	0	0	2.03086312418117	0	0	148.745423479342	no	0.00667800041406911	no
WBGene00228779	Bm8518	Bm8518	0	0	0	0	0	0	0	0	0	no	1	no
WBGene00223624	Bm3363b	Bma-hxk-1.2	0	0	0	0	2.79780565630874	0.235465987153076	0	0.932601885436247	0.0784886623843588	no	1.79195382653684	no
WBGene00227372	Bm7111	Bm7111	8	0	0.299769020606975	0	1.09927223967392	0	0.343464227276807	0.480912155650241	0.0999230068689915	no	1.34637801591746	no
WBGene00221967	Bm1706a	Bma-mrpl-9	0	0	901.427575495008	0	0	1099.65308878482	1.39637915351882	0.465459717839608	667.026888093275	no	0.00219371367224816	no
WBGene00227581	Bm7320a	Bma-uaf-2	0	0	0	0	0	0	0	0	0	no	1	no
WBGene00268739	Bm17596	Bm17596	1	0	0	0	0	0	0	0	0	no	1	no
WBGene00232400	Bm12139a	Bm12139a	0	0	0	0	0.484554365147843	0.163122226394239	0.75698759867017	0.413847321272671	0.0543740754647462	no	1.34093520902387	no
WBGene00233654	Bm13393	Bm13393	0	0	0	0	0	0	0	0	0	no	1	no
WBGene00232401	Bm12140	Bma-mxt-1	0	2.89087222724458	24.7226157166911	0	1.09112754243655	24.6105291292076	0	1.32733325656038	16.4443816152996	no	0.133414488852915	no
WBGene00227861	Bm7600a	Bma-anc-1.1	1	13.510498796201	625.722041460332	0	0.540732923185054	74.0879967577906	0	4.68374390646203	233.270012739374	no	0.0242615085046553	no
WBGene00268740	Bm17597	Bma-anc-1.3	0	0	0	0	0	0.103934339646662	0	0	0.0346447798822206	no	0.966515290507565	no
WBGene00231627	Bm11366a	Bma-anc-1.2	0	0	89.132173894923	0	0	127.735581035691	0.0694112142045212	0.0231370714015071	72.2892516435379	no	0.01396026086305	no
WBGene00226875	Bm6614	Bm6614	0	0	0	0	0.725373433540926	0	0	0.241791144513642	0	no	1.24179114451364	no
WBGene00227221	Bm6960	Bm6960	0	0	336.660112780409	0	1.38830186704377	369.684312078742	0	0.462767289014591	235.448141619717	no	0.00618641905575718	no
WBGene00224134	Bm3873	Bma-tax-2	4	12.2149355043666	0	0	3.77605205015376	0.75115450046539	3.7539594872143	6.58164901391156	0.250384833488463	no	6.06345247547463	no
WBGene00227284	Bm7023a	Bm7023a	1	0	0	0	0.393674390525821	0	0.615011757145475	0.336228715890432	0	no	1.33622871589043	no
WBGene00223838	Bm3577	Bm3577	0	0	0	0	0.501753709397174	0.0422280697819441	0.391928504745314	0.297894071380829	0.014076023260648	no	1.27987847223485	no
WBGene00223839	Bm3578	Bma-glc-2	4	0	0	0	0	0	0	0	0	no	1	no
WBGene00229937	Bm9676	Bma-cdt-1	1	0	0	0	0	0.186166539951503	0.86392740674118	0.28797580224706	0.0620555133171675	no	1.2127198494778	no
WBGene00229938	Bm9677	Bm9677	0	0	0	0	0	0	0	0	0	no	1	no
WBGene00229940	Bm9679	Bm9679	0	0	0	0	0	0	1.23554598214997	0.411848660716655	0	no	1.41184866071666	no
WBGene00234123	Bm13862	Bm13862	0	0	0	0	0	0	4.42488978517653	1.47496326172551	0	no	2.47496326172551	no
WBGene00222684	Bm2423	Bm2423	0	0	1.75887362692713	0	0.869897029321445	0.0732113620075187	2.71796648912838	1.19595450614994	0.610694996311549	no	1.36335837087631	no
WBGene00223131	Bm2870	Bm2870	2	0	0	0	0	0.434563496019827	0	0	0.144854498673276	no	0.873473442397142	no
WBGene00229941	Bm9680a	Bma-erp-44.1	0	0	0	0	1.95059959939413	0	0.761823550109716	0.904141049834614	0	no	1.90414104983461	no
WBGene00224786	Bm4525	Bma-pdxk-1	0	0	136.787576072553	0	0	0	0	0	45.595858690851	no	0.0214611347037231	no
WBGene00268741	Bm17598	Bma-mtd-1	1	0	0	0	0	0	0	0	0	no	1	no
WBGene00229134	Bm8873	Bm8873	1	5812.31012617727	138.515828148066	542.490549100866	10.0998316304748	27.5135283073695	7.88915325382884	1943.43303702053	236.1733018521	no	8.19836390452185	no
WBGene00222655	Bm2394	Bma-nas-36	0	0	0	0	0	0.081200299340549	0.753638801625284	0.251212933875095	0.0270667664468497	no	1.21823913960694	no
WBGene00223880	Bm3619	Bm3619	3	5.45755078232653	0	0	7.42656749422128	0.22059776095169	4.09483791451571	5.65965206368784	0.0735325869838966	no	6.20349316307036	no
WBGene00229133	Bm8872	Bm8872	1	0	213.592916604947	0	1.36228669225979	1427.86784722047	0	0.454095564086596	547.153587941806	no	0.00265271558204407	no
WBGene00269357	Bm18208a	Bma-rig-5	0	0	0	0	0	0	0	0	0	no	1	no
WBGene00224649	Bm4388	Bm4388	0	4.57816871301986	4.68196262665627	0	0.863989409427921	89.3657162745937	0.674877078157937	2.03901173353524	31.3492263004167	no	0.0939438769049045	no
WBGene00235452	NA	NA	NA	0	0	0	0	0	0	0	0	no	1	no
WBGene00229132	Bm8871	Bm8871	1	0	1669.18208494994	0	0	176.016753211986	0	0	615.066279387308	no	0.00162320197267496	no
WBGene00268742	Bm17599	Bm17599	0	24.4645890601999	3819.01479767595	0	9.2338868132609	11916.1643101555	0	11.2328252911536	5245.0597026105	no	0.00233181206173967	no
WBGene00222756	Bm2495	Bm2495	1	0	0.548076903395164	0	1.20589991031527	0.202979368599045	2.51186476483428	1.23925489171652	0.250352090664736	no	1.79089946618639	no
WBGene00226938	Bm6677a	Bma-aps-3	0	0	0	0	1.26519554126448	0	0	0.421731847088159	0	no	1.42173184708816	no
WBGene00233911	Bm13650	Bma-rpl-39	0	51567.9429296696	92380.7726320925	0	59298.4235564893	487.490773579182	25315.0011599987	45393.7892153859	30956.0878018906	no	1.46637789400247	no
WBGene00224540	Bm4279c	Bma-nud-1	0	0	2.3568450255831	0	0	17.3140551482342	0	0	6.55696672460575	no	0.13232822591953	no
WBGene00268743	Bm17600	Bma-tnsl-1	0	0	0.278775344133395	0	1.2480719028188	0.21007783866087	1.62481759983433	0.957629834217711	0.162951060931422	no	1.68332950541343	no
WBGene00224847	Bm4586	Bma-exos-3	2	0	0	1386.97286974868	0	0	0	0	462.324289916228	no	0.00215831550765622	no
WBGene00225183	Bm4922	Bma-hsb-1	0	0	168.803337842935	0	2.31313528251384	0	0	0.771045094171281	56.2677792809783	no	0.0309256813588289	no
WBGene00225182	Bm4921a	Bma-eak-7	0	0	873.182603090814	0	0.838522127311865	3.246257737935	0	0.279507375770622	292.142953609583	no	0.00436478980652801	no
WBGene00225972	Bm5711	Bma-nuo-2	0	0	158.051803857566	0	0	0	0	0	52.6839346191886	no	0.0186275467156717	no
WBGene00227780	Bm7519	Bm7519	1	0	0	0	0	0	0	0	0	no	1	no
WBGene00232628	Bm12367	Bma-ttr-38	1	0	0	0	0	0	0	0	0	no	1	no
WBGene00229131	Bm8870	Bma-catp-1	10	0	0	0	0.536593906823878	0.0602136719471352	0.558857047772432	0.36515031819877	0.0200712239823784	no	1.33828921559928	no
WBGene00225921	Bm5660	Bm5660	0	0	0	0	1.01981916263135	0	0.79659839485977	0.605472519163708	0	no	1.60547251916371	no
WBGene00229130	Bm8869	Bm8869	2	0	0	0	2.14019058849412	0	0	0.713396862831372	0	no	1.71339686283137	no
WBGene00227601	Bm7340	Bma-mlt-4	0	0	0	0	1.20568827466938	0	0	0.401896091556459	0	no	1.40189609155646	no
WBGene00226578	Bm6317a	Bma-pad-1	0	0	0	0	0.689379538313794	0.0966980635616843	0.538486286385313	0.409288608233036	0.0322326878538948	no	1.36528190282665	no
WBGene00224688	Bm4427	Bm4427	1	0	0	0	0	0	0	0	0	no	1	no
WBGene00221824	Bm1563a	Bma-pfkb-1.1	0	0	7.31329067116323	0	0	0	0	0	2.43776355705441	no	0.29088678828652	no
WBGene00229007	Bm8746	Bm8746	0	0	0	0	0.573935821977119	0.0966059701678161	1.7932448076768	0.789060209884641	0.0322019900559387	no	1.73324623195862	no
WBGene00221959	Bm1698	Bm1698	1	0	2806.11078008601	0	2.42328458168117	422.98387338144	60.571824614861	20.9983697321807	1076.36488448915	no	0.0204186808470294	no
WBGene00224893	Bm4632a	Bma-ctg-1	0	0	134.624278958351	0	0	85.6528691018161	0.369578862739176	0.123192954246392	73.4257160200556	no	0.01509146319726	no
WBGene00234310	Bm14049	Bma-rps-7	0	17707.0769329272	2451.94622367066	0	146.476550614012	528.325968205029	0	5951.18449451374	993.424063958563	no	5.98555959197078	no
WBGene00224243	Bm3982a	Bm3982a	11	0	320.043676012764	0	0	0	0	0	106.681225337588	no	0.00928666995444129	no
WBGene00231956	Bm11695	Bma-daf-36	2	0	0	0	0	0.089683066768168	0	0	0.0298943555893893	no	0.970973376611739	no
WBGene00236141	NA	NA	NA	0	0	0	46.2627056502768	0	36.136599912275	27.4664351875173	0	no	28.4664351875173	no
WBGene00226128	Bm5867	Bma-wts-1	0	12.1538823856762	9.59339412374132	0	16.7438187968024	1.81455504663167	13.6163750871373	14.1713587565386	3.80264972345766	no	3.15895591603046	no
WBGene00223943	Bm3682a	Bma-cpn-3	0	0	443.105673560251	0	7.64062321631121	36.0103588703712	6.82082629421397	4.82048317017506	159.705344143541	no	0.0362183547858635	no
WBGene00228078	Bm7817	Bm7817	2	10.2040435254099	0	0	2.65149046278121	0.44630392238856	5.52300021816322	6.12617806878477	0.14876797412952	no	6.20332236732543	no
WBGene00234168	Bm13907	Bma-eif-1	10	6.88478648162221	0	0	7.79575805851474	0.656098418671636	4.05960101142153	6.24671518385283	0.218699472890545	no	5.94626923622512	no
WBGene00225636	Bm5375	Bma-glb-23	0	0	0	0	2.23633196258662	0.188211826645306	3.49367518683127	1.9100023831393	0.0627372755484352	no	2.73821427938299	no
WBGene00268744	Bm17601	Bm17601	0	0	0	0	12.6940350869662	0.427336830343222	3.9662121854936	5.5534157574866	0.142445610114407	no	5.7363043802412	no
WBGene00268745	Bm17602	Bm17602	0	0	0	0	4.67347740752797	3.5399187640064	7.30106814554128	3.99151518435641	1.17997292133547	no	2.28971430585412	no
WBGene00220884	Bm623	Bm623	1	291.254804102078	0	0	484.656916336234	20.3945937020945	265.001732690017	346.971151042776	6.79819790069817	yes	44.6219954243047	yes
WBGene00230979	Bm10718	Bm10718	3	23.722455607301	0	0	20.5473659011997	2.42100022143302	9.62994183395754	17.9665877808194	0.807000073811007	no	10.4961743254489	no
WBGene00235436	NA	NA	NA	0	0	0	0	0	0	0	0	no	1	no
WBGene00230978	Bm10717	Bm10717	1	0	0	0	22.1668288056241	2.29610019937207	7.99148933279648	10.0527727128069	0.765366733124023	no	6.26089327810527	no
WBGene00230977	Bm10716	Bm10716	1	0	0	0	0	0.246614088912083	3.43332379204916	1.14444126401639	0.0822046963040277	no	1.98154865834545	no
WBGene00228097	Bm7836	Bm7836	0	0	0	0	2.48868385765844	0.20945000233812	2.59193870046385	1.69354085270743	0.0698166674460399	no	2.51775928967127	no
WBGene00268746	Bm17603	Bm17603	0	0	0	0	0	0	0	0	0	no	1	no
WBGene00228921	Bm8660a	Bma-asp-4	1	7.2444875160688	112.858035656808	0	6.95873566884387	36.7009725714268	3.62372589649554	5.94231636046941	49.8530027427448	no	0.136517334002659	no
WBGene00234799	NA	NA	NA	0	0	0	0	0	0	0	0	no	1	no
WBGene00221985	Bm1724	Bm1724	1	4.98405595835465	0	0	14.3623939841103	1.14159981820261	11.218714467539	10.188388136668	0.380533272734202	no	8.10439585748553	no
WBGene00225219	Bm4958a	Bm4958a	12	5.63475095140894	0	0	4.25354804678654	0.268486989298528	4.98377997397059	4.95735965738869	0.0894956630995092	no	5.46799758747142	no
WBGene00230976	Bm10715	Bm10715	1	73.7965981108057	0	0	137.833426550481	6.96011542593406	92.2834924672887	101.304505709525	2.32003847531135	no	30.8142530486581	no
WBGene00225895	Bm5634	Bma-rps-24	1	13.5778268632917	124.721897810054	0	21.7371042210603	2.19529845829854	16.9792282454448	17.4313864432656	42.3057320894508	no	0.425610780697447	no
WBGene00224537	Bm4276a	Bm4276a	0	42.4789691131297	0.692326855574778	518.192746236481	26.9113543843684	0.854673660686444	8.72566680808591	26.0386634351947	173.246582250914	no	0.155174713247799	no
WBGene00230975	Bm10714	Bm10714	0	1387.38252390809	0	0	11.7854517363235	0.305192257299751	9.9139603084745	469.693978650964	0.10173075243325	no	427.231406231879	no
WBGene00230974	Bm10713	Bm10713	1	57.8434323193359	0	0	86.1829435904351	2.68186972211603	49.7821091770619	64.6028283622777	0.893956574038677	no	34.6379791709723	no
WBGene00229124	Bm8863	Bma-cutl-6	1	4.17349481474089	0	0	5.90714685216347	0.397720881481946	6.15223283115258	5.41095816601898	0.132573627160649	no	5.66052220559929	no
WBGene00224327	Bm4066a	Bma-slc-25A42.1	6	9.3126566409361	0	0	5.963551900231	0.12547455109687	4.6582335824417	6.64481404120293	0.0418248503656235	no	7.33790717174775	no
WBGene00227515	Bm7254	Bma-dsbn-1	0	0	0	0	3.18646186876907	0.715135103839677	1.6593336694412	1.61526517940342	0.238378367946559	no	2.11184662708537	no
WBGene00235504	NA	NA	NA	0	0	0	19.4068129634636	0	0	6.46893765448786	0	no	7.46893765448786	no
WBGene00235505	NA	NA	NA	0	0	0	0	0	0	0	0	no	1	no
WBGene00229123	Bm8862	Bm8862	0	19.800548556746	0.834658080925903	0	13.0786191252278	0.83863545492431	2.91883877452969	11.9326688188345	0.557764511950071	no	8.30206922780958	no
WBGene00255391	NA	NA	NA	0	0	0	0	0	0	0	0	no	1	no
WBGene00229122	Bm8861	Bm8861	0	0	0	0	0.679123348069011	0	0	0.226374449356337	0	no	1.22637444935634	no
WBGene00235506	NA	NA	NA	0	0	0	22.0192685546991	0	0	7.33975618489969	0	no	8.33975618489969	no
WBGene00235508	NA	NA	NA	0	0	0	0	0	0	0	0	no	1	no
WBGene00235507	NA	NA	NA	0	177.059870974878	0	0	0	0	0	59.0199569916259	no	0.0166611249011645	no
WBGene00224138	Bm3877	Bma-ent-6	10	5.17901671953015	0	0	5.86428663172523	0.575801269054013	3.81724646960651	4.95351660695397	0.191933756351337	no	4.99483849268473	no
WBGene00229121	Bm8860	Bm8860	0	0	0	0	1.50361387372863	0.253091149684561	0	0.50120462457621	0.0843637165615203	no	1.38441060102645	no
WBGene00220320	Bm59	Bm59	12	0	0	0	1.2108414697627	0.0509527853231442	0.472904612202938	0.561248693988545	0.0169842617743814	no	1.53517488192449	no
WBGene00268747	Bm17604	Bm17604	0	133.69471472468	0	0	70.6369371346764	5.36956168514846	39.1569724422562	81.1628747672043	1.78985389504949	no	29.4506013067565	no
WBGene00221857	Bm1596	Bma-zipt-17.1	6	16.0271603366699	0	0	16.677899768041	1.94348481161136	12.0252887103033	14.9101162716714	0.647828270537119	no	9.65520288499807	no
WBGene00231937	Bm11676	Bm11676	0	28.9559526325462	0	0	9.27127097039961	1.17041848472546	7.24195018484863	15.1563912625982	0.390139494908488	no	11.6221367148926	no
WBGene00222751	Bm2490	Bma-zipt-17.2	8	0	0	0	3.42943306580113	0.43293652673484	0	1.14314435526704	0.14431217557828	no	1.87286686361089	no
WBGene00228329	Bm8068	Bma-pgal-1	0	4.60422545014576	0.582249623138787	0	1.73781364423351	0.438768151359802	0	2.11401303145975	0.340339258166196	no	2.3233021136158	no
WBGene00227297	Bm7036	Bma-arx-1	0	14.5516181083193	0	0	26.2080815961322	1.47046472902945	14.5575722942634	18.4390906662383	0.490154909676483	no	13.0450133338544	no
WBGene00227296	Bm7035	Bma-dnc-5	2	0	0	0	5.68239188508363	3445.52743690514	0	1.89413062836121	1148.50914563505	no	0.00251770996285753	no
WBGene00228328	Bm8067	Bm8067	1	10.200179779576	0	0	20.4061298407741	0.996353798846628	8.51733342602768	13.0412143487926	0.332117932948876	no	10.5405189747051	no
WBGene00229170	Bm8909a	Bm8909a	0	0	0.515112078476762	0	12.2994504447866	0.388175046293642	1.80137129472066	4.70027391316908	0.301095708256801	no	4.38113343775937	no
WBGene00224306	Bm4045	Bm4045	1	5.46227151647947	0	0	1.03083679031677	0.260268616454818	2.41561336348091	2.96957389009238	0.0867562054849395	no	3.65268113497549	no
WBGene00222956	Bm2695	Bma-cmt-1.1	1	0	84.1097722696765	0	1.29855624025444	0.218575458446037	0	0.432852080084813	28.1094492427075	no	0.0492229196141102	no
WBGene00304764	Bm18590	Bma-cmt-1.2	0	0	0	0	0	1.51829766999345	1.76145907991887	0.587153026639623	0.506099223331149	no	1.05381704077186	no
WBGene00223285	Bm3024	Bma-cdc-5L	0	13.0858896337931	64.5430397932655	0	10.6648649367227	0.433307330462037	3.44710781241229	9.06595412764271	21.6587823745759	no	0.444240734618518	no
WBGene00236715	NA	NA	NA	0	0	0	74.6740411855012	0	0	24.8913470618337	0	no	25.8913470618337	no
WBGene00225010	Bm4749	Bma-ceh-6	0	59.3889344852904	0	0	104.010956005876	2.96734273263731	35.8027745089283	66.4008883333651	0.989114244212435	no	33.8848754059632	no
WBGene00229168	Bm8907	Bm8907	1	0	0	0	0	0	0	0	0	no	1	no
WBGene00227494	Bm7233	Bma-unc-95	0	10.1233125268775	15.2984113465294	0	0.810334016167269	0	0	3.64454884768158	5.09947044884314	no	0.761467554705915	no
WBGene00220308	Bm47	Bm47	0	0	0	0	0	0.55223183519998	0	0	0.184077278399993	no	0.84453947241625	no
WBGene00268748	Bm17605	Bma-cof-2.2	0	0	0	0	5.81514456497893	0.391526481431779	5.45077205380684	3.75530553959526	0.130508827143926	no	4.20634091960952	no
WBGene00268749	Bm17606	Bm17606	0	0	0	0	2.56152564842137	0	0	0.853841882807123	0	no	1.85384188280712	no
WBGene00233012	Bm12751	Bm12751	0	0	0	0	2.79780565630874	0.470931974306153	0	0.932601885436247	0.156977324768718	no	1.67038873110376	no
WBGene00234573	Bm14312	Bm14312	4	0	0	0	5.20061452616662	0.583584891702628	8.12457999541686	4.44173150719449	0.194528297234209	no	4.55554842844174	no
WBGene00221793	Bm1532	Bm1532	1	0	0	0	1.80884986547291	0.304469052898567	0	0.602949955157637	0.101489684299522	no	1.45525643862658	no
WBGene00234574	Bm14313	Bm14313	0	0	0	0	4.20184207282331	0	0	1.40061402427444	0	no	2.40061402427444	no
WBGene00268750	Bm17608	Bm17608	0	0	0	0	1.26379907819465	0.638175200280772	5.9230519723762	2.39561701685695	0.212725066760257	no	2.79998914010097	no
WBGene00221385	Bm1124	Bm1124	1	0	0	0	3.06099105054463	0.128807960223755	0.597748269225601	1.21957977325674	0.0429359867412516	no	2.12820326604322	no
WBGene00223883	Bm3622a	Bma-hrdl-1	8	21.8788386229303	0	0	4.55088221321285	0.612810526183762	7.10954569021309	11.1797555087854	0.204270175394587	no	10.1138064843254	no
WBGene00222119	Bm1858a	Bm1858a	4	757.342384047083	1269.20278574641	0	0	2.31159113025239	0	252.447461349028	423.838125625553	no	0.596574191583768	no
WBGene00225045	Bm4784	Bma-kal-1	0	1.40630591362905	0	0	0.787987391624683	0.0947396699035506	0.703440670759519	0.965911325337749	0.0315798899678502	no	1.90572862505009	no
WBGene00223877	Bm3616a	Bma-sur-6	0	0	0	0	8.07558060847402	0.776741200946269	8.41063433726501	5.49540498191301	0.258913733648756	no	5.15953143436376	no
WBGene00221860	Bm1599	Bm1599	0	0	0	0	0.437942996689368	0.0737153989232331	0	0.145980998896456	0.0245717996410777	no	1.11849750236919	no
WBGene00223420	Bm3159	Bm3159	0	0	0	0	0	0	0	0	0	no	1	no
WBGene00229312	Bm9051	Bm9051	1	0	0	0	0	0	0	0	0	no	1	no
WBGene00223516	Bm3255a	Bma-ints-11	0	128.070504255175	101.327288000222	0	82.3296167777766	2.94242611427165	54.6186777300034	88.3395995876516	34.7565713714979	no	2.49855050864484	no
WBGene00224204	Bm3943	Bma-sig-7	0	0	0	0	8.31091702896248	0.466303125322348	7.03278452851927	5.11456718582725	0.155434375107449	no	5.29200733296396	no
WBGene00229311	Bm9050	Bm9050	0	0	0	0	0	0	0	0	0	no	1	no
WBGene00227041	Bm6780	Bma-epg-8	0	41.2795515448985	0	0	8.12058131095285	2.14794125160357	8.15544846044504	19.1851937720988	0.71598041720119	no	11.763067672428	no
WBGene00228686	Bm8425	Bm8425	0	221.322538099692	11.6977120581505	630.782533205541	178.626487363033	813.5708933825	109.112049451719	169.687024971481	485.350379548731	no	0.350954850965381	no
WBGene00228685	Bm8424a	Bm8424a	0	0.811830880702425	4.14225723035177	0	0.536228925798519	0.0257883067484837	0.359020879572679	0.569026895357874	1.38934851236675	no	0.656675611463514	no
WBGene00235537	NA	NA	NA	0	0	0	0	0	0	0	0	no	1	no
WBGene00233634	Bm13373a	Bma-lact-3	1	0	0	0	0	0.125679106934981	0	0	0.0418930356449936	no	0.959791423676175	no
WBGene00223879	Bm3618	Bm3618	1	18.747459967705	0	0	12.1178167221535	0.620776428571748	8.23081419835552	13.0320302960713	0.206925476190583	no	11.6262607533653	no
WBGene00236235	NA	NA	NA	0	0	0	0	0	0	0	0	no	1	no
WBGene00224758	Bm4497	Bma-che-14	9	32.0426850692292	0.969680178061468	0	36.9005372556474	3.65362863478281	22.6067828835085	30.516668402795	1.54110293761476	no	12.402751551804	no
WBGene00224196	Bm3935	Bma-mtx-1	2	0	0	0	1.87859223108179	0.316208220647733	1.46740089881675	1.11533104329951	0.105402740215911	no	1.91362927405657	no
WBGene00224135	Bm3874	Bma-fcp-1	1	0	0	0	1.28459457536763	0.648676213299603	2.67578413710937	1.32012623749233	0.216225404433201	no	1.90764493903462	no
WBGene00224133	Bm3872	Bma-syx-7	1	0	0	0	11.9012763777672	0.667748498864593	9.29629291809933	7.06585643195551	0.222582832954864	no	6.59739055263938	no
WBGene00222256	Bm1995	Bm1995	0	75.7227452922804	0	0	68.9109648727344	3.20277102534801	72.305660278098	72.3131234810376	1.06759034178267	no	35.4582443144067	no
WBGene00224603	Bm4342	Bma-dyf-1	2	0	0	0	0.33377116013536	0.0561809970805402	1.04285771500225	0.458876291712537	0.0187269990268467	no	1.43205814031252	no
WBGene00225068	Bm4807	Bm4807	0	0	0	0	1.21808719664293	0.410061511669773	1.90293797410384	1.04034172358226	0.136687170556591	no	1.79498966508365	no
WBGene00225936	Bm5675a	Bma-rps-17	0	9009.03327211349	645.670540225411	0	2.59050218290577	142.14847243901	2.02348608106065	3004.54908679249	262.606337554807	no	11.4016571629944	no
WBGene00227306	Bm7045a	Bm7045a	0	13.9076632365148	0	0	9.18626218213234	1.87758823967993	6.15047001372245	9.74813181078986	0.625862746559977	no	6.61072518792309	no
WBGene00229180	Bm8919	Bm8919	0	96.706551544773	237.040307336807	0	133.378365080435	34.5392312696762	80.141653031255	103.408856552154	90.5265128688277	no	1.1407498579323	no
WBGene00221960	Bm1699a	Bma-lmd-2	0	0	7.18856654305855	0	6713.81498923763	2.89650385699689	0	2237.93832974588	3.36169013335181	no	513.318979866488	no
WBGene00221961	Bm1700a	Bma-rpl-4	2	190.552380069064	492.243532466494	0	33.1593372881646	9.3024046306833	14.1279993513984	79.2799055695425	167.181979032392	no	0.477339522530416	no
WBGene00229181	Bm8920	Bm8920	0	0	0	0	5.43083935894554	0.609419479793812	0	1.81027978631518	0.203139826597937	no	2.33578818038272	no
WBGene00223800	Bm3539a	Bma-ubxn-1	0	21.1340341921159	0	0	42.102390393957	6.7786347412717	80.0724659926669	47.7696301929133	2.25954491375723	no	14.9620979257185	no
WBGene00229182	Bm8921a	Bm8921a	0	19.0026444376989	0	0	22.0558332650191	3.07239711168053	14.2578149105887	18.4387642044356	1.02413237056018	no	9.60350443832679	no
WBGene00227848	Bm7587	Bm7587	0	12.0321627901429	1894.22262512264	0	7.94746034101186	0.573313566142171	5.32105611003752	8.4335597470641	631.598646229594	no	0.0149123931947845	no
WBGene00229183	Bm8922a	Bm8922a	0	0	0	0	4.1389175078288	3.88144978513139	1.84741719148734	1.99544489977204	1.2938165950438	no	1.30587811869713	no
WBGene00221443	Bm1182	Bm1182	2	5.10493738908673	0	0	3.3719031358479	38.1079461202578	8.27782021549589	5.58488691347684	12.7026487067526	no	0.480555770960679	no
WBGene00225362	Bm5101	Bm5101	1	0	0	0	3.76851990623484	0.634324444821041	7.84974962438886	3.8727565102079	0.211441481607014	no	4.02227972559107	no
WBGene00234971	Bm14786	Bma-atp-4	1	0	472.730190135809	0	7.02994299213723	0.88747004060534	516.173751010946	174.401231334361	157.872553392138	no	1.10403734055577	no
WBGene00226600	Bm6339	Bm6339	1	0	122.408428088415	0	6.90037343216765	1.16148399247565	6.46800131013199	4.45612491409988	41.1899706936303	no	0.129322794597808	no
WBGene00226599	Bm6338	Bm6338	0	0	0	0	5.4291226403241	0.274152077503262	5.08893796773147	3.50602020268519	0.0913840258344206	no	4.12872105145583	no
WBGene00220519	Bm258a	Bm258a	1	0	0	0	19.4893951462868	1.09349736445273	10.1490025285538	9.87946589161356	0.364499121484242	no	7.97323041130239	no
WBGene00223018	Bm2757a	Bma-hnd-1	0	0	0	0	0	0.177548512652965	0	0	0.0591828375509882	no	0.944124059177706	no
WBGene00229184	Bm8923	Bma-hda-3	0	15.5143607380454	0	422.460102228223	9.10702936607944	0.766456260062445	2.58678480933856	9.06939163782113	141.075519496095	no	0.0708735162365384	no
WBGene00224642	Bm4381a	Bma-prx-19	0	0	0	0	1.36066781324344	0.229030196654537	2.12568234778088	1.16211672034144	0.0763433988848457	no	2.00876107251786	no
WBGene00225178	Bm4917a	Bma-spt-5	1	0	10.9551348621721	0	8.39598141040771	0.252362066891179	2.34223084412415	3.57940408484395	3.73583230968776	no	0.966969222173723	no
WBGene00224331	Bm4070	Bma-mfap-1	0	8.25165307209567	9.86047483121765	0	56.8042509239194	2.66829757809924	21.6694523269743	28.9084521076631	4.1762574697723	no	5.7780070412492	no
WBGene00227509	Bm7248	Bma-riok-2	1	0	0	0	1.93794408718367	0.217465625370711	3.02752332128228	1.65515580282198	0.0724885417902372	no	2.4756961956814	no
WBGene00227511	Bm7250	Bma-hprt-1	0	0	566.283175631185	0	1.0661098369128	0.179449637322899	8.32756841553823	3.13122608415035	188.820875089503	no	0.0217638132908324	no
WBGene00222834	Bm2573	Bma-mutd-1	0	0	899.133205901637	0	2.55011573461994	0	0	0.850038578206646	299.711068633879	no	0.00615221310812173	no
WBGene00226090	Bm5829a	Bma-ngp-1	0	12.1325195932806	5.94745350142123	0	10.1972185164255	2.45202176189304	13.6546694325009	11.994802514069	2.79982508777142	no	3.41984228586963	no
WBGene00229185	Bm8924a	Bm8924a	2	3.80270641612634	129.078749367592	0	2.87057841389997	118.86258095709	2.80282308940397	3.15870263981009	82.647110108227	no	0.0497172303314405	no
WBGene00231732	Bm11471a	Bma-tep-1	0	4.96645926758622	0.603795661573745	0	6.61656375375287	71.6362600675602	4.73031986119055	5.43778096084321	24.080018576378	no	0.256689640848462	no
WBGene00233841	Bm13580	Bma-trpa-2	7	32.3046701732938	0.450269624936113	342.876949167625	31.9176017195462	5.54208721464487	30.442540595112	31.554937495984	116.289768669069	no	0.277559908808732	no
WBGene00235660	NA	NA	NA	376.427384223101	41.0841331400296	0	512.237721114578	35.5026940366724	517.799438216677	468.821514518119	25.528942392234	NA	17.70977174935	NA
WBGene00223906	Bm3645	Bm3645	0	72.839041511753	40.5129409995097	508.717737380612	65.7989810010685	14.3476898967782	58.4053666409756	65.6811297179324	187.8594560923	no	0.35307276160609	no
WBGene00231736	Bm11475a	Bma-pars-1	0	92.3617834995064	0.881400851109864	0	32.225787637779	2.54610278067217	30.8230045202346	51.8035252191733	1.14250121059401	no	24.6457388019555	no
WBGene00224006	Bm3745a	Bm3745a	0	0	0	0	1.58040298805294	0	0	0.526800996017645	0	no	1.52680099601765	no
WBGene00222991	Bm2730	Bm2730	4	0	361.663914593103	0	2.18303520466035	0	3.41041314710698	1.86448278392244	120.554638197701	no	0.0235653927023627	no
WBGene00226983	Bm6722a	Bm6722a	1	18.4434438607164	0	0	4.79247421630004	0.672231986343889	12.4782817974022	11.9047332914729	0.224077328781296	no	10.5424167150624	no
WBGene00224356	Bm4095	Bm4095	0	8.60598310202776	0	0	4.06029065547643	0.410061511669773	1.26862531606923	4.6449663578578	0.136687170556591	no	4.96615648005747	no
WBGene00227510	Bm7249	Bma-bath-40	0	8.07237054203039	0	0	9.69245455568018	0.761344454511033	4.03783678478016	7.26755396083024	0.253781484837011	no	6.5940947930851	no
WBGene00227910	Bm7649	Bm7649	0	33.1311739026779	453.883164297114	0	14.348395549428	1.2075746270977	11.20778004798	19.562449833362	151.696912974737	no	0.134661856829836	no
WBGene00229287	Bm9026	Bma-klu-1	0	0	0	0	2.4487655637377	0.412180881450279	0.637591051740372	1.02878553849269	0.137393627150093	no	1.78371452948625	no
WBGene00226397	Bm6136a	Bm6136a	2	0	1.09296216651159	0	9.78634157986625	1266.05323461627	5.0961871671157	4.96084291566065	422.382065594261	no	0.0140791105718991	no
WBGene00228317	Bm8056	Bm8056	0	6.14401831587805	0	0	9.275965284815	0.780674067786504	0	5.13999453356435	0.260224689262168	no	4.87214271064565	no
WBGene00228290	Bm8029	Bm8029	3	3.33776266644455	37.0743213414723	0	1.25980136415277	618.980266488913	0.492026322557451	1.69653011771826	218.684862610128	no	0.0122745376521629	no
WBGene00225020	Bm4759a	Bm4759a	0	0	0	0	9.26591185423175	0	2.06793259613597	3.77794815012257	0	no	4.77794815012257	no
WBGene00226472	Bm6211	Bma-rad-54.L	0	0	125.940916706943	0	0.562931152824165	71.5863775178275	0.439715264419275	0.33421547241448	65.8424314082567	no	0.0199606065235034	no
WBGene00255698	NA	NA	NA	0	0	0	0	0	0	0	0	no	1	no
WBGene00255697	NA	NA	NA	0	0	0	0	0	0	0	0	no	1	no
WBGene00268751	Bm17609	Bm17609	0	0	0	0	0	0	0	0	0	no	1	no
WBGene00222976	Bm2715a	Bma-acin-1	0	0	1.52012828478032	0	3.36380534800038	177.284174880414	1.75168437635803	1.70516324145281	59.601434388398	no	0.0446386008640532	no
WBGene00229286	Bm9025	Bma-strl-1.3	0	0	0	0	0	0	0	0	0	no	1	no
WBGene00229285	Bm9024	Bm9024	0	0	0	0	0	0.129174872979084	10917.2010728272	3639.06702427574	0.0430582909930279	no	3489.80210953529	no
WBGene00225439	Bm5178	Bma-ints-13	0	0	0	0	0.475795539100084	2.32251751675005	0.743304257493294	0.406366598864459	0.77417250558335	no	0.792688757400197	no
WBGene00255511	Bm16926a	Bm16926a	0	0	0	0	1.37952043957151	0.232203506608184	0	0.459840146523836	0.0774011688693948	no	1.35496432406488	no
WBGene00225554	Bm5293	Bma-cpt-2	0	0	0	0	0	0.174731559823022	0	0	0.0582438532743406	no	0.944961784475169	no
WBGene00225555	Bm5294	Bma-nuaf-3	1	0	0	0	1.86482404697777	0	0	0.621608015659257	0	no	1.62160801565926	no
WBGene00229284	Bm9023	Bma-prmt-9	0	1985.36647701518	0	0	0	0	0.54527105491773	661.970582690032	0	no	662.970582690032	no
WBGene00225027	Bm4766	Bma-teg-4	0	2.26404567908798	0	0	0.724914191101204	0.0915142025093984	0.849364527852618	1.27944146601393	0.0305047341697995	no	2.21196603026798	no
WBGene00229283	Bm9022	Bm9022	1	0	0	0	0	0	0	0	0	no	1	no
WBGene00234221	Bm13960	Bma-cts-1	0	0	0	0	3.74183648641945	5.56352519373313	0.974271076066238	1.5720358541619	1.85450839791104	no	0.901043365661189	no
WBGene00221083	Bm822a	Bm822a	0	0	1.08561647101682	0	0	0	0	0	0.361872157005606	no	0.734283313493047	no
WBGene00226888	Bm6627	Bm6627	1	0	0	0	0	0.060913056411123	0	0	0.020304352137041	no	0.980099710351609	no
WBGene00225240	Bm4979a	Bm4979a	0	0	0	381.933205675197	0	0	0.584658178021772	0.194886059340591	127.311068558399	no	0.00931241608978383	no
WBGene00229271	Bm9010	Bm9010	0	0	0	0	0	0.0877636204393411	0	0	0.029254540146447	no	0.971576962738212	no
WBGene00225237	Bm4976	Bma-ensa-1	0	0	0	0	0	0.347886120008652	0	0	0.115962040002884	no	0.896087827501208	no
WBGene00220542	Bm281	Bm281	0	0	0	0	0	0	0	0	0	no	1	no
WBGene00220541	Bm280	Bm280	3	0	0	0	0	0	0	0	0	no	1	no
WBGene00225239	Bm4978	Bm4978	1	0	0	0	0	0	0	0	0	no	1	no
WBGene00229270	Bm9009	Bm9009	0	0	0	0	0	0	0	0	0	no	1	no
WBGene00227234	Bm6973	Bm6973	1	0	0	0	0	0.427811122052815	0	0	0.142603707350938	no	0.875194079597766	no
WBGene00223846	Bm3585	Bm3585	1	0	1.60766776509405	0	0.599791495465873	0	0	0.199930498488624	0.535889255031351	no	0.781261080222956	no
WBGene00223100	Bm2839	Bma-cof-2.1	1	0	0	0	0	0	0	0	0	no	1	no
WBGene00268752	Bm17610	Bm17610	0	0	0	0	0	0	0	0	0	no	1	no
WBGene00231372	Bm11111	Bm11111	1	0	0	0	0	0	0	0	0	no	1	no
WBGene00228515	Bm8254	Bm8254	0	0	0	0	0	0.329029296602293	0	0	0.109676432200764	no	0.901163592360659	no
WBGene00268753	Bm17611	Bm17611	0	0	0	0	0	0	0	0	0	no	1	no
WBGene00268754	Bm17612	Bm17612	1	0	0	0	0	0	0	0	0	no	1	no
WBGene00268755	Bm17613	Bm17613	0	0	0	0	0	0	0	0	0	no	1	no
WBGene00231365	Bm11104	Bm11104	0	0	0	0	0	0	0	0	0	no	1	no
WBGene00226583	Bm6322	Bm6322	0	0	6.74383178972407	0	0	0	0	0	2.24794392990802	no	0.307887088441308	no
WBGene00221968	Bm1707	Bm1707	0	0	0	0	0	0	0	0	0	no	1	no
WBGene00231597	Bm11336	Bma-evl-14	1	0	0	0	0	0	0	0	0	no	1	no
WBGene00224007	Bm3746a	Bma-eva-1	1	0	0	0	0	0.0406472446451108	0	0	0.0135490815483703	no	0.986632042004644	no
WBGene00224624	Bm4363	Bma-ept-1	9	0	0	0	0	0	0	0	0	no	1	no
WBGene00234575	Bm14314	Bm14314	0	0	0	0	0	0	0	0	0	no	1	no
WBGene00223550	Bm3289	Bm3289	1	0	0	0	0	2.63417194991938	0	0	0.878057316639794	no	0.532465112294439	no
WBGene00231371	Bm11110	Bm11110	0	0	0	0	0	0	0	0	0	no	1	no
WBGene00268756	Bm17614	Bm17614	0	0	0	0	0	0	0	0	0	no	1	no
WBGene00268757	Bm17615	Bma-dbr-1.2	1	0	0	0	0	0	0	0	0	no	1	no
WBGene00268758	Bm17616	Bm17616	0	0	0	0	0	1.72851040793536	0	0	0.576170135978455	no	0.634449274969431	no
WBGene00268759	Bm17617	Bm17617	0	0	0	0	0	0.183028405018797	0	0	0.0610094683395989	no	0.942498657966668	no
WBGene00268760	Bm17618	Bm17618	0	0	0	0	0	0	0	0	0	no	1	no
WBGene00268761	Bm17619	Bm17619	0	0	0	0	0	0	0	0	0	no	1	no
WBGene00223216	Bm2955	Bma-dbr-1.1	0	0	0	0	0	0	0	0	0	no	1	no
WBGene00231373	Bm11112	Bm11112	3	0	0	0	0	0	0	0	0	no	1	no
WBGene00220980	Bm719	Bm719	2	0	0	0	0	0	0	0	0	no	1	no
WBGene00231374	Bm11113	Bm11113	0	0	0	0	0	0	0	0	0	no	1	no
WBGene00231375	Bm11114	Bm11114	0	6013.83763743534	0	0	0	207.042994022125	0	2004.61254581178	69.0143313407084	no	28.6457430558315	no
WBGene00231377	Bm11116	Bm11116	0	0	0	0	0	0	0	0	0	no	1	no
WBGene00226296	Bm6035	Bma-nmrk-1	0	0	0	0	0	0	0	0	0	no	1	no
WBGene00226383	Bm6122	Bma-hmr-1	0	1.00419394155484	0	0	0	0.027060115902249	0	0.334731313851612	0.00902003863408301	no	1.3227996102619	no
WBGene00226384	Bm6123	Bm6123	1	0	0	0	0.158204071135662	0.0266292104296778	0.247151875047684	0.135118648727782	0.00887640347655926	no	1.12513152732703	no
WBGene00228864	Bm8603	Bma-rskn-1	0	0	0	0	0	0	0	0	0	no	1	no
WBGene00225751	Bm5490	Bm5490	1	0	135.310161583084	0	0.741101595368513	0	0	0.247033865122838	45.1033871943614	no	0.027048638744603	no
WBGene00226169	Bm5908	Bma-lam-3	0	0	0.665800651843249	0	0.0986730407483929	0.0498265021935866	0.308300878258809	0.135657973002401	0.238542384678945	no	0.916931053027132	no
WBGene00225571	Bm5310	Bma-exo-3	0	0	0	0	4.0554969238879	0.227542987585352	6.3356376469573	3.46371152361507	0.0758476625284506	no	4.1490181919664	no
WBGene00225510	Bm5249	Bma-wve-1	0	0	0	0	0	0	0	0	0	no	1	no
WBGene00225509	Bm5248a	Bma-fdps-1	0	0	0	0	0	0	0	0	0	no	1	no
WBGene00225110	Bm4849	Bma-ile-1	1	223.516907813719	659.888523937548	0	0	0.131645430659012	1.22183175932897	74.9129131910159	220.006723122736	no	0.343486895413846	no
WBGene00225111	Bm4850	Bma-ate-1	0	0	0.879128548715137	0	0	0.110414729581663	0	0	0.329847759432267	no	0.751965774207806	no
WBGene00235461	NA	NA	NA	0	0	0	0	0	0	0	0	no	1	no
WBGene00225112	Bm4851a	Bm4851a	0	0	0	0	0	0	0	0	0	no	1	no
WBGene00228087	Bm7826	Bm7826	1	0	0	0	0	0	0	0	0	no	1	no
WBGene00224391	Bm4130	Bm4130	1	0	1144.40034068776	0	0	0.598536989083208	0	0	381.666292558948	no	0.00261324297291211	no
WBGene00234952	Bm14767	Bma-cox-19	0	0	0	0	0	0	0	0	0	no	1	no
WBGene00222230	Bm1969	Bm1969	0	0	0	0	0	0	0	0	0	no	1	no
WBGene00224584	Bm4323	Bma-rpl-7	1	0	284.068225956683	0	2.47167180754312	235.268643020292	3.86133123725335	2.11100101493216	173.112289658992	no	0.0178677853299455	no
WBGene00224582	Bm4321	Bma-rab-11.1	0	0	44.4820661479348	0	8.67097285001402	0	5.41843754837596	4.69647013279666	14.8273553826449	no	0.359912947872704	no
WBGene00234764	NA	NA	NA	0	0	0	0	0	0	0	0	no	1	no
WBGene00223098	Bm2837a	Bm2837a	2	0	214.685553601518	0	0	3.16615370759789	0	0	72.6172357697052	no	0.0135837754507419	no
WBGene00268762	Bm17620	Bm17620	0	27.2202485261234	0	2223.64346862658	2.17888099875233	5.86805436300036	6.80784660573782	12.0689920435379	743.170507663192	no	0.0175618247551579	no
WBGene00227315	Bm7054a	Bma-tln-1	0	0	82.1467013086674	0	0.492209334699345	53.4587123010479	0	0.164069778233115	45.2018045365718	no	0.0251953314358463	no
WBGene00235460	NA	NA	NA	0	0	0	0	4.28286467743985	0	0	1.42762155914662	no	0.411925819422831	no
WBGene00228011	Bm7750a	Bma-lin-44	1	0	0	0	0.777854595682304	0	2.43038273866523	1.06941244478251	0	no	2.06941244478251	no
WBGene00228085	Bm7824	Bm7824	1	0	0	0	0	0	1.00210739252527	0.334035797508424	0	no	1.33403579750842	no
WBGene00228084	Bm7823c	Bm7823c	0	0	0	0	0	0	0	0	0	no	1	no
WBGene00221947	Bm1686	Bma-csn-2	0	0	0	0	0	949.552257437264	0	0	316.517419145755	no	0.00314943351042091	no
WBGene00223842	Bm3581a	Bma-tli-1	0	0	29.7732319490039	0	1.37208144379191	90.763884745984	0	0.457360481263971	40.1790388983293	no	0.0353908328181768	no
WBGene00223847	Bm3586	Bma-ubc-25	2	10.5139585450039	0	0	0	0.566641412671203	1.31478257674209	3.94291370724867	0.188880470890401	no	4.15762040699241	no
WBGene00234232	Bm13971	Bma-fce-1	7	0	177.34822015684	0	0	0.49338601084107	0	0	59.280535389227	no	0.0165891028263613	no
WBGene00223023	Bm2762a	Bma-ssb-1	0	9.04542390895203	451.414552279156	0	4.26761820665059	0.431000172534013	1244.0660917246	419.126377946735	150.615184150563	no	2.77100463453266	no
WBGene00226457	Bm6196a	Bm6196a	0	0	71.6812509817515	0	0.351429722568763	0.0443649899447059	0.137253918715336	0.1628945470947	23.9085386572321	no	0.0466865825850871	no
WBGene00224502	Bm4241a	Bma-kbrl-1	0	5.24829961492491	0	0	1.68042849362591	0.282852923111052	0	2.30957603618361	0.094284307703684	no	3.02442063080355	no
WBGene00223709	Bm3448	Bm3448	0	0	0.650092466925306	0	0	0.160507108461206	1.48970368158036	0.496567893860119	0.270199858462171	no	1.178214502143	no
WBGene00223914	Bm3653	Bm3653	4	0	0	0	3.37013087518573	1.70180053408206	13.1623377163916	5.5108228638591	0.567266844694019	no	4.15425291864081	no
WBGene00223912	Bm3651	Bm3651	0	0	225.25029562061	0	0	0.387265057906483	0	0	75.2125202261721	no	0.0131212036687981	no
WBGene00235440	NA	NA	NA	0	0	0	0	0	0	0	0	no	1	no
WBGene00223955	Bm3694	Bma-lrp-1	1	0	0.803655567249646	0	1.41700856784739	0.357770369589674	1.01461241954487	0.810540329130755	0.38714197894644	no	1.30523072375468	no
WBGene00228278	Bm8017	Bm8017	1	0	0	0	0.444718525962332	0.124759781515273	1.38950934411518	0.611409290025839	0.0415865938384242	no	1.54707184170595	no
WBGene00234772	NA	NA	NA	0	0	0	0	0	0	0	0	no	1	no
WBGene00234773	NA	NA	NA	0	0	0	0	0	0	0	0	no	1	no
WBGene00225116	Bm4855	Bm4855	1	0	91.977815412477	0	0.790201494026468	0.266016439592537	2.46896024245357	1.08638724549335	30.7479439506898	no	0.065717239791461	no
WBGene00228279	Bm8018	Bm8018	3	0	0	0	2.16856432735673	0.730033751836337	0	0.722854775785576	0.243344583945446	no	1.3856615438968	no
WBGene00221993	Bm1732a	Bma-rpia-1	0	0	0	0	0.821378740921343	0.138256033346336	2.5663725906135	1.12925044384495	0.0460853444487788	no	2.03544620440785	no
WBGene00228280	Bm8019	Bm8019	0	0	42.6286341010927	0	4.34432806201319	0.548434177334009	2.54507236754699	2.2964668098534	14.3923560928089	no	0.214162587584201	no
WBGene00228281	Bm8020a	Bma-psf-3	0	0	0	0	2.09899535260193	0	0	0.699665117533976	0	no	1.69966511753398	no
WBGene00228282	Bm8021	Bm8021	1	0	0	0	0	0	0	0	0	no	1	no
WBGene00234189	Bm13928a	Bma-xpo-2	0	0	0	0	2.85937746800525	0.421133876508054	1.11675460943194	1.32537735914573	0.140377958836018	no	2.03912864250659	no
WBGene00227539	Bm7278	Bma-mtm-1	0	5.67966670656258	0	0	0.909272952030456	0	1.42049767374041	2.66981244411115	0	no	3.66981244411115	no
WBGene00228283	Bm8022a	Bm8022a	6	0	2849.845753187	0	2.64434633913245	2103.32671246164	326.35605994677	109.666802095301	1651.05748854955	no	0.0669872585320639	no
WBGene00225113	Bm4852	Bm4852	0	0	0	0	2.47300640355152	0.416261145755493	0	0.824335467850505	0.138753715251831	no	1.60204567802184	no
WBGene00226305	Bm6044a	Bma-lrk-1	2	1.37758258203544	0	0	4.93955550480619	0.590756721699428	3.24915560316987	3.18876456333717	0.196918907233143	no	3.49962268790634	no
WBGene00234220	Bm13959	Bm13959	0	0	206.643620097117	0	6.3325376555512	0.666190495972323	6.18306842605466	4.17186869386862	69.1032701976966	no	0.0737749990732751	no
WBGene00226349	Bm6088a	Bma-aph-1	5	0	0	0	4.93801386455785	1.87014576211659	0	1.64600462151928	0.62338192070553	no	1.62993352813078	no
WBGene00224137	Bm3876	Bm3876	11	4.54030807823452	24.4805956997925	0	0.726869998314142	0.428218496554055	4.54216586740546	3.26978131465137	8.30293806544887	no	0.45897127172214	no
WBGene00222152	Bm1891a	Bma-let-526	2	0	0	0	0.280901655520551	0.0315212676100573	0.292556191790917	0.191152615770489	0.0105070892033524	no	1.17876720361215	no
WBGene00255645	NA	NA	NA	0	0	0	0	3.85457820969586	0	0	1.28485940323195	no	0.43766369107241	no
WBGene00231453	Bm11192	Bm11192	2	123.820777284277	7.96529111898532	0	566.659135662766	26.549390730048	410.685083186697	367.054998711247	11.5048939496778	yes	29.4328764556	yes
WBGene00227498	Bm7237a	Bma-rps-20	0	84.0334915087198	2869.17015231497	0	1.58587529756835	1617.10767273806	2.47750927376401	29.3656253600174	1495.42594168434	no	0.0202921003399864	no
WBGene00227497	Bm7236	Bm7236	1	0	0	0	0	0	0	0	0	no	1	no
WBGene00228285	Bm8024	Bm8024	1	0	0	0	0	0	0	0	0	no	1	no
WBGene00228286	Bm8025	Bma-gon-4	0	2.75719976683916	0	0	2.34151731052015	0.218960361832303	2.43866625174862	2.51246110970264	0.0729867872774343	no	3.27353621810671	no
WBGene00222903	Bm2642	Bma-pry-1	0	0	0	0	8.21526073430925	0.691404163174145	1.06951371937675	3.09492481789533	0.230468054391382	no	3.32794078097442	no
WBGene00227154	Bm6893	Bm6893	0	0	0	0	0	0	1.27905734405264	0.426352448017546	0	no	1.42635244801755	no
WBGene00222523	Bm2262a	Bm2262a	0	0	0	0	0.50230399861564	0.0422743826463683	0.39235834517605	0.298220781263897	0.0140914608821228	no	1.28018115854621	no
WBGene00227616	Bm7355	Bma-ncx-3	11	3.74230876603212	0	0	0.706246393119107	0.0594383686923032	0.551661278537429	1.66673881256289	0.0198127895641011	no	2.61492975951275	no
WBGene00234320	Bm14059	Bma-rps-12	0	0	2748.16537398805	0	2.30382689103491	1758.99061963586	3.59911809991471	1.96764833031654	1502.38533120797	no	0.00197397717585287	no
WBGene00227046	Bm6785	Bm6785	0	0	0	0	0	0.288085067989227	0	0	0.0960283559964091	no	0.912385153658631	no
WBGene00228774	Bm8513	Bma-npp-4	0	0	121.055432057266	0	1.87807867388357	0	0	0.626026224627858	40.3518106857554	no	0.0393217660282039	no
WBGene00221388	Bm1127	Bm1127	2	0	0	0	0	0.191674699636791	0	0	0.0638915665455969	no	0.939945414970203	no
WBGene00227524	Bm7263	Bma-pdpr-1	0	0	0	0	4.2258791837769	0.213392408730164	2.64072588397507	2.28886835591732	0.0711308029100546	no	3.07046380048273	no
WBGene00228773	Bm8512	Bm8512	1	0	0	0	4.4683003506121	11.2816923210611	0	1.48943345020403	3.76056410702035	no	0.522928248468053	no
WBGene00220434	Bm173	Bm173	1	0	0	0	0	0	0	0	0	no	1	no
WBGene00225014	Bm4753a	Bm4753a	0	0	0	0	1.71343354260285	0.865225187361585	1.33839258934352	1.01727537731546	0.288408395787195	no	1.56571113934952	no
WBGene00220433	Bm172a	Bm172a	0	3.4526778130201	0	0	0.325793701762513	0.274191080501911	0.508966195947535	1.42914590357672	0.0913970268339702	no	2.2257215695588	no
WBGene00224680	Bm4419	Bma-unc-73	0	29.164058201181	3.8777884218991	0	36.8480710335811	1.98689598437931	25.1692576290636	30.3937956212753	1.9548948020928	no	10.6243361350938	no
WBGene00225678	Bm5417	Bm5417	0	0	105.449763302564	0	3.59600902592088	0.220104394557936	3.06425986408156	2.22008963000081	35.2232892323741	no	0.0888955613429744	no
WBGene00222380	Bm2119a	Bma-lin-10	0	4.21188013850048	26.2011631014049	0	2.72781885609137	0.338322277895627	2.91575838294084	3.28515245917756	8.8464951264335	no	0.435195712195481	no
WBGene00235831	NA	NA	NA	0	0	0	114.500196484435	4.81822276211983	178.876169565761	97.7921220167322	1.60607425403994	no	37.9084064330033	no
WBGene00222381	Bm2120	Bma-mau-2	0	8.00604253802327	0	0	4.51536681860579	0.560025891819656	2.59886506218416	5.04009147293774	0.186675297273219	no	5.08992770542781	no
WBGene00221429	Bm1168	Bma-ins-17	1	0	0	0	0	0	0	0	0	no	1	no
WBGene00223104	Bm2843	Bm2843	4	0	0	0	2.82020188385308	0.474701749962544	2.20290849218918	1.67437012534742	0.158233916654181	no	2.30900691724944	no
WBGene00226918	Bm6657a	Bm6657a	1	0	0	0	1.21292581021647	0.204161981445755	0	0.404308603405491	0.0680539938152518	no	1.3148292235574	no
WBGene00229074	Bm8813	Bma-eya-1	3	2.26011069686804	0	0	2.53278993645456	0.274065443887366	1.41314717621869	2.06868260318043	0.0913551479624552	no	2.81180934447381	no
WBGene00234826	NA	NA	NA	734.407688176028	0	0	318.056101345653	42.8286467743985	546.566073673159	533.00995439828	14.2762155914662	NA	34.9569532585412	NA
WBGene00220515	Bm254	Bm254	1	0	6.57291884322444	0	6.86839569596118	1.08809547203835	5.04943315640822	3.97260961745647	2.55367143842093	no	1.39928794870975	no
WBGene00225463	Bm5202	Bm5202	0	6.05057899469416	457.475075933834	0	5.70930922385615	0.864901617732803	4.45964022851561	5.40650948235531	152.779992517189	no	0.0416602275594415	no
WBGene00222778	Bm2517a	Bma-unc-11	0	2.39337991594855	0	0	2.93590247395988	0.494176693550751	3.17531661951055	2.83486633647299	0.164725564516917	no	3.29250636656503	no
WBGene00255640	NA	NA	NA	0	0	0	28.9873915150469	0	45.2851062191801	24.7574992447423	0	no	25.7574992447423	no
WBGene00226521	Bm6260	Bm6260	1	13.955356683393	0	0	15.6390512271424	1.88028205351018	10.4708001697031	13.3550693600795	0.626760684503392	no	8.82432769418799	no
WBGene00229176	Bm8915	Bm8915	0	0	774.608352147831	0	0	0.222936854233422	0	0	258.277096334021	no	0.0038568775034094	no
WBGene00227864	Bm7603	Bma-ceh-45	0	5.73054837018141	0	0	2.16293169274022	0.0910171950341407	0	2.63116002097388	0.0303390650113802	no	3.52423793708508	no
WBGene00220516	Bm255	Bm255	1	0	0	0	3.34795896153319	0.563534825978927	821.15668484867	274.834881270068	0.187844941992976	no	232.214552184959	no
WBGene00225934	Bm5673	Bma-rbm-5	1	6.53091290304583	0	0	7.39506112924232	1.71153230516635	10.5900853887157	8.17201980700128	0.570510768388785	no	5.84015085513296	no
WBGene00223780	Bm3519a	Bma-prpf-4	1	15.1707752446721	39.2456754280712	0	21.1423816024725	3.66495654497746	20.211996561103	18.8417178027492	14.3035439910162	no	1.29654397794374	no
WBGene00223779	Bm3518	Bma-nduf-6	0	34.6509525220668	1312.02788122233	0	4.50197364945355	581.470448146781	11.7218983988048	16.9582748567751	631.166109789702	no	0.0284075254567966	no
WBGene00228209	Bm7948	Bm7948	0	0	0	0	0	0	0	0	0	no	1	no
WBGene00223270	Bm3009	Bma-smp-2	1	1.11391528653409	0.143314550816645	0	1.78684843276761	0.22999732283493	0.65681799078629	1.18586057002933	0.124437291217192	no	1.94395951388553	no
WBGene00226428	Bm6167a	Bma-afd-1	0	1.35610927194519	1.45985449117372	0	4.88482066913119	0.347160532727633	2.88291134112433	3.04128042740024	0.602338341300452	no	2.52211428962022	no
WBGene00234498	Bm14237	Bm14237	0	0	106.971533896962	0	0.888890414241127	0.0748098633613947	0.694327683903974	0.527739366048367	35.6821145867746	no	0.0416480724532489	no
WBGene00226936	Bm6675	Bm6675	1	0	0	0	0	0	0	0	0	no	1	no
WBGene00225364	Bm5103a	Bma-hlh-2	0	0	0	0	0.358260940189096	0	0	0.119420313396365	0	no	1.11942031339637	no
WBGene00236692	NA	NA	NA	0	0	0	74.4716725102017	1.56690171125848	29.085556026953	34.5190761790516	0.522300570419493	no	23.3324987648555	no
WBGene00236130	NA	NA	NA	0	0	0	0	0	0	0	0	no	1	no
WBGene00234882	NA	NA	NA	0	0	0	0	0	0	0	0	no	1	no
WBGene00230644	Bm10383	Bma-lsy-12.1	0	9.93404516893913	0	0	5.62424215232592	0.236670786514277	0.732198811157435	5.43016204414083	0.0788902621714257	no	5.95997783055264	no
WBGene00227674	Bm7413	Bm7413	1	0	0	0	0	0	3.48460070582652	1.16153356860884	0	no	2.16153356860884	no
WBGene00223553	Bm3292	Bm3292	11	0	0	0	0.399860996977249	0	0.624676687849699	0.341512561608983	0	no	1.34151256160898	no
WBGene00255379	NA	NA	NA	0	3138.88060875478	0	0	27.1631350347695	0	0	1055.34791459652	no	0.000946657806752958	no
WBGene00234880	NA	NA	NA	0	129.6776519816	0	0	0	0	0	43.2258839938668	no	0.0226111930320868	no
WBGene00223743	Bm3482	Bma-twk-1	6	0	154.542156702987	0	0	0.112035407926053	0.519913296223692	0.173304432074564	51.5513973703045	no	0.0223267979689836	no
WBGene00230643	Bm10382	Bm10382	0	5.37753406033002	52.3811637320269	0	0.860903732965678	0.144908955251724	1.3449336057576	2.5277904663511	17.5086908957596	no	0.190601835981784	no
WBGene00223257	Bm2996	Bma-ceh-17	0	0	0	0	0.86058020657223	0.289708997346551	1.34442818162917	0.735002796067134	0.0965696657821837	no	1.58220936636028	no
WBGene00234270	Bm14009	Bm14009	0	0	0.931501825370599	0	1.36635079337035	0	0	0.455450264456783	0.310500608456866	no	1.11060632483841	no
WBGene00227055	Bm6794	Bma-dnc-6	0	0	2128.20964809402	0	4.25915176011538	0	4.43586285345967	2.89833820452502	709.403216031341	no	0.00548750078343259	no
WBGene00221666	Bm1405	Bm1405	0	28.6658128266089	0	0	6.88377934776164	1.54492112613061	25.0928494380827	20.2141472041511	0.514973708710202	no	14.0029804360183	no
WBGene00222594	Bm2333a	Bma-frm-4	1	4.14495525948358	0	0	4.97682685385838	0.390930852910331	2.59165704963433	3.9044797209921	0.130310284303444	no	4.3390560884921	no
WBGene00268764	Bm17622	Bma-dhhc-11	4	0	0	0	0	0	0	0	0	no	1	no
WBGene00230642	Bm10381	Bm10381	1	0	0	0	0	0	0	0	0	no	1	no
WBGene00227038	Bm6777a	Bma-cutl-10	1	0	0	0	0.950012001530265	0	0	0.316670667176755	0	no	1.31667066717675	no
WBGene00224332	Bm4071	Bma-ces-1	0	0	0	0	2.53262987136552	0	1.58262481367628	1.3717515616806	0	no	2.3717515616806	no
WBGene00230641	Bm10380	Bm10380	0	0	0	0	12.6870023805468	1.06775019659165	0	4.22900079351561	0.355916732197217	no	3.85643208712543	no
WBGene00227517	Bm7256	Bm7256	1	0	0	0	0	0	0	0	0	no	1	no
WBGene00220820	Bm559	Bm559	0	81.1624766671895	0	0	75.5718871654752	6.50811363110583	27.4560505856886	61.3968048061178	2.16937121036861	no	19.6874397678588	no
WBGene00225835	Bm5574	Bma-dnj-19	0	6.27589147859278	136.079222558185	0	0.592191344631162	869.597628688562	0.925141813114876	2.59774154544627	335.225617082249	no	0.0107003790391325	no
WBGene00226350	Bm6089	Bma-syx-17	2	0	0	0	1.39804879712375	0	2.18408021447816	1.1940430038673	0	no	2.1940430038673	no
WBGene00224333	Bm4072a	Bm4072a	1	0	4.5163610425911	0	1.65972381205922	0	0.648219494711945	0.769314435590387	1.5054536808637	no	0.706185250641096	no
WBGene00230640	Bm10379	Bma-tba-5	0	0	0	0	3.472333479437	0.19482326053555	2.7122997659706	2.06154441513587	0.0649410868451834	no	2.87484862116222	no
WBGene00222908	Bm2647	Bm2647	2	15.6270910159165	0	0	85.5249374899838	5.95684977673539	71.4122505671423	57.5214263576808	1.98561659224513	no	19.6011190819628	no
WBGene00234340	Bm14079	Bma-ubl-5	0	0	0	0	0	0	0	0	0	no	1	no
WBGene00234169	Bm13908	Bma-vha-10	0	0	730.651788722779	0	0	0	0	0	243.550596240926	no	0.00408913335469777	no
WBGene00224419	Bm4158a	Bma-trpp-8	0	0	0	0	1.98268738501186	0.259567556208475	0.344158094402619	0.775615159804828	0.0865225187361585	no	1.63421846228297	no
WBGene00230639	Bm10378	Bma-exc-4	0	0	0	0	0	0.182163431460107	0	0	0.0607211438200356	no	0.94275484732834	no
WBGene00268765	Bm17623	Bm17623	0	16.0827517214833	0	0	7.58781951520445	1.53263547105203	2.37079084911546	8.68045402860107	0.510878490350677	no	6.40716913400112	no
WBGene00224805	Bm4544	Bm4544	0	0	204.861943203296	0	1.07942678750351	583.592043815371	1.68631788419289	0.921914890565469	262.817995672889	no	0.00728500300240501	no
WBGene00224806	Bm4545	Bma-mars-1	1	0	80.505700601637	0	4.29751769615045	0.33757096794534	8.05647704787615	4.11799824800887	26.9477571898608	no	0.183127333375633	no
WBGene00222543	Bm2282a	Bm2282a	0	0	0	0	0.689137505172646	0	0	0.229712501724215	0	no	1.22971250172422	no
WBGene00230638	Bm10377	Bm10377	0	15.517181808004	0	0	19.0345595178729	1.97165125815645	41.1735428667993	25.2417613975587	0.65721708605215	no	15.8348363762483	no
WBGene00230637	Bm10376	Bm10376	insdc=CDP97820.1	0	0	0	3.15862610991545	0.53166595995805	0	1.05287536997182	0.177221986652683	no	1.74383029984767	no
WBGene00233394	Bm13133	Bm13133	0	0	0	0	0	0	0	0	0	no	1	no
WBGene00268766	Bm17624	Bm17624	1	0	0	0	0	0	0	0	0	no	1	no
WBGene00230636	Bm10375	Bm10375	insdc=CDP97818.1	0	0	0	0	0	19.738060090015	6.57935336333835	0	no	7.57935336333835	no
WBGene00226212	Bm5951	Bma-rocf-1	1	1.9902936691913	0	0	0.15931570402732	0.107265290376955	0.497777012844751	0.882462128687789	0.0357550967923182	no	1.81747802595197	no
WBGene00233248	Bm12987	Bma-oxa-1.3	5	0	64.1004024054816	0	0.70744637926744	0.357236164012591	2.2103944339297	0.972613604399048	21.4858795231647	no	0.0877267710327666	no
WBGene00222120	Bm1859	Bma-oxa-1.1	4	0	0	0	2.25394087567786	0.885237777817291	4.69491258702785	2.31628448756857	0.29507925927243	no	2.56068071805246	no
WBGene00233247	Bm12986	Bma-oxa-1.2	5	0	0	0	0.886567529883354	0.447686203216709	1.38502647747395	0.757198002452436	0.14922873440557	no	1.52902372682261	no
WBGene00225149	Bm4888	Bma-mks-6	0	0	0	0	1.27683519915735	0.035819888576302	0	0.425611733052449	0.0119399628587673	no	1.40879082295065	no
WBGene00233246	Bm12985	Bma-aex-5	1	0	0	0	0.375472033069143	0.0632001673995058	0.586575404380263	0.320682479149802	0.0210667224665019	no	1.29343406272172	no
WBGene00223413	Bm3152	Bma-lin-28	0	0	0	0	3.23904374779166	0	2.53007311974203	1.92303895584456	0	no	2.92303895584456	no
WBGene00224038	Bm3777	Bma-thoc-3	0	0	41.9640076164871	0	2.21185183163751	0.744606222091924	0	0.737283943879171	14.2362046128597	no	0.114023405961145	no
WBGene00224823	Bm4562	Bm4562	3	0	0	0	3.51227596578022	0	2.7434995332172	2.08525849966581	0	no	3.08525849966581	no
WBGene00227224	Bm6963	Bm6963	5	0	0	0	1.89726920438169	0.479027946523926	4.44596941754171	2.11441287397447	0.159675982174642	no	2.68558883847389	no
WBGene00223881	Bm3620	Bma-cox-5B	0	0	791.099235534482	0	5.10402064566576	0.286372823900138	2.65789256412721	2.58730440326432	263.795202786127	no	0.0135474674975957	no
WBGene00225848	Bm5587	Bma-nra-2	2	5.85999205263328	1.25728708052624	478.70735057897	13.1339840293494	1.73700779625786	8.06078601074713	9.01825403090993	160.567215151918	no	0.0620067259405938	no
WBGene00255615	NA	NA	NA	0	0	0	0	0	0	0	0	no	1	no
WBGene00221919	Bm1658	Bm1658	0	0	0	0	0	0	0	0	0	no	1	no
WBGene00269247	Bm18107	Bm18107	0	0	0	0	0	0	0	0	0	no	1	no
WBGene00227710	Bm7449c	Bma-gcna-1	0	0	22.9321184680917	0	1.94109254476686	0	0.758110487670105	0.899734344145655	7.64403948936389	no	0.219773908539311	no
WBGene00227455	Bm7194	Bma-mrpl-15	0	0	2.80918788426961	0	2.096113436786	2233.53843079905	4.91193142972342	2.33601495550314	745.449206227774	no	0.00446917878359318	no
WBGene00227452	Bm7191	Bm7191	3	137.308538834563	2.6143993658473	495.55752449672	272.411408938796	35.4725814887193	138.063879817509	182.594609196956	177.881501783762	yes	1.02634765118917	no
WBGene00233244	Bm12983	Bm12983	2	25.7784988135494	1.94181446603261	0	33.3249543706676	3.90213548593064	24.8989290126336	28.0007940656169	1.94798331732108	no	9.83750277527714	no
WBGene00226547	Bm6286	Bma-gpap-1	1	95.0464762025338	0	0	46.0344357210814	4.36739490133668	27.4590611175511	56.1799910137221	1.45579830044556	no	23.2836674751944	no
WBGene00233243	Bm12982	Bm12982	0	0	0	0	8.65240779479359	0.485463250591418	4.50569696639197	4.38603492039519	0.161821083530473	no	4.63585572404008	no
WBGene00222678	Bm2417	Bma-rpl-22.1	0	20.5964587479883	0	0	21.4327221641131	3.05258173554028	23.1804971359518	21.7365593493511	1.01752724518009	no	11.2695178732625	no
WBGene00233242	Bm12981a	Bma-rpl-22.2	0	19.124406893395	2876.0565040766	0	126.320153725933	22.7811950927651	1212.24196868837	452.562176435901	966.279233056456	no	0.468905111301431	no
WBGene00234925	NA	NA	NA	744.751458432028	43.9773819527077	0	580.564376540798	54.2898339393783	302.325920392836	542.547251788554	32.7557386306953	NA	16.1023658150465	NA
WBGene00233241	Bm12980a	Bm12980a	1	54.5215397608259	182.614314695684	0	31.5055572087675	2.87881234214707	15.4688511416932	33.8319827037622	61.8310423459437	no	0.554375375661915	no
WBGene00234179	Bm13918	Bma-ufd-1	0	0	1.73721433283019	0	23.7738904036145	1.29783778104238	9.03414997806875	10.9360134605611	1.01168403795752	no	5.9333440218971	no
WBGene00234084	Bm13823	Bma-imb-1	0	3.05884451067788	0	0	6.06126575793582	62.8178677229235	3.60728348002543	4.24246458287971	20.9392892409745	no	0.238953255289999	no
WBGene00233240	Bm12979	Bm12979	1	0	0	0	9.1268272560057	0.139658630786082	10.369633018305	6.4988200914369	0.046552876928694	no	7.16525677464439	no
WBGene00268767	Bm17625	Bma-nhr-2.6	0	0	0	0	0	0	1.05035918711545	0.350119729038484	0	no	1.35011972903848	no
WBGene00268768	Bm17626	Bma-nhr-2.3	0	27.1615806913467	0	0	8.9703567475215	0	0	12.0439791462894	0	no	13.0439791462894	no
WBGene00235062	Bm14727	Bm14727	0	11.0500120513541	0	0	16.8057453318213	2.23324345868822	6.90908341312326	11.5882802654329	0.744414486229405	no	7.21633554685891	no
WBGene00224016	Bm3755a	Bma-nhr-2.4	0	0	0	0	3.72964809395554	0.627781467377176	1.45664633196874	1.72876480864143	0.209260489125725	no	2.25655665853622	no
WBGene00225641	Bm5380	Bma-nhr-2.2	0	0	0	0	0	0	2.08601947015465	0.695339823384883	0	no	1.69533982338488	no
WBGene00233239	Bm12978	Bma-spd-1.1	0	0	0	0	0	0	0	0	0	no	1	no
WBGene00268769	Bm17627	Bm17627	0	0	0	0	37.3878192602237	1.96662153555911	18.2526703638532	18.5468298746923	0.655540511853038	no	11.8069172785229	no
WBGene00268770	Bm17628	Bm17628	0	40.8161741016395	0	0	49.4944886385826	4.76057517214464	33.1380013089793	41.1495546830671	1.58685839071488	no	16.2937232414253	no
WBGene00268771	Bm17629	Bma-nhr-2.7	0	7.11488488646095	0	0	2.68543410107148	0.113004345051183	0	3.26677299584414	0.0376681150170611	no	4.11188600102065	no
WBGene00268772	Bm17630	Bma-nhr-2.1	0	0	0	0	1.5426095855094	0.129827491064192	26.5090988915241	9.35056949234449	0.0432758303547307	no	9.9212204396848	no
WBGene00233238	Bm12977	Bm12977	0	0	0	0	1.50658153268994	0	4.70726762015161	2.07128305094718	0	no	3.07128305094718	no
WBGene00268773	Bm17631	Bm17631	0	276.786943525439	3.86434915673545	1446.19386480602	289.084654490406	11.4492422070174	185.960374301039	250.610657438961	487.169152056591	no	0.515416954100765	no
WBGene00268774	Bm17632	Bma-nhr-111	0	0	0	0	0	0	0	0	0	no	1	no
WBGene00268775	Bm17633	Bma-nhr-2.5	0	0	0	0	0	0	0	0	0	no	1	no
WBGene00226626	Bm6365	Bma-spd-1.2	0	29.3242172857614	0	0	45.4488826821394	3.47729202498499	30.6598757036488	35.1443252238499	1.15909734166166	no	16.740479702519	no
WBGene00220543	Bm282	Bm282	1	5941.27567962629	68.9671407542594	26258.9807362532	6329.67378318451	710.281827404631	4582.44569224647	5617.79838501909	9012.74323480401	yes	0.623359046142305	no
WBGene00225291	Bm5030a	Bma-tom-1	0	8.66267409567167	0.232326855682403	0	16.6419664837332	1.80911316427815	10.2911346608614	11.8652584134221	0.680480006653517	no	7.65570453827758	no
WBGene00222214	Bm1953	Bma-rpl-14	0	4777.70582772913	2373.57168857897	0	4.09172828413705	63.1333536430233	2.13074651061062	1594.64276750796	812.235014073997	no	1.96209304800392	no
WBGene00223972	Bm3711a	Bm3711a	1	101.56287078793	2.60198641353508	0	77.2128326953202	14.0796619067283	138.718243327199	105.831315603483	5.56054944008781	no	16.2838976489831	no
WBGene00229305	Bm9044	Bm9044	0	7.71950383188227	93.4220703605473	0	22.4510189185167	39.4887981727252	19.3066561862667	16.4923929788886	44.3036228444242	no	0.386114661049486	no
WBGene00234283	Bm14022	Bm14022	0	31.6063081582032	262.597060287683	0	1204.54480461809	2.30399175714038	8.55355263912785	414.901555138473	88.3003506816078	no	4.65733395181539	no
WBGene00222619	Bm2358a	Bma-dao-5	0	59.7878322300372	46.3641761374706	0	118.88184149971	8.0041671515488	66.3290453744294	81.6662397013923	18.1227810963398	no	4.32291931204584	no
WBGene00226999	Bm6738	Bm6738	0	1.42514958880253	1.26156934317645	0	4.16877807389452	0.45270752360043	2.7310942560983	2.77500730626512	0.571425622258961	no	2.40228188518299	no
WBGene00229277	Bm9016	Bm9016	0	0	0	0	6.60982503977322	0.606860909424696	6.57115290978918	4.3936593165208	0.202286969808232	no	4.48616632465135	no
WBGene00229276	Bm9015	Bm9015	0	36.6778730356469	0	0	27.8119967954358	2.56720194181507	41.3464995274433	35.2787897861754	0.855733980605023	no	19.5495637657868	no
WBGene00221454	Bm1193	Bm1193	1	0	77.7866540632123	0	2.50273653517891	473.502284994333	3.9098616298527	2.13753272167721	183.762979685848	no	0.0169813927390213	no
WBGene00229275	Bm9014	Bm9014	1	26.5631208922523	0	0	2.12628034325785	0.357899555217814	0	9.56313374517004	0.119299851739271	no	9.43726895769357	no
WBGene00268776	Bm17634	Bm17634	1	0	0	0	12.7134152932058	1.87245298180923	2.48266716954561	5.06536082091715	0.62415099393641	no	3.73448087250601	no
WBGene00220619	Bm358	Bm358	2	73.3198560354027	10216.4838486514	0	13.8368817503849	38990.6307000111	6847.01229123322	2311.38967633967	16402.3715162208	no	0.140970389779504	no
WBGene00224787	Bm4526	Bm4526	7	82.7632050172296	0	0	39.0132459895536	3.84094903569822	43.6984535101185	55.1583015056339	1.28031634523274	no	24.6274169910851	no
WBGene00226860	Bm6599	Bma-mib-1	0	18.6417604613693	0	0	14.5320185913614	1.35892057454464	13.2430797140172	15.4722862555826	0.452973524848212	no	11.336948660027	no
WBGene00229594	Bm9333	Bm9333	0	12.7545613914203	6.19291327180428	0	6.63621290368996	0.515547687431457	5.58240386518203	8.32439272009742	2.23615365307858	no	2.88131952919697	no
WBGene00235444	NA	NA	NA	0	0	0	0	0	0	0	0	no	1	no
WBGene00227695	Bm7434a	Bm7434a	0	0	0	0	4.3785925997872	0.184253260501714	1.71009722338204	2.02956327438975	0.0614177535005714	no	2.85426097726197	no
WBGene00229593	Bm9332	Bm9332	2	0	0	0	0	0	1.46080987803807	0.486936626012689	0	no	1.48693662601269	no
WBGene00235442	NA	NA	NA	0	0	0	19.4068129634636	0	0	6.46893765448786	0	no	7.46893765448786	no
WBGene00255390	NA	NA	NA	0	0	0	0	0	0	0	0	no	1	no
WBGene00235443	NA	NA	NA	0	0	0	0	0	0	0	0	no	1	no
WBGene00222411	Bm2150a	Bma-tiam-1.2	1	67.0329616924402	0	0	25.0509671674736	5.28289984731358	23.3913260842942	38.4917516480693	1.76096661577119	no	14.3035962197024	no
WBGene00229592	Bm9331	Bma-tiam-1.1	0	3.62132673429819	0	0	6.08735221815984	0.82946619702316	5.43421274630161	5.04763056625321	0.276488732341053	no	4.73770775489885	no
WBGene00227067	Bm6806a	Bma-mod-5	11	0	0	0	6.08055328726902	0.682326869985991	2.63868077247029	2.90641135324644	0.22744228999533	no	3.18256213354136	no
WBGene00220618	Bm357	Bm357	1	7.14210486984058	0	0	3.36963497599868	0.340310024399281	5.26416037568456	5.25863340717461	0.11343667479976	no	5.6210052613007	no
WBGene00220617	Bm356	Bm356	1	0	0	0	5.27043482091761	0.443564811242331	4.11682783810728	3.1290875530083	0.147854937080777	no	3.59722071110256	no
WBGene00229590	Bm9329	Bm9329	1	0	0	0	4.54237107050749	0	2.02749979672158	2.18995695574302	0	no	3.18995695574302	no
WBGene00226904	Bm6643	Bm6643	0	0	0	0	14.1795908959053	3.58010360033671	11.0759238121214	8.41850490267557	1.1933678667789	no	4.29408356223766	no
WBGene00227217	Bm6956	Bm6956	0	7.24660267175822	7.3790299115406	0	19.8298339686391	0.920771145941084	14.9553082945396	14.010581644979	2.76660035249389	no	3.9851803324556	no
WBGene00234287	Bm14026	Bma-emc-3	3	0	0	0	2.03375126970578	0	0	0.677917089901925	0	no	1.67791708990193	no
WBGene00268777	Bm17635	Bm17635	0	0	53.4998587535328	0	100.501739860946	12.6874831353626	134.577682431921	78.3598074309556	22.0624472962984	no	3.44108352471739	no
WBGene00229589	Bm9328	Bm9328	0	15.3309364167519	0	0	65.0980270600074	8.27894245923306	49.719213271595	43.3827255827848	2.75964748641102	no	11.8050231419842	no
WBGene00229588	Bm9327	Bma-mau-8	0	83.703990497822	11.0888428634346	0	41.1659668921955	4.15748034944084	56.9610812176538	60.6103462025571	5.08210773762516	no	10.1297689650288	no
WBGene00224113	Bm3852	Bma-nprl-3	0	21.3655572822671	0	0	8.55117225425207	0.86360975571976	13.3589372341868	14.425222256902	0.287869918573253	no	11.9773138843018	no
WBGene00234178	Bm13917	Bm13917	1	1389.9531881488	96.5704353682587	0	17.6891195083775	385.705943158817	10.3629580050972	472.668421887424	160.758792842358	no	2.92823909949079	no
WBGene00227211	Bm6950	Bm6950	0	14.5671502687385	0	0	0	308.181162984087	0	4.85571675624616	102.727054328029	no	0.0564531287828525	no
WBGene00220615	Bm354	Bma-popl-7	2	24.2034527926867	0	0	54.2471320061622	3.261064475208	45.4000430369952	41.283542611948	1.087021491736	no	20.2602334376424	no
WBGene00229587	Bm9326	Bma-epg-6	0	0	0	0	3.9837702459067	0.335277895885404	2.07452791610045	2.01943272066905	0.111759298628468	no	2.71590507441134	no
WBGene00222159	Bm1898a	Bma-swsn-9	1	5.97503784481113	0	0	28.2185112472083	2.25413930391571	15.690892067172	16.6281470530638	0.751379767971903	no	10.0652910210772	no
WBGene00224320	Bm4059a	Bma-haf-2	7	12.0380733014752	262.896856038111	0	27.9445040862497	2.35183606314286	12.0429990029547	17.3418587968932	88.4162307004179	no	0.205128964319086	no
WBGene00229586	Bm9325	Bm9325	1	0	0	0	9.59679979595447	0.480239668214458	6.88842424423591	5.49507468006346	0.160079889404819	no	5.59881671890353	no
WBGene00226751	Bm6490a	Bma-sydn-1	2	44.3564392418665	209.179301543101	0	46.0667810101486	2.04053902048484	20.8325872442919	37.0852691654357	70.4066135211951	no	0.533357728190416	no
WBGene00229584	Bm9323	Bm9323	0	0	415.780769884197	0	2.38790816443035	0.803874496286937	0	0.795969388143449	138.861548126828	no	0.0128410518273031	no
WBGene00226818	Bm6557	Bma-edc-4	0	6.95084414942526	0	0	6.55879687724102	0.662393505890739	4.61087076068123	6.0401705957825	0.220797835296913	no	5.76686032054623	no
WBGene00229583	Bm9322	Bm9322	6	0	0	0	6.38228192217476	0.311887115771489	6.4326591590672	4.27164702708065	0.10396237192383	no	4.77520535223856	no
WBGene00229582	Bm9321	Bma-eme-1	1	7.04642394112209	0.755920631419839	0	12.9729286657242	0.85446314993258	3.52465358750268	7.84800206478299	0.53679459378414	no	5.75743960876127	no
WBGene00226437	Bm6176	Bm6176	0	0	0	0	5.49326279985296	0.11557955651262	1.07272065706603	2.18866115230633	0.0385265188375398	no	3.07037046668343	no
WBGene00226335	Bm6074	Bma-ccb-1	0	0	220.576618826917	0	4.27771593341601	0.240011096494138	1.67069896854696	1.98280496732099	73.6055433078036	no	0.03998100992328	no
WBGene00226761	Bm6500a	Bm6500a	0	0	0	0	0	0.472374780599983	0	0	0.157458260199994	no	0.863962040261575	no
WBGene00228313	Bm8052	Bm8052	0	76.6983410213289	0	0	214.879725305911	12.400787805992	86.3209397368285	125.966335354689	4.13359593533068	no	24.7324364741828	no
WBGene00222309	Bm2048	Bma-tol-1	2	5.0362073392849	0.192978622907432	0	1.98146199107799	0.142938623350897	1.54775424840585	2.85514119292291	0.111972415419443	no	3.46693959262355	no
WBGene00229708	Bm9447	Bm9447	2	3.76625608227432	0	0	9.04424932736455	0.456703579347851	9.41949286812856	7.40999942592247	0.152234526449284	no	7.2988608073034	no
WBGene00229707	Bm9446	Bma-eif-3.J	0	22.4607795906694	0	0	6.35817842579001	0.891850580679283	4.96648319016459	11.2618137355413	0.297283526893094	no	9.45191508359591	no
WBGene00225241	Bm4980a	Bma-nhr-49	0	0	0	0	66.3769254982233	4.02216856663916	29.034972451254	31.8039659831591	1.34072285554639	no	14.0144596381539	no
WBGene00222621	Bm2360a	Bm2360a	2	39.5302113263618	1.80584746311535	687.569663291124	47.1610106143599	4.30932544773294	31.5756698262597	39.4222972556605	231.228278733991	no	0.174062769082325	no
WBGene00224203	Bm3942	Bma-flp-22	1	0	0	0	0	0	0	0	0	no	1	no
WBGene00229706	Bm9445	Bm9445	0	0	0	0	0.918205264510306	0.30910811625468	0.956301360950341	0.624835541820216	0.10303603875156	no	1.47305752916218	no
WBGene00255689	NA	NA	NA	0	0	0	0	0	0	0	0	no	1	no
WBGene00220638	Bm377	Bm377	1	0	0	0	3.68562864220285	0	0	1.22854288073428	0	no	2.22854288073428	no
WBGene00224088	Bm3827	Bm3827	0	0	0	0	3.39259841435363	0.285524311829323	0	1.13086613811788	0.0951747706097743	no	1.94568592639461	no
WBGene00229705	Bm9444	Bm9444	0	20.2916992873899	0	0	5.74415701426932	2.57831318374305	20.9386820561928	15.6581794526173	0.85943772791435	no	8.95871865055792	no
WBGene00229704	Bm9443	Bma-mppe-1.2	1	0	3.85073746996806	0	1.43663985551362	0.120908977719444	1.12218425072623	0.852941368746616	1.32388214922917	no	0.797347391028945	no
WBGene00225843	Bm5582	Bm5582	2	0	0	0	0	0	3.02155691834056	1.00718563944685	0	no	2.00718563944685	no
WBGene00224980	Bm4719	Bma-spe-41.2	6	0	0	0	0.50263475190709	0	0.785233404590699	0.429289385499263	0	no	1.42928938549926	no
WBGene00268778	Bm17636	Bma-spe-41.1	3	0	0	0	2.50547475895919	0	0	0.835158252986398	0	no	1.8351582529864	no
WBGene00221503	Bm1242	Bm1242	1	0	0	0	0	0	0	0	0	no	1	no
WBGene00222662	Bm2401	Bm2401	0	0	0	0	3.03714049030332	0.511217269190432	2.37236299158835	1.80316782729722	0.170405756396811	no	2.39503933740637	no
WBGene00234020	Bm13759a	Bma-nsf-1	0	0	0	0	1.46795123697994	0.123544173387688	2.86660528150258	1.44485217282751	0.0411813911292293	no	2.34815200661232	no
WBGene00229703	Bm9442	Bm9442	3	0	900.112770652514	0	2.15834489131829	0.423846174487449	1.12394702837425	1.09409730656418	300.178872275667	no	0.00695300201751026	no
WBGene00232399	Bm12138a	Bm12138a	4	0	0	0	0.618919980996947	0	0	0.206306660332316	0	no	1.20630666033232	no
WBGene00220637	Bm376a	Bm376a	0	0	0	0	4.72815677155273	1.59170469774089	4.92432676024119	3.21749451059797	0.530568232580298	no	2.75550898079724	no
WBGene00225456	Bm5195a	Bm5195a	0	32.9543895328459	1753.91178035824	0	15.6514578705764	1684.09337585516	16.8102337908874	21.8053603981032	1146.0017187378	no	0.0198825860724943	no
WBGene00225533	Bm5272a	Bm5272a	6	0	0	0	0.600027231675279	0.0504988629594637	1.87476661407846	0.824931281917914	0.0168329543198212	no	1.79472082819999	no
WBGene00221337	Bm1076a	Bm1076a	0	0	0	0	0.963806367714101	0	0	0.321268789238034	0	no	1.32126878923803	no
WBGene00227287	Bm7026	Bma-trp-4	8	1.88461667990485	0	0	5.27998271008594	0.279317261572164	1.64971434382125	2.93810457793735	0.0931057538573879	no	3.60267482266966	no
WBGene00227512	Bm7251	Bm7251	1	0	0	0	3.80778837660243	1.02549470161513	8.32812229438197	4.0453035569948	0.341831567205042	no	3.76001256812275	no
WBGene00229702	Bm9441	Bm9441	3	14.3474029436098	0	0	7.45626025132667	0.575232130059076	1.45605347631877	7.75323889041842	0.191744043353025	no	7.34489837749958	no
WBGene00228076	Bm7815	Bm7815	1	0	286.218112988965	0	1.20908338420734	306.493916779407	1.88887190671342	1.03265176364025	197.570676589457	no	0.0102364145530044	no
WBGene00228074	Bm7813a	Bma-cfi-1	0	3.74407553997588	0	0	0.899098519705027	0.100891982978559	1.1705023528711	1.93789213751733	0.0336306609928531	no	2.8423035890744	no
WBGene00228275	Bm8014	Bma-unc-63.1	6	0	0	0	0.334453619057792	0	0	0.111484539685931	0	no	1.11148453968593	no
WBGene00224939	Bm4678	Bma-hxk-2	0	0	373.483392781408	0	0	197.789925167502	0.634762844449117	0.211587614816372	190.424439316304	no	0.00632932565530143	no
WBGene00222775	Bm2514	Bm2514	4	2.68045862024722	0	0	2.7822004889083	0.298012452704562	0.39513180818591	1.95259697244714	0.0993374842348539	no	2.68579668644899	no
WBGene00229356	Bm9095	Bm9095	0	0	0	0	1.37703182783446	0.115892309371493	0	0.459010609278153	0.0386307697904977	no	1.40474425726137	no
WBGene00226762	Bm6501	Bm6501	0	0	0	0	2.38790816443035	0	11.1914183252822	4.52644216323753	0	no	5.52644216323753	no
WBGene00234146	Bm13885	Bma-atp-3	0	0	211.180959179156	0	11.2310148586989	238.57173617637	8.77274004736446	6.66791830202112	149.917565118509	no	0.0508086536911714	no
WBGene00229355	Bm9094	Bm9094	1	19.2779522917491	0	0	3.08625866534866	0.259742466960638	0	7.45473698569926	0.0865808223202125	no	7.78104749506399	no
WBGene00229354	Bm9093	Bm9093	4	0	0.866470288979262	0	11.6375129120262	2.06767323501472	4.04011676037857	5.22587655746824	0.978047841331327	no	3.14748532739123	no
WBGene00222935	Bm2674	Bma-dli-1	0	30.7069416658966	6.28435929447878	0	11.3037360060128	636.945545626572	8.31015886484373	16.7736121789177	214.409968307017	no	0.08251062993327	no
WBGene00226726	Bm6465a	Bm6465a	0	5.1006457225133	30.5741847529047	0	15.401455601101	4.45569149922809	7.51896467279366	9.34035533213599	11.6766254173776	no	0.815702522688809	no
WBGene00221464	Bm1203	Bm1203	0	0	0	0	0	2.15339564787478	0	0	0.717798549291594	no	0.58214043806964	no
WBGene00227317	Bm7056	Bm7056	0	0	25.0041171544244	0	12.2242202652422	1.37173601768536	4.24379998969778	5.48934008497999	8.79195105736993	no	0.662721866863885	no
WBGene00227431	Bm7170	Bma-atg-4.1	0	0	0	0	27.5904087914302	5.43268581498394	27.6507832017999	18.41373066441	1.81089527166131	no	6.90660049135733	no
WBGene00227437	Bm7176	Bm7176	10	0	0	0	0.534423320814167	0	0.834894607074732	0.456439309296299	0	no	1.4564393092963	no
WBGene00227436	Bm7175	Bma-eipr-1	0	8.506833541765	0	0	35.4089218982494	10.0863182412499	24.4671537318615	22.7943030572919	3.36210608041665	no	5.45477405148735	no
WBGene00229353	Bm9092	Bma-col-48	1	0	0	0	14.6353634604165	3.6227238812931	9.41453524030323	8.01663290023992	1.2075746270977	no	4.08440683706086	no
WBGene00229352	Bm9091	Bm9091	1	35.121378216669	17.8429919093139	0	6.62808662717425	0.557826079550776	5.17731315675141	15.6422593335316	6.13360599628821	no	2.33293783567398	no
WBGene00234172	Bm13911	Bma-rps-27	0	0	2.51560472423323	0	30.0328384221469	9.47847100744884	14.6619811119476	14.8982731780315	3.99802524389402	no	3.18091094026668	no
WBGene00234301	Bm14040	Bma-vps-28	0	0	0	0	3.82091868134934	0	1.98972379939668	1.93688082691534	0	no	2.93688082691534	no
WBGene00226513	Bm6252	Bma-cox-4	1	0	1424.41896427616	0	5.36803546574942	459.730284363163	5.03167846879778	3.46657131151574	628.049749546441	no	0.00710050566705771	no
WBGene00223895	Bm3634	Bm3634	1	11.8467791609939	0	0	26.0227719282807	5.62323295333395	22.524333391266	20.1312948268469	1.87441098444465	no	7.35152173478406	no
WBGene00234350	Bm14089	Bm14089	0	8.6366093764122	0	0	26.07833656585	4.80107606189876	20.3702399505493	18.3617286309372	1.60035868729959	no	7.44579150772615	no
WBGene00269329	Bm18189	Bm18189	0	0	0	0	6.65215375363458	0.559851591822202	2.5980562028433	3.08340331882596	0.186617197274067	no	3.44121366874378	no
WBGene00304774	Bm18591	Bm18591	3	6.17227210376606	0	0	2.47033865122838	0.665299367369296	0.771849706864126	3.13815348728619	0.221766455789765	no	3.38702496510369	no
WBGene00223092	Bm2831	Bma-bbs-9	0	8.40931252232678	0	0	3.70224033312401	1.01972968510473	1.577391266012	4.56298137382093	0.339909895034908	no	4.15175781180122	no
WBGene00223093	Bm2832	Bm2832	1	0	0	0	2.92092337970498	1.47496615166933	4.5631675909633	2.49469699022276	0.491655383889778	no	2.34283134560857	no
WBGene00222728	Bm2467	Bm2467	0	11.8365496737368	108.106865429009	0	41.6973565477377	181.229721710948	23.8462784984432	25.7933949066392	96.4455290466526	no	0.274957662693911	no
WBGene00223090	Bm2829	Bm2829	0	0	0	0	1.99304084394143	1.67736214521143	6.22719476295078	2.74007853563074	0.559120715070476	no	2.39883833206698	no
WBGene00234281	Bm14020	Bm14020	1	0	203.70499717353	0	59.4548835055483	11.6754857065647	46.4412383121838	35.2987072725774	71.7934942933648	no	0.498653178075092	no
WBGene00224516	Bm4255a	Bm4255a	0	0	162.177090922938	0	10.8121054281808	1.27393991821865	5.06731358543233	5.29313967120439	54.4836769470522	no	0.113423262795108	no
WBGene00227520	Bm7259a	Bm7259a	0	25.088683662302	0.189064130707977	0	48.9477073678542	5.92832494860883	29.2440604194705	34.4268171498756	2.0391296931056	no	11.6568954692006	no
WBGene00221946	Bm1685a	Bma-vps-34	0	7.44215650037359	2.86430670910392	0	10.1824768416088	1.35932687554439	7.67944303563526	8.43469212587254	1.40787786154944	no	3.91826025585926	no
WBGene00221948	Bm1687	Bm1687	0	0	0	0	2.48643206263703	0.418520978251451	0	0.828810687545676	0.139506992750484	no	1.6049139664614	no
WBGene00223173	Bm2912a	Bm2912a	1	5.06551290914596	0	0	19.5971949733327	2.81590977539877	13.4409144319921	12.7012074381569	0.93863659179959	no	7.06744497453151	no
WBGene00220556	Bm295a	Bm295a	0	0	0	0	2.87111826691161	0.386617673991561	1.79414412804174	1.55508746498445	0.128872557997187	no	2.26339762348162	no
WBGene00220555	Bm294a	Bm294a	0	71.5525758439431	4.15296043784106	0	24.7902996448033	13523.8841435716	24.2051650291964	40.1826801726476	4509.34570133649	no	0.00913071478322483	no
WBGene00222683	Bm2422	Bma-ceh-2	0	4.66620146810564	0	0	0	0.251481207613496	0	1.55540048936855	0.0838270692044987	no	2.35775665876674	no
WBGene00228955	Bm8694	Bma-unc-38.2	5	0	0	0	5.50583522950863	1.56835066789918	5.95481977470631	3.82021833473831	0.522783555966395	no	3.16539951843602	no
WBGene00223742	Bm3481a	Bm3481a	2	1.61310861014692	0	0	5.03581354710231	0.912840624794058	3.22753731384514	3.29215315703146	0.304280208264686	no	3.29082135099027	no
WBGene00228953	Bm8692a	Bm8692a	0	0	0	0	29.1926846560883	5.45974250665136	17.7355975490132	15.6427607350338	1.81991416888379	no	5.90186783650283	no
WBGene00233063	Bm12802	Bm12802	0	0	0	0	46.3956042604001	2.68083758158466	19.4724587371255	21.9560209991752	0.893612527194887	no	12.1228713210834	no
WBGene00223921	Bm3660	Bma-dip-2	0	13.4999726225364	0	0	14.4168570788885	2.49053264045955	6.51967483506751	11.4788348454975	0.830177546819851	no	6.81837391524167	no
WBGene00223258	Bm2997a	Bm2997a	8	6.3000399033155	0	0	10.0859014740749	1.27325860263021	7.09044495085598	7.82546210941546	0.424419534210071	no	6.19583058042638	no
WBGene00268779	Bm17637	Bm17637	0	0	0	0	38.4159962593444	4.88671075374427	26.1133094256586	21.5097685616677	1.62890358458142	no	8.56241693065045	no
WBGene00233064	Bm12803	Bma-cpl-1.1	1	17.7202927441937	1.02849791004174	0	7.67427590378252	0.129174872979084	0	8.46485621599207	0.385890927673607	no	6.82943803657047	no
WBGene00221266	Bm1005a	Bm1005a	0	0	541.855598288642	0	24.105304523039	4.56463209042931	47.0726762015161	23.7259935748517	182.140076793024	no	0.13501137494223	no
WBGene00221267	Bm1006	Bm1006	0	0	752.089602775128	0	16.0000274563403	0.336644385126276	6.24894915513576	7.41632553715868	250.808749053418	no	0.0334234833729835	no
WBGene00221268	Bm1007	Bm1007	0	4.92369088004023	0	0	30.1988751125514	4.77032401686848	15.9678463398123	17.0301374441346	1.59010800562283	no	6.96115274150471	no
WBGene00227036	Bm6775a	Bma-rsy-1	0	6.83269195150602	11.0968276317387	0	25.7058000227774	5.52363727207432	25.6330789919887	19.3905236554241	5.54015496793766	no	3.11774319651234	no
WBGene00268780	Bm17638	Bm17638	0	0	433.221644961189	1880.16837130051	0	298.93913066346	0	0	870.776382308386	no	0.00114708315147526	no
WBGene00223324	Bm3063	Bm3063	1	25.7948194838967	0	0	6.52422771991084	0.976151493433583	11.3248603713682	14.5479691917253	0.325383831144528	no	11.7309181132072	no
WBGene00227540	Bm7279	Bm7279	2	3.61674857154939	0	0	3.76359685031013	0.682226231804577	1.80911423075359	3.06315321753771	0.227408743934859	no	3.31035055568526	no
WBGene00234321	Bm14060	Bma-rps-19.2	0	66.7932691743656	658.792939610825	0	0	332.394796264682	0	22.2644230581219	330.395911958502	no	0.0702012976582374	no
WBGene00222813	Bm2552	Bm2552	1	0	269.213412829495	0	25.222223304585	4.39184756137014	9.51107623972904	11.5777665147714	91.2017534636218	no	0.136415697557573	no
WBGene00222812	Bm2551	Bma-ttc-1	0	0	0	0	1.02141120860335	0.34385175822443	4.78705181710333	1.93615434190223	0.114617252741477	no	2.63422653353028	no
WBGene00221269	Bm1008	Bm1008	0	0	0	0	0	0	0	0	0	no	1	no
WBGene00234190	Bm13929	Bm13929	0	0	103.716106584471	0	3.92674095503909	0.420608690068138	3.90376675591685	2.61016923698531	34.7122384248463	no	0.101090533559879	no
WBGene00222814	Bm2553	Bma-spcs-1	2	0	1293.01586491292	0	2.50547475895919	0	0	0.835158252986398	431.005288304307	no	0.00424799950988957	no
WBGene00224207	Bm3946	Bm3946	0	0	17.9452529844148	0	13.1988699117505	1.29596769778439	10.3098656810237	7.83624519759139	6.41374022739972	no	1.19187413189018	no
WBGene00227304	Bm7043	Bma-yop-1	2	15.9423132911428	963.58731648804	0	5.10449468863461	9.02158176691146	4.98401141169577	8.67693979715772	324.202966084984	no	0.0297566160409155	no
WBGene00226181	Bm5920	Bma-rbg-2	0	0	0	0	3.00328384221469	34.3391463927004	0.670261993689035	1.22451527863458	11.4463821309001	no	0.178727862863206	no
WBGene00224163	Bm3902	Bm3902	2	4.20458633882853	6.43599987755384	0	17.4567174127344	1.66951585659038	7.43767856822292	9.69966077326195	2.70183857804807	no	2.89036394960899	no
WBGene00225849	Bm5588a	Bma-hsr-9	1	10.9274755285941	0	0	17.5017670060576	1.22428290531283	15.2688343252163	14.566025619956	0.408094301770943	no	11.0546755287475	no
WBGene00227697	Bm7436a	Bma-pmr-1	9	2.59888092305193	0	0	8.11320432938403	0.455209999328181	7.79983297525122	6.17063940922906	0.151736666442727	no	6.22593655143099	no
WBGene00227318	Bm7057	Bma-lsm-6	0	0	613.353123661821	0	0	0	0	0	204.451041220607	no	0.00486733965454199	no
WBGene00227319	Bm7058	Bma-ubc-3	1	0	0	0	2.82455002120099	0.237716818359288	0	0.941516673733664	0.0792389394530961	no	1.79896833106997	no
WBGene00225093	Bm4832a	Bm4832a	0	3.29097908673136	0	0	1.31715399153842	0.0886823469388211	2.46924425950666	2.35912577925881	0.0295607823129404	no	3.26267845178837	no
WBGene00233065	Bm12804	Bm12804	0	9.7650976906209	0.355261590470161	0	5.99272845407216	1.27184853886881	6.9197744512867	7.55920019865992	0.542370043112991	no	5.54938176923142	no
WBGene00225121	Bm4860a	Bm4860a	0	11.4223017317726	0	0	20.6825939755716	4.3373992291514	11.1234810804886	14.4094589292776	1.44579974305047	no	6.3003763791628	no
WBGene00227703	Bm7442	Bma-ptr-23	12	4.11514401624794	0.449136093015283	0	12.5172826996793	1.71881364356403	4.63143131787069	7.08795267793266	0.722649912193106	no	4.69506463308954	no
WBGene00233066	Bm12805a	Bm12805a	5	0	0	0	0	0.195168516946626	0	0	0.065056172315542	no	0.938917613918801	no
WBGene00226427	Bm6166a	Bm6166a	0	30.2465574654771	0	0	24.6155540647868	2.10354028311499	17.1569668179496	24.0063594494045	0.701180094371663	no	14.6994192632149	no
WBGene00225065	Bm4804a	Bm4804a	0	12.2886193258377	0	0	10.7057942724099	0.930074669810493	4.3161193078754	9.10351096870765	0.310024889936831	no	7.71245725659063	no
WBGene00268781	Bm17639	Bm17639	0	0	0	0	0	5.7246211035087	0	0	1.9082070345029	no	0.343854473954579	no
WBGene00233890	Bm13629	Bm13629	0	0	0.736935123587974	0	3.78334375922137	275.151564673711	2.95523527722523	2.24619301214886	91.9628332657663	no	0.0349192564179762	no
WBGene00224650	Bm4389	Bma-marc-6	15	14.2205024693811	0	0	16.8848216013914	3.05524171459764	17.8051855420297	16.3035032042674	1.01841390486588	no	8.57282203741911	no
WBGene00222981	Bm2720	Bma-exoc-7	0	10.3429071586969	0	0	14.0744999293955	0.696778418238587	13.5806202490274	12.6660091123733	0.232259472746196	no	11.0902041450064	no
WBGene00233067	Bm12806	Bm12806	2	0	0	0	2.71006382211681	0.273697861043493	0	0.90335460737227	0.091232620347831	no	1.74422444113298	no
WBGene00269321	Bm18181	Bm18181	0	0	0	0	1.77382178906948	0.796194827719259	1.84741719148734	1.20707966018561	0.26539827590642	no	1.74417786258216	no
WBGene00233068	Bm12807	Bm12807	0	0	0	0	1.40404900655347	0.236332201698091	2.19345394930425	1.19916765195257	0.0787774005660303	no	2.03857408469873	no
WBGene00227322	Bm7061	Bm7061	7	0	0	0	3.01052225638305	0.337824558255553	0	1.00350741879435	0.112608186085184	no	1.80073043129754	no
WBGene00233069	Bm12808	Bm12808	0	0	0	0	0.595424838712611	0.100223042373787	2.79057986842061	1.12866823571107	0.0334076807912624	no	2.05985331372919	no
WBGene00225303	Bm5042	Bma-top-1	1	19.2261298393519	54.8151770239387	0	10.7728679488044	8.80750397376742	7.21274877281295	12.4039155203231	21.2075603325687	no	0.603574427789146	no
WBGene00221272	Bm1011a	Bm1011a	0	7.94398440187178	0	0	8.24551333112136	1.00938218257175	3.51311625988402	6.56753799762572	0.336460727523916	no	5.66237214590378	no
WBGene00226094	Bm5833	Bma-unc-40	1	9.04626683355448	0	108.892427803864	5.33501987160727	0.664520518864723	4.50065844588161	6.29398171701445	36.5189827742429	no	0.194407768486246	no
WBGene00226092	Bm5831a	Bm5831a	1	3.85403721577232	0	0	4.36399033766309	1.04061981205065	4.54505115618895	4.25435956987478	0.346873270683551	no	3.90115364544145	no
WBGene00234069	Bm13808	Bm13808	0	0	0	0	0	0.843452562296687	0	0	0.281150854098896	no	0.780548205389408	no
WBGene00226883	Bm6622	Bma-ccep-290	0	2.3164762106037	1.51263225560937	0	0.556276258223977	0.031211159592679	1.73806804436367	1.53694017106378	0.514614471734018	no	1.67497420525723	no
WBGene00227457	Bm7196	Bm7196	1	0	320.26951975183	0	1.57768097119442	351.864700506167	1.84853086013532	1.14207061044325	224.044740085999	no	0.00951842113539145	no
WBGene00224162	Bm3901	Bm3901	0	0	0	0	6.43862398225502	0.722507630683385	0	2.14620799408501	0.240835876894462	no	2.53555530805514	no
WBGene00224476	Bm4215a	Bma-src-2	0	0	0	0	5.11375615841162	0.86075717173948	3.99444342365971	3.03606652735711	0.286919057246493	no	3.13622407301414	no
WBGene00234155	Bm13894	Bma-rpl-24.2	1	0	448.92707065404	0	6.88722986372542	1.15927164201379	2.68986721151521	3.19236569174688	150.028780765351	no	0.027758720361124	no
WBGene00233070	Bm12809a	Bm12809a	0	0	21.0953151726422	0	2.53880701739324	0.610481186204603	2.833008703924	1.79060524043908	7.23526545294892	no	0.338860387243475	no
WBGene00226913	Bm6652a	Bm6652a	0	0	0	0	0	1.01369578164257	4.70417276964527	1.56805758988176	0.337898593880856	no	1.91947102839279	no
WBGene00225525	Bm5264	Bma-glo-1	0	24.0404877144312	0	0	0	0	0	8.0134959048104	0	no	9.0134959048104	no
WBGene00223861	Bm3600a	Bm3600a	11	0	0	0	5.37279336996828	0	3.73047277509408	3.03442204835412	0	no	4.03442204835412	no
WBGene00233071	Bm12810	Bm12810	0	14.4123330987182	366.266860020724	0	31.1486680612569	2.33022360283881	21.6273454386815	22.3961155328855	122.865694541188	no	0.188882931787912	no
WBGene00226887	Bm6626	Bma-lpd-3.1	2	0.968855936273635	67.1233952925157	0	1.18847263706947	0.338539345336376	1.85667308423881	1.3380005525273	22.4873115459507	no	0.099543131956726	no
WBGene00226881	Bm6620	Bma-msh-6	1	0	0	0	0.223829921775848	0.075350957085248	0	0.0746099739252827	0.0251169856950827	no	1.04828033182636	no
WBGene00225677	Bm5416	Bma-pqn-59	0	11.8265734605026	0	0	2.84002140928735	35.7731627977148	2.21838986646252	5.62832824541748	11.9243875992383	no	0.512854337934599	no
WBGene00225676	Bm5415a	Bm5415a	0	0	198.10764358931	0	2.74361493173567	0.153936829460697	2.8574467981751	1.86702057663692	66.0871934729234	no	0.0427357358121421	no
WBGene00225090	Bm4829	Bma-sol-2	1	0	0	0	0	0	0	0	0	no	1	no
WBGene00225088	Bm4827	Bm4827	0	0	0	0	0	0.0700450337942188	0	0	0.0233483445980729	no	0.977184362762376	no
WBGene00225089	Bm4828a	Bma-hmp-2	0	0	0	0	0.868742006710434	0	0	0.289580668903478	0	no	1.28958066890348	no
WBGene00268782	Bm17640	Bm17640	0	0	0	0	0	0	0	0	0	no	1	no
WBGene00227751	Bm7490a	Bm7490a	1	0	0	0	0.368049490467487	0.185852372695075	0.574979651448927	0.314343047305471	0.0619507908983584	no	1.23766850457694	no
WBGene00227750	Bm7489a	Bma-lars-2	0	3.7319502303119	0	0	1.05643730417747	0.237095384265469	0.550134305907308	1.77950728013223	0.0790317947551563	no	2.57592713545844	no
WBGene00233072	Bm12811a	Bma-hxk-1.1	0	0	21.5182208943877	0	0	0.036206821432424	0.336043902997861	0.11201463433262	7.1848092386067	no	0.135863231740013	no
WBGene00234347	Bm14086	Bm14086	1	39.9487610662029	1491.21818180294	0	298.423008669996	18.400455651223	3.92595159540765	114.099240443869	503.20621248472	no	0.228278108428418	no
WBGene00227230	Bm6969a	Bma-cus-2	0	0	73.2142501622032	0	0	0.0539554620618122	0	0	24.4227352080883	no	0.0393348706114772	no
WBGene00227233	Bm6972	Bm6972	0	0	0	0	0	0	0	0	0	no	1	no
WBGene00227438	Bm7177	Bma-soem-1	1	0	9.03140479348999	0	0	0	0	0	3.01046826449666	no	0.249347441258335	no
WBGene00233939	Bm13678a	Bma-aars-2	0	0	0.49254337402737	0	0.367517883114862	0.123722619473467	1.72244746813444	0.696655117083099	0.205421997833612	no	1.40751962394276	no
WBGene00224208	Bm3947	Bma-tlf-1	0	0	0	0	13.7271039508843	0.951412110996863	7.5688083032057	7.09863741803001	0.317137370332288	no	6.14866573559209	no
WBGene00222889	Bm2628	Bm2628	0	0	0	0	0	0.344774437360989	0	0	0.114924812453663	no	0.896921468452439	no
WBGene00255536	Bm16933	Bma-pamn-1	2	0	0	0	1.30876063991353	0.220293082422967	1.02229558260186	0.777018740838466	0.0734310274743222	no	1.65545684385481	no
WBGene00225807	Bm5546	Bma-chd-7	1	0	129.433072474997	0	0.179368992691212	0.0603834606359499	0.280216447976441	0.153195146889218	43.1644853118775	no	0.0261113684161758	no
WBGene00233073	Bm12812	Bm12812	1	0	0	0	1.66122882095662	0	3.89284373374888	1.85135751823517	0	no	2.85135751823517	no
WBGene00227006	Bm6745a	Bm6745a	2	0	0	0	0.953373825848753	0	0	0.317791275282918	0	no	1.31779127528292	no
WBGene00227005	Bm6744a	Bma-rga-2	1	0	4.05501983715219	0	0.999303512693622	0.134563735719876	0	0.333101170897874	1.39652785762402	no	0.556263582189086	no
WBGene00222886	Bm2625a	Bma-prp-4	1	0	0	0	0.605180742518156	0.203730349349676	2.83630290009135	1.14716121420317	0.0679101164498918	no	2.01061979011968	no
WBGene00227064	Bm6803	Bm6803	0	0	0	0	1.45953086659573	0.122835507001143	0	0.486510288865244	0.0409451690003809	no	1.42803899103806	no
WBGene00227063	Bm6802	Bm6802	0	0	21.9724958191627	0	1.08172127051899	6.37270842415471	0	0.360573756839664	9.44840141443914	no	0.13021836574535	no
WBGene00224070	Bm3809	Bma-pole-1	0	1.8899703508592	0.61882687163419	0	0.302570381144045	0	0.236342960382852	0.809627897462032	0.206275623878064	no	1.50017778826057	no
WBGene00226878	Bm6617	Bm6617	10	0	15.7810511162708	0	0.612464276461274	0	1.91362577764922	0.842030018036833	5.26035037209026	no	0.294237528022221	no
WBGene00223965	Bm3704	Bm3704	0	0	0	0	0	0	0	0	0	no	1	no
WBGene00223967	Bm3706a	Bma-stn-1	0	0	120.363327745201	0	1.10681678573644	16.8602865141361	0.864553743672118	0.657123509802854	45.7412047531124	no	0.0354531621201422	no
WBGene00223968	Bm3707a	Bm3707a	0	0	3194.439610146	0	3.17321560695894	23.145273314571	1.65243574656592	1.60855045117496	1072.52829448686	no	0.00242988514096113	no
WBGene00227862	Bm7601	Bma-lpd-5	0	0	6.10742688580265	0	24.0262707377175	4.04414762984484	4.69183395582325	9.5727015645136	3.3838581718825	no	2.41173440152	no
WBGene00221274	Bm1013	Bm1013	0	0	3139.62398756747	0	0	1.54492112613061	0	0	1047.05630289787	no	0.000954147212544792	no
WBGene00227860	Bm7599a	Bma-pdp-1	0	0	0	0	0	0	1.1810905880869	0.393696862695634	0	no	1.39369686269563	no
WBGene00222783	Bm2522	Bma-obr-4	0	0	0	0	0.441318930369764	0	0.689443706169826	0.37692087884653	0	no	1.37692087884653	no
WBGene00226400	Bm6139	Bm6139	0	14050.3345305459	1049.61694111639	0	13.7537773554877	601.337351332432	0	4688.02943596714	550.318097482939	no	8.50512518521531	no
WBGene00225842	Bm5581	Bm5581	2	0	0	0	0.579088109669668	0	0	0.193029369889889	0	no	1.19302936988989	no
WBGene00233074	Bm12813	Bm12813	0	926.836966732046	470.707635119302	0	0	0	0	308.945655577349	156.902545039767	no	1.9628920832105	no
WBGene00223835	Bm3574a	Bma-blmp-1	0	0	14.0755276164582	0	0.978773584423153	27.8975029281307	0	0.326257861474384	13.9910101815297	no	0.0884702128418577	no
WBGene00224091	Bm3830	Bm3830	11	0	0	0	0	0	0	0	0	no	1	no
WBGene00233075	Bm12814	Bm12814	1	0	0	0	1.46372894195507	0	0	0.487909647318356	0	no	1.48790964731836	no
WBGene00227499	Bm7238a	Bma-ekl-4	0	0	164.784051879852	0	1.75412020657886	0.073814213130905	1.37017364661633	1.0414312843984	54.9526220309944	no	0.0364849976694133	no
WBGene00222215	Bm1954a	Bm1954a	0	0	0	0	3.53759618386514	0	0	1.17919872795505	0	no	2.17919872795505	no
WBGene00223322	Bm3061	Bma-mctp-1	2	0	0	0	0.335335177872119	0	0	0.11177839262404	0	no	1.11177839262404	no
WBGene00234617	Bm14356	Bm14356	0	0	0	0	0	0	0	0	0	no	1	no
WBGene00226930	Bm6669	Bm6669	5	3.63687582012862	0	0	0.343174573608378	194.144123524469	0.536119195461595	1.5053898630662	64.7147078414895	no	0.0381252530119962	no
WBGene00226927	Bm6666	Bma-csk-1	0	0	0	0	0	0	0.986086932556567	0.328695644185522	0	no	1.32869564418552	no
WBGene00233076	Bm12815	Bm12815	1	0	0	0	0	0.172079384361422	1.59710865683715	0.532369552279051	0.0573597947871408	no	1.4492413649864	no
WBGene00226317	Bm6056	Bm6056	4	0	0	0	0	0	0	0	0	no	1	no
WBGene00233077	Bm12816	Bm12816	0	0	0	0	1.26659509385437	0	0	0.422198364618124	0	no	1.42219836461812	no
WBGene00233078	Bm12817a	Bm12817a	0	0	89.8868702121256	0	0.863826454050812	203.125075780653	1.3494995817862	0.737775345279005	97.6706486642596	no	0.0176118771772954	no
WBGene00231432	Bm11171a	Bma-chdp-1	0	0	0	0	3095.31715317173	0.0812174085481639	0	1031.77238439058	0.0270724695160546	no	1005.54967156038	no
WBGene00255612	NA	NA	NA	0	0	0	21.6038106574406	0	0	7.20127021914687	0	no	8.20127021914687	no
WBGene00224811	Bm4550a	Bma-hrpr-1	0	3.67654481862116	71.7413277467358	0	1.73458864542395	0.642332378528321	1.62590064746943	2.34567803717151	24.1278867084214	no	0.133146017251432	no
WBGene00234098	Bm13837	Bma-atp-1	1	0	399.064898505996	0	0	59.9290139075521	0	0	152.997970804516	no	0.00649359205693296	no
WBGene00223271	Bm3010	Bma-rab-8	0	0	17.2215575386087	0	2.12628034325785	0.715799110435629	0	0.708760114419283	5.97911888301476	no	0.244838946443215	no
WBGene00222257	Bm1996	Bma-unc-94	0	0	3.95038417402696	0	1.7503214749213	0	0	0.583440491640434	1.31679472467565	no	0.683461713191751	no
WBGene00222980	Bm2719a	Bma-nab-1	0	0	0	0	0.78299655676614	0.30752276576101	3.26193151704146	1.34830935793587	0.102507588587003	no	2.1299711514417	no
WBGene00222780	Bm2519a	Bma-pde-5	0	0	0	0	0	0.069103230722407	0	0	0.0230344102408023	no	0.977484227304358	no
WBGene00224418	Bm4157a	Bm4157a	1	0	0	0	0	0	0	0	0	no	1	no
WBGene00222472	Bm2211a	Bma-sol-1	0	0	0	0	0.442427343448359	0.0744702127066434	0	0.147475781149453	0.0248234042355478	no	1.11968147527368	no
WBGene00226015	Bm5754	Bma-larp-5	0	0	0	0	0	0	0	0	0	no	1	no
WBGene00226530	Bm6269a	Bma-pop-1	1	0	78.717363196031	0	0	0.0321455942765062	0	0	26.2498362634358	no	0.0366974682098113	no
WBGene00234207	Bm13946	Bma-gpi-1	2	0	0	0	0	1.28076096813392	0.475481577793092	0.158493859264364	0.426920322711308	no	0.811884056050934	no
WBGene00227435	Bm7174	Bma-ubc-14	0	0	63.3669271199422	0	0	0.29157172539303	0	0	21.2194996151118	no	0.0450055139549537	no
WBGene00233083	Bm12822	Bm12822	0	0	210.513362069744	0	1.7302636416235	2.184309525706	0	0.576754547207834	70.8992238651498	no	0.0219300635312157	no
WBGene00223956	Bm3695a	Bma-sqv-4	1	0	0	0	1.73135377748642	0.485707939729821	1.80318719320324	1.17818032356322	0.161902646576607	no	1.8746668061915	no
WBGene00223567	Bm3306	Bma-unc-122	1	5.96507114281812	0	0	0.477482053729922	0.16074137655112	2.23781696704455	2.89345672119753	0.0535804588503734	no	3.69545267140387	no
WBGene00228788	Bm8527	Bma-ace-2	1	0	14.8029783374998	0	0.43785925997872	0	0.684038889352815	0.373966049777178	4.93432611249992	no	0.231528571859758	no
WBGene00226315	Bm6054	Bma-pars-2	1	0	0	0	0.800141135460763	0	1.25000817306612	0.683383102842293	0	no	1.68338310284229	no
WBGene00223166	Bm2905	Bm2905	0	0	0	0	0	0	0	0	0	no	1	no
WBGene00225441	Bm5180a	Bm5180a	0	0	0	0	1.04757727799117	0	0	0.349192425997058	0	no	1.34919242599706	no
WBGene00233085	Bm12824	Bma-cids-2.1	2	26.0955616642132	0	0	0	0	0	8.69852055473774	0	no	9.69852055473774	no
WBGene00233086	Bm12825	Bma-timm-23.3	2	0	0	0	2.26061592269369	0.190255587842836	1.76580621486438	1.34214071251935	0.0634185292809454	no	2.20246370363985	no
WBGene00223971	Bm3710	Bma-taf-5	2	13.0398199311297	4.97101490177458	0	4.03105188455365	0.185049361963315	1.14499068373027	6.07195416647122	1.71868808791263	no	2.60123778005772	no
WBGene00223973	Bm3712a	Bm3712a	3	0	1.51407881774275	0	0	0.190161727168025	0	0	0.568080181636923	no	0.637722491305322	no
WBGene00226624	Bm6363a	Bma-mrpl-38	0	0	0	0	0.781038175200786	0.131465832527144	0	0.260346058400262	0.0438219441757147	no	1.2074339550272	no
WBGene00227490	Bm7229	Bm7229	1	0	0	0	0	0.136857028570774	1.90530271151175	0.635100903837249	0.0456190095235915	no	1.56376355914019	no
WBGene00223067	Bm2806	Bm2806	2	0	0	0	0	0	0	0	0	no	1	no
WBGene00223944	Bm3683a	Bm3683a	0	0	1.84105444724928	0	0	0.462456893784746	0	0	0.767837113678008	no	0.565662974412551	no
WBGene00222606	Bm2345a	Bm2345a	4	0	1227.00488844099	0	0	0	0	0	409.001629480329	no	0.0024390146967647	no
WBGene00225270	Bm5009	Bma-slc-25A10	4	0	56.8081593461846	0	1.00218990358368	2.19297666197139	184.747378632471	61.9165228453516	19.667045336052	no	3.04429209992581	no
WBGene00225358	Bm5097	Bm5097	0	0	0	0	0	0.0926804089852335	0	0	0.0308934696617445	no	0.970032335473149	no
WBGene00221276	Bm1015	Bm1015	0	0	0	0	0	0	0	0	0	no	1	no
WBGene00221277	Bm1016a	Bm1016a	0	0	3.47569395647174	0	0	0.43653207357824	0	0	1.30407534334999	no	0.434013585053194	no
WBGene00222776	Bm2515a	Bma-ric-19	0	0	14.3819555916534	0	0	0	0.831015886484373	0.277005295494791	4.7939851972178	no	0.22040189127649	no
WBGene00222774	Bm2513a	Bm2513a	0	0	0	0	0	0	0	0	0	no	1	no
WBGene00222773	Bm2512	Bma-tppp-1	0	0	204.995998697113	0	1.6229652230253	0.409770894014443	1.26772621945968	0.963563814161662	68.4685898637091	no	0.0282654911811798	no
WBGene00234304	Bm14043	Bma-rpl-13	0	0	1278.69434713219	0	0	31.4201426117858	0	0	436.704829914659	no	0.00228464465469795	no
WBGene00233089	Bm12828a	Bm12828a	0	0	64.1017297832274	0	0.303996273687602	666.888594278059	0	0.101332091229201	243.663441353762	no	0.00450141666092553	no
WBGene00234620	Bm14359	Bm14359	1	0	0	0	1.05287536997182	0	0	0.350958456657273	0	no	1.35095845665727	no
WBGene00226508	Bm6247	Bm6247	0	122.320166026111	12.0514489191373	0	0	0.187570715800285	0	40.7733886753703	4.07967321164586	no	8.22363702050732	no
WBGene00223652	Bm3391a	Bma-dys-1	0	2.61284020005801	19.7224919571107	0	1.35787756176724	0.085710201080328	1.50260401858824	1.82444059347116	6.60273405273033	no	0.371503274201316	no
WBGene00268784	Bm17642	Bm17642	0	0	2.53325444784527	0	0	0.159082881126532	0	0	0.897445776323934	no	0.527024283106196	no
WBGene00227323	Bm7062	Bm7062	12	0	0	0	0.52935828240608	0.0891025938441022	0	0.176452760802027	0.0297008646147007	no	1.14251895985563	no
WBGene00227314	Bm7053	Bma-ddx-27	2	0	73.2841851391687	0	0	0	0	0	24.4280617130562	no	0.0393266309986397	no
WBGene00233090	Bm12829a	Bm12829a	0	0	0	0	1.01755340132802	220.090335456973	0	0.339184467109339	73.3634451523244	no	0.0180086393841246	no
WBGene00233091	Bm12830	Bm12830	3	0	22.9175646510915	0	0.367576874749391	191.182129501769	0	0.122525624916464	71.3665647176202	no	0.015511661072992	no
WBGene00233092	Bm12831a	Bma-ptr-12	12	0	26.2546182988526	0	0.256009382860671	44.9880341075738	0	0.0853364609535571	23.7475508021421	no	0.0438563181314739	no
WBGene00268785	Bm17643	Bm17643	1	0	0	0	2.76904949176385	0.466091681946295	0	0.923016497254617	0.155363893982098	no	1.66442495500419	no
WBGene00221278	Bm1017	Bm1017	1	0	0	0	0	0	0	0	0	no	1	no
WBGene00222043	Bm1782a	Bma-scpl-1	0	0	0	0	0	198.165652460691	0	0	66.0552174868969	no	0.0149130826426058	no
WBGene00233095	Bm12834	Bm12834	1	0	10648.2529655896	0	2.41561595958724	578.999933608323	0	0.805205319862413	3742.41763306597	no	0.000482234550566002	no
WBGene00223269	Bm3008a	Bm3008a	0	0	0	0	0.215956613512703	0.0363502283072035	1.01212468633965	0.409360433284119	0.0121167427690678	no	1.39248801420696	no
WBGene00234621	Bm14360	Bm14360	1	0	0	0	0	0	0	0	0	no	1	no
WBGene00224752	Bm4491	Bma-pept-3	13	5.86063084948522	0	0	0	0	0	1.95354361649507	0	no	2.95354361649507	no
WBGene00221883	Bm1622	Bm1622	0	0	19.0623463575438	0	0	0	0	0	6.35411545251459	no	0.13597828405836	no
WBGene00224503	Bm4242	Bma-abts-1	13	0	0	0	0	0.0604402698501899	0.280480077719735	0.0934933592399118	0.02014675661673	no	1.07189808931651	no
WBGene00227052	Bm6791	Bma-ubc-16	0	0	267.5164163355	0	0	0	2.78623317080625	0.92874439026875	89.1721387785002	no	0.0213895823742912	no
WBGene00226091	Bm5830	Bma-nepr-1	2	0	0	0	0	0	0	0	0	no	1	no
WBGene00226089	Bm5828a	Bm5828a	7	0	0	0	0	0.153324511125531	0	0	0.0511081703751771	no	0.951376868893584	no
WBGene00227250	Bm6989	Bma-fln-1.2	0	0	138.031657893412	0	0.188322691586242	0.0633976679226293	0	0.0627742305287474	46.0316851871117	no	0.0225969838482416	no
WBGene00223834	Bm3573	Bm3573	2	0	0	0	0	0	0	0	0	no	1	no
WBGene00223833	Bm3572	Bma-cup-2	4	0	0.953117317877188	0	0	0.598536989083208	1.11103210910411	0.370344036368036	0.517218102320132	no	0.903195153203421	no
WBGene00226522	Bm6261a	Bm6261a	1	0	25.6664271302594	0	0.256870883868615	0.086473992365583	0.40129258455583	0.219387822808148	8.58430037420833	no	0.127227630103243	no
WBGene00255613	NA	NA	NA	0	0	0	0	0	0	0	0	no	1	no
WBGene00221885	Bm1624a	Bm1624a	1	0	0	0	0	0	0.630511700972017	0.210170566990672	0	no	1.21017056699067	no
WBGene00233096	Bm12835	Bm12835	0	11.5207152656001	40.0923174201245	0	1.8846217839591	0.285500813819955	1.32489961821402	4.91007888925774	13.4592727446481	no	0.408739705905696	no
WBGene00227900	Bm7639a	Bma-vab-10	0	0	51.6339989184401	0	1.02996103881454	0.317835838484704	0.446955772134033	0.492305603649524	17.3172782523083	no	0.0814698331866782	no
WBGene00233099	Bm12838	Bm12838	0	10.65096098323	0	0	0	0	0	3.55032032774332	0	no	4.55032032774332	no
WBGene00227305	Bm7044	Bma-lin-17	9	0	1.48035687254686	0	0.218636999206483	0	0.341562286740044	0.186733095315509	0.493452290848954	no	0.794624041616294	no
WBGene00224013	Bm3752a	Bm3752a	1	0	2.81043575035306	0	2.0612096576856	0	1.61004653074493	1.22375206281018	0.936811916784352	no	1.14815075410225	no
WBGene00233955	Bm13694a	Bma-wdr-12	0	0	7.93730918180454	0	2.95484378024349	0.124341232570834	1.15403980365007	1.36962786129785	2.68721680479179	no	0.642660300912699	no
WBGene00224698	Bm4437	Bma-cir-1	0	0	1.10998724445156	0	0	0	0	0	0.369995748150521	no	0.729929272663794	no
WBGene00226207	Bm5946	Bma-tsp-7	4	0	0	0	0	0.139506992750484	0	0	0.0465023309168279	no	0.95556404458642	no
WBGene00226206	Bm5945	Bma-mom-5	7	0	0	0	3.22535764744888	0.4653414337661	1.43964723996589	1.55500162913825	0.155113811255367	no	2.21190466622635	no
WBGene00222748	Bm2487	Bma-rege-1	0	0	1.42041241757076	0	2.11971977447273	0.0594658779650704	2.75958299237521	1.62643425561598	0.493292765178608	no	1.75882071946009	no
WBGene00227513	Bm7252a	Bma-ero-1	1	0	3.44062529547595	0	0	0.21606380099192	1.0026691119157	0.334223037305234	1.21889636548929	no	0.601300294171704	no
WBGene00221282	Bm1021	Bm1021	0	0	0	0	0	0	0	0	0	no	1	no
WBGene00233102	Bm12841a	Bm12841a	1	0	0	0	3.57440779868164	0.401100750228498	1.86135452201625	1.81192077356596	0.133700250076166	no	2.48030356646481	no
WBGene00233103	Bm12842a	Bm12842a	1	0	0	0	0.452078556843096	0.0760947233184456	0	0.150692852281032	0.0253649077728152	no	1.12222765140309	no
WBGene00233104	Bm12843	Bma-ced-1	2	0	0	0	1.09937778669645	0.601410426380775	0	0.36645926223215	0.200470142126925	no	1.13827009459072	no
WBGene00234970	Bm14785	Bma-ctn-1	0	0	0	0	0.599948632352293	0.151476743896877	0.46863025822835	0.356192963526881	0.0504922479656256	no	1.29100711228786	no
WBGene00233105	Bm12844	Bm12844	2	0	0	0	2.67211660407083	0.44977575375681	2.08723651768683	1.58645104058589	0.14992525125227	no	2.24923405914362	no
WBGene00223306	Bm3045a	Bma-wdr-23.2	0	0	0	0	0.83485378406442	0.210786267391316	0.652118737024285	0.495657507029568	0.0702620891304386	no	1.39746845396042	no
WBGene00234039	Bm13778	Bm13778	0	0	1386.72795867786	0	0	235.567411986935	0	0	540.765123554931	no	0.0018458183380987	no
WBGene00235023	Bm14688a	Bm14688a	0	0	0	0	2.5275981563893	0.319087600140386	0.987175328729367	1.17159116170622	0.106362533380129	no	1.9628205910694	no
WBGene00222100	Bm1839	Bm1839	1	0	0	0	5.73696182803016	0.482828168229127	2.98749343742399	2.90815175515138	0.160942722743042	no	3.36636052631202	no
WBGene00226551	Bm6290a	Bm6290a	0	0	0	0	0.966654254828495	0.325418168821938	1.51014073082112	0.82559832854987	0.108472722940646	no	1.64694925799056	no
WBGene00233106	Bm12845a	Bm12845a	0	0	0	0	0	0.293570313000446	1.36234706447648	0.454115688158825	0.0978567710001488	no	1.32450400322633	no
WBGene00231434	Bm11173	Bm11173	0	0	61.476704136909	0	3.09459990498473	0	0	1.03153330166158	20.492234712303	no	0.0945240608459691	no
WBGene00223177	Bm2916a	Bm2916a	0	0	263.936178400614	0	0	0	0	0	87.9787261335379	no	0.011238641453455	no
WBGene00226356	Bm6095a	Bm6095a	6	2070.76748108671	186.616338168079	0	0.694150933521887	77.114932355237	0	690.487210673412	87.9104235077721	no	7.777346945299	no
WBGene00233108	Bm12847	Bm12847	0	0	0	0	0	0.213077844648749	1.97762487082102	0.659208290273673	0.0710259482162495	no	1.54917655640091	no
WBGene00221284	Bm1023	Bma-mpc-2.1	2	15.6170349727917	810.696909357393	0	0	0.248042355836284	0	5.2056783242639	270.31498390441	no	0.0228725971376881	no
WBGene00224577	Bm4316a	Bma-mpc-2.2	3	0	0	0	0	0	0	0	0	no	1	no
WBGene00224578	Bm4317a	Bma-unc-108	0	0	4.78444214564838	0	0	65.0656391625029	0	0	23.2833604360504	no	0.0411804619312666	no
WBGene00233109	Bm12848a	Bm12848a	1	0	0	0	0	0	0	0	0	no	1	no
WBGene00222986	Bm2725	Bm2725	0	0	0	0	0	0	0	0	0	no	1	no
WBGene00227693	Bm7432a	Bma-gbb-2	7	3.04464588479718	0	0	1.72375154662304	7.88227635403871	3.14172170859448	2.6367063800049	2.62742545134624	no	1.00255854428524	no
WBGene00223091	Bm2830a	Bma-smg-1	0	0	0	0	0.680434981336712	0.229064222831428	1.06299907630819	0.581144685881635	0.0763547409438095	no	1.46898102060218	no
WBGene00233110	Bm12849a	Bm12849a	1	0	0	0	0.601524541552063	4.15123999468165	0.939722456347577	0.51374899929988	1.38374666489388	no	0.635029309780814	no
WBGene00221988	Bm1727a	Bma-let-363	0	4.03210295805113	0	0	1.43626442043926	0.362632142238674	1.49585465585751	2.32140734478264	0.120877380746225	no	2.9632209569359	no
WBGene00221285	Bm1024	Bm1024	0	0	0	0	2.63926691858091	0	0	0.87975563952697	0	no	1.87975563952697	no
WBGene00233111	Bm12850	Bm12850	1	0	0	0	13.1393668096893	1.42177065111733	19.0605754455319	10.7333140850737	0.473923550372442	no	7.96059882624772	no
WBGene00269322	Bm18182	Bm18182	1	0	0	0	7.35153749498781	1.23742478641922	0	2.45051249832927	0.412474928806406	no	2.4428840667955	no
WBGene00226119	Bm5858a	Bm5858a	0	9.24345111500992	0	0	7.39904339156286	1.36996317630548	3.46771249562057	6.70340233406445	0.456654392101825	no	5.28842145112343	no
WBGene00233112	Bm12851a	Bm12851a	0	0	7.83640975720123	0	1.1653964018772	0.196161740951443	0	0.388465467292401	2.67752383271756	no	0.377554444362737	no
WBGene00233113	Bm12852a	Bm12852a	1	0	0.952530237535768	0	18.1635455069879	3.76285853295508	21.8274764570789	13.3303406546889	1.57179625683028	no	5.57211350495974	no
WBGene00233114	Bm12853	Bm12853	0	0	309.472786045381	0	8.48149603588409	1.42762155914662	13.2500866345008	7.24386089012831	103.633469201509	no	0.0787879915770718	no
WBGene00233968	Bm13707	Bma-cct-8	1	0	40.4015504166855	0	3.87292280933098	74.0369576397248	1.72868972762272	1.86720417898457	38.1461693521368	no	0.073243544041125	no
WBGene00232764	Bm12503	Bma-ahcy-1	1	9.05618271635191	107.880827887547	0	0	0.488075746716792	2.26497207427365	3.77371826354185	36.122967878088	no	0.128592042511761	no
WBGene00227300	Bm7039	Bma-nxt-1	0	0	773.071319481075	0	2.10285025683077	0.707911516932206	0	0.700950085610255	257.926410332669	no	0.00656924136639778	no
WBGene00233115	Bm12854	Bm12854	2	0	0	0	0	0.532645537958894	3.29573780867363	1.09857926955788	0.177548512652965	no	1.78215950086835	no
WBGene00227020	Bm6759	Bm6759	0	45.40127665885	0	0	17.0406703411294	3.41991770179083	21.5020009208986	27.981315973626	1.13997256726361	no	13.5428446219217	no
WBGene00223791	Bm3530	Bm3530	0	5.19934646496303	0.301773624735943	0	15.9872447402063	3.75224427492517	13.0155718268106	11.40072101066	1.35133929988704	no	5.27389688559865	no
WBGene00221286	Bm1025	Bm1025	4	6.95981426662411	196.193445599745	0	3.28363052722785	0.442165553162703	2.05192049975063	4.09845509786753	65.545203717636	no	0.0766164173078687	no
WBGene00223580	Bm3319	Bma-abt-2	13	4.38779580800775	0	0	8.20556521273964	83.9229063059706	6.71472368976239	6.43602823683659	27.9743021019902	no	0.256642186260832	no
WBGene00234044	Bm13783	Bma-rps-15	1	0	1846.75445721208	0	11.7436098958395	507.448867606114	13.104481286869	8.28269706090282	784.734441606064	no	0.0118140386488961	no
WBGene00234264	Bm14003a	Bma-vha-16	0	0	4.6039429646745	0	31.0646360264466	5.7972128780445	40.0902060955407	23.7182807073291	3.467051947573	no	5.53346614219672	no
WBGene00222747	Bm2486b	Bma-kin-32	1	3.39282431814879	0	0	7.04321074418447	1.34718936449597	5.00143071622428	5.14582192618584	0.449063121498656	no	4.24123824214758	no
WBGene00223744	Bm3483	Bm3483	0	0	0	0	1.68413600271278	0.566953956197222	3.9465233219142	1.87688644154233	0.188984652065741	no	2.4196161292276	no
WBGene00233117	Bm12856	Bm12856	0	4.33760006214804	0	0	5.32083129328921	0.482252859121913	3.19707184210476	4.285167732514	0.160750953040638	no	4.55323143924136	no
WBGene00227321	Bm7060	Bma-mab-20	1	12.2571519584316	0	0	13.2707691799299	2.94856469448223	14.9270795187005	13.4850002190207	0.982854898160743	no	7.30512365400851	no
WBGene00233118	Bm12857	Bm12857	0	647.021727628463	2.67901683281188	0	199.429771654572	9.59097109233633	170.358256729296	338.936585337444	4.0899959750494	no	66.7852365706722	no
WBGene00226213	Bm5952a	Bm5952a	1	2.1542531024816	52.4439798355156	0	1.03464032967863	0.29025438326023	1.34695910817591	1.51195084677872	17.5780780729253	no	0.135210479626496	no
WBGene00233119	Bm12858	Bma-hrpf-1	0	0	0	0	9.95924514134799	2.095448877247	4.86208669654149	4.94044394596316	0.698482959082334	no	3.49749988023	no
WBGene00234752	Bm14491	Bma-ocrl-1.2	0	13.9156378140587	0	0	7.87845388654371	0.773567874652266	3.07699832968626	8.29036334342954	0.257855958217422	no	7.38587219207153	no
WBGene00222504	Bm2243	Bma-ocrl-1.1	0	8.56649218062771	0	0	14.9541379100745	1.49665938251516	18.9420581961625	14.1542294289549	0.498886460838387	no	10.1103251146044	no
WBGene00222505	Bm2244	Bm2244	0	0	1.13248625961791	0	0	0.711176791456801	0	0	0.614554350358238	no	0.619365956790565	no
WBGene00225109	Bm4848	Bma-cri-1	0	0	0	0	0	0	0	0	0	no	1	no
WBGene00233121	Bm12860a	Bma-lim-7	0	0	0	0	3.17101859638408	0.378074253201186	1.44488020650857	1.53863293429755	0.126024751067062	no	2.25450899892906	no
WBGene00227388	Bm7127	Bma-eif-3.I	0	18.8203740579436	0	0	11.5432536199896	0.896761118967629	4.16152391389906	11.5083838639441	0.29892037298921	no	9.62983114596817	no
WBGene00222321	Bm2060a	Bma-cux-7	1	12.044105383483	355.6153184834	0	9.66006620464217	0.573882611865389	22.1930731471168	14.6324149117473	118.729733698422	no	0.130564183422663	no
WBGene00227293	Bm7032	Bm7032	0	36.455535139797	3.9108477394897	0	19.6973896468923	3.80668762346517	18.2352259512723	24.7960502459872	2.57251178765162	no	7.22070402542859	no
WBGene00233124	Bm12863	Bma-hrpk-1.1	0	0	0	0	0.546540317348139	0.367978826701276	1.70764839680918	0.751396238052439	0.122659608900425	no	1.56004208592471	no
WBGene00225363	Bm5102	Bm5102	2	0	645.466498678858	0	2.60227719282807	53.1099554460935	9.14707685279461	3.91645134854089	232.858818041651	no	0.021023159997607	no
WBGene00221889	Bm1628	Bm1628	0	0	0	0	6.89760219785754	0	0	2.29920073261918	0	no	3.29920073261918	no
WBGene00233899	Bm13638	Bm13638	0	0	0	0	11.4500196484435	0	0	3.81667321614784	0	no	4.81667321614784	no
WBGene00227447	Bm7186	Bm7186	4	5.55609473034296	0	0	11.5498779683785	0.891044663374056	7.14226588578221	8.08274619483454	0.297014887791352	no	7.00280797107987	no
WBGene00222887	Bm2626	Bma-dhfr-1	0	0	0	0	0	0	0	0	0	no	1	no
WBGene00233126	Bm12865a	Bm12865a	0	37.6197901761782	0.52435294098147	0	20.7364100928586	5.4660856211303	22.6154733433561	26.9905578707976	1.99681285403726	no	9.34010872019893	no
WBGene00233127	Bm12866	Bm12866	0	0	17.5008692229133	0	5.67471124725743	1.04201258203087	3.22372010931762	2.96614378552502	6.18096060164807	no	0.55231382060706	no
WBGene00233128	Bm12867	Bm12867	0	0	0	0	3.34307143020249	0.37514143160057	6.96354918017562	3.43554020345937	0.125047143866857	no	3.94253718845429	no
WBGene00233129	Bm12868	Bm12868	1	0	0	0	12.7576820595471	0	9.96524621536275	7.57430942496995	0	no	8.57430942496995	no
WBGene00255609	Bm16950	Bm16950	0	0	0	0	6.77515955529202	0	10.5843887317018	5.78651609566462	0	no	6.78651609566462	no
WBGene00255614	NA	NA	NA	0	0	0	0	0	0	0	0	no	1	no
WBGene00233938	Bm13677	Bma-pbs-7	0	0	307.398808217852	0	2.65970258965006	0.671529304825063	8.31015886484373	3.65662048483126	102.690112507559	no	0.0449090117873273	no
WBGene00224119	Bm3858	Bm3858	0	33.0848802659202	0.780925639583854	0	17.480946028158	2.74626437332021	28.2196501605018	26.26182548486	1.17573000430135	no	12.5299671516981	no
WBGene00233130	Bm12869	Bm12869	2	20.598891136998	0	0	6.2446542687265	0.900953223925795	5.57463715047172	10.8060608520654	0.300317741308598	no	9.07936612491665	no
WBGene00233131	Bm12870	Bm12870	0	88.6514749110645	203.197085385866	0	15.5430130974346	2.96506016130451	22.6630441078793	42.2858440387928	68.7207151823902	no	0.620846242405238	no
WBGene00226333	Bm6072	Bma-cah-6	0	13.8272021270931	0	0	12.1749846431009	0.74520603377397	5.18732246203271	10.3965030774089	0.24840201125799	no	9.12887273060773	no
WBGene00221890	Bm1629a	Bm1629a	0	1.19739847778361	0	0	0.677917089901925	0.114108295136053	0.882554615974745	0.919290061220095	0.0380360983786842	no	1.84896273281618	no
WBGene00221287	Bm1026	Bm1026	1	0	47.815632992027	0	19.8746724852443	1.85852372695075	17.2493895434678	12.374687342904	16.5580522396593	no	0.761740947136149	no
WBGene00221288	Bm1027	Bm1027	0	0	21.632896915602	0	0.532806870565078	0.089683066768168	0	0.177602290188359	7.24085999412338	no	0.142897985286501	no
WBGene00225594	Bm5333a	Bma-alx-1	0	39.6149695995713	30.1639131622176	0	15.9466398701665	18.5655007343541	21.7983436000638	25.7866510232672	16.2431379655239	no	1.5534673025771	no
WBGene00227430	Bm7169a	Bm7169a	1	31.8539891174208	15.4206972340174	409.900777957824	29.1195799179919	4.25920244165289	39.530645207903	33.5014047477719	143.193559211165	no	0.239271469103875	no
WBGene00224059	Bm3798a	Bma-dlk-1	1	5.73258386260559	0.338507601760868	0	4.46878477172557	0.417885755604495	3.10279565595423	4.43472143009513	0.252131119121788	no	4.34037725530446	no
WBGene00233133	Bm12872	Bm12872	0	0	207.381270960276	0	0	0.416711157804958	0	0	69.2659940393603	no	0.0142316352834892	no
WBGene00269323	Bm18183	Bma-timm-23.2	0	0	0	0	6.60895795003955	0.556216191875305	5.16237141603929	3.92377645535961	0.185405397291768	no	4.15366461685487	no
WBGene00222804	Bm2543	Bm2543	0	0	0	0	11.1280996236174	25.0193032007333	8.69235117639937	6.60681693333894	8.33976773357776	no	0.814454614967712	no
WBGene00225600	Bm5339	Bma-apb-3	1	102.126037336048	175.591894648008	372.55687637917	43.8068661824716	309.324831940203	55.8898919733608	67.2742651639602	285.82453432246	no	0.23803495515207	no
WBGene00227002	Bm6741	Bma-pigl-1	5	670.479101853438	2.71596262262349	2068.18520843056	253.319018770874	26.2657099244762	332.424739900972	418.740953508428	699.055626992553	yes	0.599582286498632	no
WBGene00223938	Bm3677	Bm3677	2	0	0	0	0	1.15234027195691	1.33689214922094	0.445630716406979	0.384113423985636	no	1.0444452682528	no
WBGene00224159	Bm3898a	Bma-mus-101	0	4.38224491652551	0	0	6.82287194652647	0.800427038849809	6.13695778575201	5.78069154960133	0.266809012949936	no	5.3525760239198	no
WBGene00223342	Bm3081a	Bm3081a	0	0	199.349724090874	0	2.35961249839125	0.794348935537529	5.52940245952894	2.62967165264006	66.7146910088037	no	0.0536024250951417	no
WBGene00234286	Bm14025	Bma-eif-6	0	0	177.185489242681	0	0	0.77060739897958	5.72174872661371	1.9072495755379	59.3186988805536	no	0.0481981479954499	no
WBGene00228600	Bm8339	Bma-pola-1	0	0	0	0	9.24046209463754	0.68619360485922	2.97207022777196	4.07084410746984	0.22873120161974	no	4.12689455658434	no
WBGene00226865	Bm6604a	Bm6604a	0	0	0	0	1.2974526513817	0.436779400532109	0	0.432484217127234	0.145593133510703	no	1.25043017038462	no
WBGene00223024	Bm2763a	Bma-ubr-4	0	4.74629173719652	0.283226076371774	71.8915124131454	12.1164229084058	1.24501880158135	11.1151058977125	9.32594018110495	24.4732524303662	no	0.405364026809376	no
WBGene00223215	Bm2954	Bma-gly-2	0	0	0.700693553325239	0	1.04566389483502	0.352016274858069	3.26714464960295	1.43760284814599	0.350903276061103	no	1.80442441094186	no
WBGene00226225	Bm5964	Bma-sec-5	0	56.632878575404	3.17803127234432	0	46.5304296413085	3.91604524904801	52.908332047486	52.0238800880662	2.36469217379744	no	15.7589096860004	no
WBGene00226962	Bm6701	Bm6701	0	0	0	0	9.01576350271143	1.51755047625821	14.0847377610836	7.70016708793167	0.505850158752738	no	5.77757822540446	no
WBGene00269274	Bm18134	Bma-otub-2	0	0	0	0	18.4813229835479	1.22547118430047	11.3738821440689	9.95173504253894	0.408490394766823	no	7.77551276404125	no
WBGene00233900	Bm13639	Bm13639	0	0	0	0	0	0	0	0	0	no	1	no
WBGene00221290	Bm1029a	Bm1029a	1	21.705979666886	0	0	27.7997442147339	3.21702278502689	16.2861459392195	21.9306232736131	1.0723409283423	no	11.0650824678523	no
WBGene00233134	Bm12873a	Bm12873a	0	0	2.73370347110856	0	6.11936917078335	1.14447096487407	5.31105016525419	3.81013977867918	1.29272481199421	no	2.09800136218499	no
WBGene00226669	Bm6408a	Bm6408a	1	0	0	0	5.46458804996559	0.747345514184134	5.86916589179232	3.77791798058597	0.249115171394711	no	3.82504198972392	no
WBGene00226750	Bm6489a	Bma-mcm-4	0	3.86878245619612	0	0	2.92045774549811	0.430129881521936	6.27335522149968	4.35419847439797	0.143376627173979	no	4.68279510630863	no
WBGene00223446	Bm3185a	Bma-calu-2	0	0	1285.73351220547	0	0.695204593105253	42.3605741320553	0	0.231734864368418	442.698028779177	no	0.00277606566735828	no
WBGene00227444	Bm7183	Bm7183	1	101.88658698789	1.19837476125129	0	52.7568261818171	5.04210738089853	67.7508334552083	74.1314155416384	2.08016071404994	no	24.3920439602166	no
WBGene00222693	Bm2432a	Bm2432a	3	189.624840887548	3.6506084211125	1377.97717306989	64.8114319723218	7.27278907489785	84.3755516819629	112.937274847278	462.9668568553	no	0.245572012663853	no
WBGene00227446	Bm7185	Bma-ints-3	0	5.70294262665217	0.36059661186283	0	4.03596039775944	0.452893691657368	5.46443474175748	5.06777925538969	0.271163434506733	no	4.77340607090721	no
WBGene00233135	Bm12874a	Bm12874a	2	0	45.8448898257373	0	4.32955949475758	0.448467505491083	4.68262223994139	3.00406057823299	15.4311191104094	no	0.243687636327603	no
WBGene00235394	NA	NA	NA	0	0	0	0	0	0	0	0	no	1	no
WBGene00226398	Bm6137a	Bma-unc-37	0	3.49139384927455	0	0	5.58946529091702	0.940829438539385	3.92942525284806	4.33676146434655	0.313609812846462	no	4.06266869519063	no
WBGene00227065	Bm6804	Bma-sec-11	2	125.84578305621	1.57935969582309	0	26.64142153912	389.357242527194	39.8105789625366	64.0992611859554	130.312200741006	no	0.495759425389223	no
WBGene00227066	Bm6805	Bma-rpb-7	0	0	79.7741069480658	0	9.59307451096405	10.3803721984628	2.14094757110426	3.91134069402277	30.0514930488429	no	0.158167618101243	no
WBGene00234163	Bm13902	Bma-rps-22	1	25.8666195307013	2070.1168570476	0	95.2442864065826	79.8099828228167	164.967172655585	95.3593595309562	716.642279956806	no	0.134272132819092	no
WBGene00227863	Bm7602	Bm7602	2	7.37207543976862	129.70697887362	0	0	0.351267759085285	0	2.45735847992287	43.3527488775685	no	0.0779513912309376	no
WBGene00232196	Bm11935a	Bma-cpd-1	2	4.03846431408183	0	0	7.11181344623821	0.380887174871132	6.56518973561518	5.90515583197841	0.126962391623711	no	6.1272282760293	no
WBGene00226208	Bm5947a	Bm5947a	0	7.75928429643496	398.947274489361	0	4.96881785666114	0.522725550541885	6.79215181426812	6.50675132245474	133.156666679968	no	0.0559551120956381	no
WBGene00221291	Bm1030a	Bm1030a	1	81.9894336071564	11525.0865227732	0	28.3671657956934	4318.16937275388	28.2011979045119	46.1859324357872	5281.08529850902	no	0.00893320152347907	no
WBGene00227060	Bm6799	Bma-mek-2.2	0	0	0	0	3.39427459934096	0.380887174871132	1.76755108266562	1.72060856066886	0.126962391623711	no	2.41410767643191	no
WBGene00224715	Bm4454a	Bma-gex-2	0	10.1511525338211	23.7310831683289	0	14.0679834421268	1.40597016671571	14.4227282045728	12.8806213935069	8.37901777834819	no	1.47996535687893	no
WBGene00227516	Bm7255a	Bma-rbm-12	1	7.28600056053882	0.397605261510537	0	2.62447922669022	0.638093935133658	2.73336818386494	4.21461599036466	0.345233065548065	no	3.8763662029376	no
WBGene00234754	Bm14493a	Bm14493a	0	0	0	0	0	0	0	0	0	no	1	no
WBGene00227222	Bm6961	Bma-dnj-29	4	4.45337503128202	401.492046693227	0	0	8.88041057028312	0.55689965618232	1.67009156248811	136.790819087837	no	0.0193778626193232	no
WBGene00227832	Bm7571	Bma-mel-26	0	0	0	0	2.09899535260193	0.35330689364765	1.6395615908869	1.24618564782961	0.117768964549217	no	2.00952586721306	no
WBGene00227831	Bm7570	Bma-gld-4	1	9.78067733366007	0	0	5.4803512847251	0.395341354840601	6.11542460053885	7.12548440630801	0.131780451613534	no	7.17938218028402	no
WBGene00233137	Bm12876	Bma-glrx-10.2	0	0	2773.25674549129	0	0	1105.13261740272	0	0	1292.796454298	no	0.00077291910692597	no
WBGene00226629	Bm6368a	Bm6368a	0	0	758.363869424509	0	7.10445893388429	0.398612017548693	0	2.36815297796143	252.920827147352	no	0.013264579419501	no
WBGene00304199	Bm18580	Bma-mcrs-1.2	2	0	0	0	1.76561598279777	59.1411768488416	1.37915319634357	1.04825639304711	19.7137256162805	no	0.0988840168587165	no
WBGene00224946	Bm4685	Bma-mcrs-1.1	1	6.24366678327274	0	0	0.999565224656789	0.168248721505712	1.56155538686828	2.93492913159927	0.0560829071685707	no	3.72596611960048	no
WBGene00222503	Bm2242a	Bma-eat-16	0	0	17.7031995272799	0	1.7480946028158	0.441363917140747	0.682733471625043	0.810276024813616	6.04818781480687	no	0.256842761909746	no
WBGene00223751	Bm3490	Bma-unc-38.1	4	0	0	0	0	0	0	0	0	no	1	no
WBGene00233138	Bm12877	Bm12877	0	0	52.3377853248418	0	0	969.403384410563	0	0	340.580389911801	no	0.00292756853008514	no
WBGene00223850	Bm3589a	Bma-lim-9	0	0	59.0183384009833	0	0.0757903005026875	2.41110468850742	0.118402230392693	0.0647308436317936	20.4764810298303	no	0.0495765969365703	no
WBGene00225226	Bm4965	Bm4965	1	0	0	0	0	10.2468275348003	1.17411335455045	0.391371118183484	3.41560917826676	no	0.315102868485664	no
WBGene00226532	Bm6271	Bma-nduf-7	1	0	915.157660399348	0	1.39890282815437	7.06397961459229	2.18541441131046	1.19477241315494	307.40721333798	no	0.00711647561482201	no
WBGene00226533	Bm6272a	Bma-gei-17	0	0	0	0	0.914903687450541	0	0.714647101740956	0.543183596397166	0	no	1.54318359639717	no
WBGene00226531	Bm6270	Bma-mef-2	0	0	0	0	0	0.0667228355495216	0	0	0.0222409451831739	no	0.978242952125941	no
WBGene00225878	Bm5617	Bma-chaf-1	0	0	0	0	0.547716797342431	0	1.71132427233448	0.753013689892303	0	no	1.7530136898923	no
WBGene00225877	Bm5616	Bm5616	1	31511.7839168671	1164.38088272046	0	4.72490494433708	216.057857008399	2.46047000778214	10506.3230972731	460.146246576287	no	22.7852295779986	no
WBGene00235395	NA	NA	NA	0	0	0	0	0	0	0	0	no	1	no
WBGene00225504	Bm5243a	Bma-gsa-1	0	0	0.388485792856272	0	0.289873915150469	0	0.452851062191801	0.247574992447423	0.129495264285424	no	1.10454203031715	no
WBGene00226630	Bm6369a	Bma-vps-4	1	0	0	0	0.93001377948641	0.156541689848214	0	0.310004593162137	0.0521805632827381	no	1.24503781848526	no
WBGene00226625	Bm6364a	Bma-npr-23	7	0	33.1693602158047	0	0.845331830819012	0.569151452151474	1.32060664131238	0.721979490710463	11.2461705559854	no	0.140613711269017	no
WBGene00223429	Bm3168a	Bma-aat-2	12	7.03948848448713	0	0	0	0	0.880296110067723	2.63992819818495	0	no	3.63992819818495	no
WBGene00222426	Bm2165a	Bm2165a	7	0	0	0	0	940.330571316934	0	0	313.443523772311	no	0.0031802213256079	no
WBGene00233143	Bm12882a	Bm12882a	0	0	34.6421073633496	0	0.656349650240385	0.331434067901622	1.02537213852543	0.560573929588605	11.6578471437504	no	0.123289048434995	no
WBGene00221293	Bm1032	Bm1032	0	0	0	0	0	8.16962626332456	0	0	2.72320875444152	no	0.268585530909883	no
WBGene00223416	Bm3155	Bm3155	0	0	23.2213105563701	0	0	0	1.40791947710162	0.469306492367208	7.74043685212337	no	0.168104468601047	no
WBGene00224434	Bm4173a	Bm4173a	4	0	115.034224124747	0	0	43.1959593539387	0	0	52.7433944928951	no	0.0186069378280935	no
WBGene00233144	Bm12883a	Bm12883a	1	0	2514.79772313527	0	0	0	0	0	838.265907711757	no	0.00119151748070702	no
WBGene00227808	Bm7547	Bm7547	6	0	0	0	0	0.100092916377457	0	0	0.0333643054591523	no	0.967712930200035	no
WBGene00268787	Bm17645	Bm17645	0	0	0	0	0	0	0	0	0	no	1	no
WBGene00233145	Bm12884	Bma-col-79	1	0	0	0	0	0.229712646584974	0	0	0.0765708821949913	no	0.928875206025568	no
WBGene00227876	Bm7615	Bma-let-23	0	2.33462389431661	0.250451914767794	0	0.56063422466673	0.0629113466573504	0.875842188179017	1.25703343572078	0.104454420475048	no	2.043573183174	no
WBGene00221896	Bm1635	Bm1635	0	0	0	0	0	0	0	0	0	no	1	no
WBGene00224448	Bm4187	Bm4187	0	0	0	0	0	0.0459151662858351	0.426149302122123	0.142049767374041	0.0153050554286117	no	1.12483411883724	no
WBGene00233146	Bm12885	Bm12885	0	0	801.147425247528	0	2.68150343054883	0	8.37827492111294	3.68659278388726	267.049141749176	no	0.0174840805432337	no
WBGene00226632	Bm6371d	Bma-ccar-1	1	2.52039384647609	226.102716338511	0	0.713470951195982	0.200154647922726	0.371536337243247	1.20180037830511	75.4342903288114	no	0.0288064475882908	no
WBGene00233147	Bm12886	Bma-mrpl-55	0	0	5211.78590545083	0	0	3313.45473025779	0	0	2841.74687856954	no	0.000351772437967884	no
WBGene00227248	Bm6987	Bma-dpm-1	0	0	274.798100399819	0	11.9582450636486	0.754812965345142	5.83799509026636	5.93208005130498	91.8509711217214	no	0.0746581319243014	no
WBGene00233148	Bm12887	Bm12887	0	0	0	0	0	0	0	0	0	no	1	no
WBGene00221295	Bm1034	Bm1034	1	0	0	0	0	0	0	0	0	no	1	no
WBGene00226289	Bm6028	Bma-par-6	0	0	0	0	0	0	0	0	0	no	1	no
WBGene00226290	Bm6029	Bm6029	0	0	3.99422885541496	0	0	0.082415612779471	0	0	1.35888148939814	no	0.423929733008819	no
WBGene00223025	Bm2764	Bm2764	0	0	0	0	2.18650916265631	0	1.13861342817162	1.10837419694264	0	no	2.10837419694264	no
WBGene00233149	Bm12888	Bm12888	1	0	0	0	0	0	0	0	0	no	1	no
WBGene00227619	Bm7358	Bm7358	8	0	0	0	0	0	0	0	0	no	1	no
WBGene00224604	Bm4343a	Bma-pat-10	0	636.814702146411	44217.7774774633	0	0	27514.3723622695	15.201940756297	217.338880967569	23910.7166132443	no	0.00913104167714313	no
WBGene00226815	Bm6554a	Bm6554a	4	0	0	0	1.05335967326987	0.0886517527528947	0	0.351119891089958	0.0295505842509649	no	1.31233949235525	no
WBGene00221296	Bm1035	Bm1035	0	0	0	0	0	0	0	0	0	no	1	no
WBGene00233150	Bm12889	Bm12889	0	0	0	0	0	0	0	0	0	no	1	no
WBGene00233587	Bm13326	Bm13326	0	0	0	0	0	0	0	0	0	no	1	no
WBGene00221297	Bm1036a	Bm1036a	4	14.0120510090752	0	0	1.32217316956623	1.11275352473899	4.13108936641481	6.48843784835209	0.370917841579663	no	5.46235348408874	no
WBGene00225074	Bm4813	Bm4813	0	0	0	0	5.00000858010634	1.8936246663353	3.90559322195985	2.96853393402206	0.631208222111768	no	2.43288004573958	no
WBGene00225075	Bm4814a	Bma-apr-1	0	7.52060212610923	0	0	6.83972159343803	0.548226171198387	5.08821418193034	6.4828459671592	0.182742057066129	no	6.32669306249319	no
WBGene00226233	Bm5972a	Bma-rab-10	3	0	0	0	0	0	0	0	0	no	1	no
WBGene00224618	Bm4357	Bma-gtl-2	8	2.50117863271164	53.635716024589	0	1.80189153411421	0.134799028141139	1.25110102861172	1.85139039847919	17.9235050175767	no	0.150679823628378	no
WBGene00233151	Bm12890a	Bm12890a	0	0	0	0	0	0	0	0	0	no	1	no
WBGene00227629	Bm7368a	Bma-gld-2	0	0	0	0	0.175264344840709	0.0590016563553629	0	0.0584214482802363	0.019667218785121	no	1.03800674257361	no
WBGene00225749	Bm5488a	Bma-kin-10	0	0	0	0	1.03620087316231	11.860240645218	0	0.345400291054103	3.95341354840601	no	0.27161073427577	no
WBGene00233153	Bm12892a	Bm12892a	0	2.73007741205799	26.8196580019026	0	0.655598033120156	0.331054527027987	1.36559724833103	1.58375756450306	9.05023750964354	no	0.257084229305413	no
WBGene00226886	Bm6625	Bm6625	0	0	506.087919757227	0	0.710739891275203	0	0	0.236913297091734	168.695973252409	no	0.00728899615815825	no
WBGene00235392	NA	NA	NA	0	0	0	0	0	0	0	0	no	1	no
WBGene00225967	Bm5706	Bma-pcbd-1	0	0	2228.11952932985	0	0	801.64054071211	1.85172018184018	0.617240060613393	1009.92002334732	no	0.00159977052908543	no
WBGene00222526	Bm2265a	Bm2265a	0	0	0	1091.05942368185	6.41457683386192	0.719809189485688	13.361431900337	6.59200291139963	363.926410957113	no	0.0208042023910729	no
WBGene00255513	Bm16927	Bm16927	2	0	0	0	0	0	0	0	0	no	1	no
WBGene00223610	Bm3349	Bma-dylt-1	0	0	0	0	0	0	0	0	0	no	1	no
WBGene00231406	Bm11145	Bma-ttx-7	0	0	1584.53282228478	0	0	0.272697432592562	0	0	528.268506572458	no	0.00188940015810878	no
WBGene00233992	Bm13731a	Bma-eif-2gamma	0	0	0	0	0	0	0	0	0	no	1	no
WBGene00225953	Bm5692a	Bma-pigv-1	10	0	0	0	1.03503002471806	1.5679640175034	0	0.345010008239353	0.522654672501134	no	0.883332269969015	no
WBGene00226436	Bm6175a	Bma-ints-4	1	0	0.45199683246124	0	0.331500279341156	0.0557987581021404	0	0.110500093113719	0.16926519685446	no	0.949741851635685	no
WBGene00234120	Bm13859	Bma-idh-2	0	0	427.176280688028	0	0	0	1.27631944035506	0.425439813451686	142.392093562676	no	0.00994085362753025	no
WBGene00226933	Bm6672a	Bma-nsun-2	1	0	0.664816050918801	0	0.245893259925771	0	1.53657184207676	0.594155034000845	0.221605350306267	no	1.30496729864614	no
WBGene00226934	Bm6673	Bma-smg-2	0	0	0	0	0.999419812200482	0.0560747484680806	1.04088547899774	0.68010176373274	0.0186915828226935	no	1.64927421808801	no
WBGene00233154	Bm12893	Bm12893	0	0	1.09413111000519	0	0.816400687946062	0.137418117992722	0	0.272133562648687	0.410516409332636	no	0.901892068912958	no
WBGene00234628	Bm14367	Bm14367	0	0	0	0	0	0	0	0	0	no	1	no
WBGene00233155	Bm12894	Bm12894	0	0	0	0	0	0	0	0	0	no	1	no
WBGene00224388	Bm4127	Bma-sptf-1	1	0	0	0	0	0	0.840978700356188	0.280326233452063	0	no	1.28032623345206	no
WBGene00224389	Bm4128	Bma-ned-8	0	0	14496.4187140358	0	0	4253.0320978	18942.3960913183	6314.13203043942	6249.81693727859	no	1.01028907002176	no
WBGene00224047	Bm3786	Bma-tsp-8	4	0	44.0133448252105	0	0.542012764423362	0	0	0.180670921474454	14.6711149417368	no	0.0753405820749853	no
WBGene00233157	Bm12896	Bma-nas-13	0	0	1.94259277393752	0	0	0	0	0	0.647530924645841	no	0.606968879940729	no
WBGene00268788	Bm17646	Bm17646	0	0	0	0	0	0	0	0	0	no	1	no
WBGene00233158	Bm12897	Bm12897	0	0	1.30636598559742	0	1.15763952971036	0.194856089461413	1.50708711404298	0.888242214584445	0.500407358352946	no	1.25848637309886	no
WBGene00226843	Bm6582	Bma-pisy-1	3	24.5777329905118	0	0	8.85310797560066	0.827873326824712	15.3673685193953	16.2660698285026	0.275957775608237	no	13.5318504723027	no
WBGene00223354	Bm3093a	Bma-mek-5	0	0	0	0	1.7612027915314	0.222336755029563	0	0.587067597177134	0.0741122516765211	no	1.47756213999046	no
WBGene00234001	Bm13740a	Bm13740a	0	492.745684892121	42.289432917303	0	0	0.32021418149083	0	164.248561630707	14.2032156995979	no	10.8693163930495	no
WBGene00225596	Bm5335a	Bma-lpd-8	0	0	0	0	3.12842066897364	2.63290861318023	0	1.04280688965788	0.877636204393411	no	1.08796735218355	no
WBGene00233160	Bm12899	Bm12899	0	0	672.338878222753	0	0	0	0	0	224.112959407584	no	0.00444221426714676	no
WBGene00231407	Bm11146	Bm11146	1	372.375729216014	0	0	48.3803647117332	2.71449169696892	50.387653398806	157.047915775518	0.904830565656305	no	82.9721648870448	no
WBGene00224014	Bm3753	Bm3753	0	0	3.99272907980943	0	3.29118127290702	0.941762425479012	2.57079864279622	1.95399330523441	1.64483050176281	no	1.11689323881645	no
WBGene00225238	Bm4977a	Bma-zig-1	1	0	0	0	9.33742682849624	0.785846729805476	1.82340641759186	3.72027774869603	0.261948909935159	no	3.74046660014039	no
WBGene00233161	Bm12900	Bm12900	0	11.8510692630305	221.866419216415	0	1.89726920438169	0.159675982174642	0	4.58277948913741	74.0086983995299	no	0.0744284277458198	no
WBGene00224943	Bm4682a	Bma-sacy-1	1	0	11.4407222976432	0	0.500110052345207	0.0841794760798397	0	0.166703350781736	3.84163392457434	no	0.240973061771561	no
WBGene00221899	Bm1638	Bm1638	1	0	0	0	0	0	0	0	0	no	1	no
WBGene00233484	Bm13223a	Bm13223a	0	0	228.605208971937	0	7.27273975288195	1.53020175057398	8.52129430245786	5.2646780184466	76.7118035741703	no	0.0806142404411888	no
WBGene00233163	Bm12902	Bm12902	0	0	1.55034464679357	0	1.13704266618108	0	0	0.379014222060361	0.51678154893119	no	0.909171279827404	no
WBGene00227630	Bm7369	Bma-cuti-1	4	0	0	0	0	0.24136369503418	0	0	0.0804545650113935	no	0.925536373655337	no
WBGene00224781	Bm4520a	Bm4520a	0	0	598.783953522531	0	2.53740047610937	0	0	0.845800158703122	199.594651174177	no	0.00920164195754357	no
WBGene00233164	Bm12903	Bma-apc-11.2	0	0	0	0	0	0	1.94219510929165	0.647398369763884	0	no	1.64739836976388	no
WBGene00224072	Bm3811	Bm3811	10	0	0	0	0	0.0707391853495295	0	0	0.0235797284498432	no	0.97696346674865	no
WBGene00223447	Bm3186a	Bma-unc-87	0	0	96.7769932898724	0	0.267398870818391	0	0.417739770120881	0.228379546979757	32.2589977632908	no	0.0369337511527652	no
WBGene00225047	Bm4786a	Bma-clik-3	0	0	904.708044999832	0	3.63348501338945	3441.59860856978	1.41908900885174	1.68419134074706	1448.7688845232	no	0.00185146154632077	no
WBGene00234935	Bm14750a	Bm14750a	0	0	1.6864132425829	0	0.618418560542453	0	0.966114877481832	0.528177812674762	0.562137747527635	no	0.978260601597637	no
WBGene00221987	NA	NA	NA	0	0	0	0	0	0	0	0	no	1	no
WBGene00234065	Bm13804	Bma-apg-1	0	3.85195653708842	0	0	0.925004953422124	0.259497657849459	1.92676633435585	2.23457594162213	0.0864992192831529	no	2.97706237079142	no
WBGene00227496	Bm7235	Bm7235	0	0	0	0	0	0	0	0	0	no	1	no
WBGene00233166	Bm12905	Bm12905	4	0	235.928174222376	0	0	958.836559434164	0	0	398.254911218847	no	0.00250466549540292	no
WBGene00233167	Bm12906	Bm12906	0	0	0	0	0	0.182077383547277	1.68990240496704	0.56330080165568	0.0606924611824258	no	1.4738492625025	no
WBGene00222144	Bm1883a	Bm1883a	0	0	1612.00650430952	0	1.32830854390296	0	0	0.44276951463432	537.335501436506	no	0.00268005641609072	no
WBGene00223609	Bm3348	Bma-ztf-2	0	0	0	0	1.45736355304754	0.408843679433163	3.03565837192637	1.4976739749913	0.136281226477721	no	2.19811250664914	no
WBGene00223662	Bm3401a	Bm3401a	0	0	0	0	0.513108655543066	0.0863674257157934	0	0.171036218514355	0.0287891419052645	no	1.13826650264374	no
WBGene00226697	Bm6436a	Bma-tftc-1	0	6.62882160993231	0	0	6.69016442768654	0.463688734625726	1.84440112973804	5.05446238911896	0.154562911541909	no	5.24394325211199	no
WBGene00223878	Bm3617	Bm3617	1	13.789132015749	82.6242128972972	0	0	0.438020251101802	0	4.59637733858301	27.6874110494663	no	0.195081296424172	no
WBGene00235022	Bm14687a	Bm14687a	1	0	1043.05499951066	0	7.47451303039968	164.657012874401	5.83847146685471	4.4376614990848	402.57067079502	no	0.0134738768017329	no
WBGene00224071	Bm3810	Bma-ncbp-1.2	0	0	0	0	0	0.0614471259317051	1.14061004027267	0.380203346757556	0.0204823753105684	no	1.35250091540044	no
WBGene00233169	Bm12908	Bm12908	0	0	0	0	1.75460020882453	0.675057479806631	1.1747559297226	0.976452046182377	0.225019159935544	no	1.61340500689505	no
WBGene00227463	Bm7202	Bma-nas-30	0	0	0	0	0	0.399911775127776	0.530239127214351	0.176746375738117	0.133303925042592	no	1.03833256881546	no
WBGene00223654	Bm3393a	Bma-cids-2.2	0	0	0	0	0.483225138149125	0.162674750356441	0	0.161075046049708	0.0542249167854802	no	1.10135420588429	no
WBGene00235079	Bm14744	Bma-timm-23.5	3	355.568465929674	595.628532245695	0	0	0.293346895715058	1968.45465138577	774.674372438483	198.64062638047	no	3.88535332963854	no
WBGene00233170	Bm12909	Bma-timm-23.1	0	0	0	0	0	0.263111140593574	0	0	0.0877037135311914	no	0.919368011306623	no
WBGene00234629	Bm14368	Bm14368	0	36.0607315716468	0	0	0	0	0	12.0202438572156	0	no	13.0202438572156	no
WBGene00233172	Bm12911	Bm12911	2	0	9.19252439246981	0	0	0	0	0	3.06417479748994	no	0.246052409118232	no
WBGene00227059	Bm6798	Bma-nduf-5	0	0	149.488535404896	0	17.2180746593136	1906.58782552626	0	5.73935821977119	685.358786977051	no	0.00981900188012968	no
WBGene00233173	Bm12912	Bm12912	0	6.44190074329108	22.3064422687027	0	0	0.0867952760571011	0	2.14730024776369	7.46441251491993	no	0.37182737044255	no
WBGene00227302	Bm7041	Bm7041	1	0	0	0	2.45357563895218	0	1.27768692546972	1.24375418814064	0	no	2.24375418814064	no
WBGene00224782	Bm4521a	Bma-spg-20	0	0	9.24299162298588	0	4.10476705182201	0.997998739813706	8.5501455279392	4.21830419325374	3.41366345426653	no	1.18230677244079	no
WBGene00220989	Bm728	Bm728	0	0	0	0	11.1526165406917	3.12871607929859	3.87177856202946	5.00813170090707	1.0429053597662	no	2.94097407507643	no
WBGene00227621	Bm7360a	Bm7360a	0	0	269.640197633339	0	0.328080792219012	0.165669550559994	1.02507833562041	0.45105304261314	89.9352890612998	no	0.0159569849900073	no
WBGene00226451	Bm6190a	Bma-nhr-85	0	4.71853557660493	0	0	1.13310436897016	1.14435770698541	5.31052457889445	3.72072150815651	0.381452568995137	no	3.41721577280814	no
WBGene00221303	Bm1042a	Bm1042a	0	0	6.00938977661995	0	0	0	0	0	2.00312992553998	no	0.332985926281626	no
WBGene00225300	Bm5039a	Bm5039a	1	0	0	0	0	0	0	0	0	no	1	no
WBGene00225302	Bm5041a	Bm5041a	0	0	9.92145828738538	0	0	0.207682015608613	0	0	3.376380100998	no	0.228499348073527	no
WBGene00235393	NA	NA	NA	0	0	0	0	0	0	0	0	no	1	no
WBGene00268789	Bm17647	Bm17647	0	0	0	0	0	0	0	0	0	no	1	no
WBGene00222419	Bm2158a	Bma-lin-41	0	4.63595546928467	0	0	0.742182443587329	0.187388342717349	1.73919464818436	2.37244418701879	0.0624627809057829	no	3.17417630775138	no
WBGene00223663	Bm3402	Bma-rtcb-1	0	0	0	0	0.584482881492778	0.0983812713041312	0	0.194827627164259	0.0327937571013771	no	1.15688889378809	no
WBGene00227523	Bm7262	Bm7262	0	0	0	0	0	0	0	0	0	no	1	no
WBGene00222618	Bm2357a	Bma-iars-2	0	0	0	0	425.992509017118	0.0565934254837155	1.05051340223615	142.347674139785	0.0188644751612385	no	140.693563898279	no
WBGene00227525	Bm7264b	Bma-sec-8	0	0	31.9058443021505	0	0.684195975407441	0	1.0688746314058	0.584356868937748	10.6352814340502	no	0.136168332319079	no
WBGene00233175	Bm12914	Bm12914	0	0	0	0	0	0.229575831429176	0	0	0.0765252771430586	no	0.928914556148514	no
WBGene00233176	Bm12915	Bm12915	1	0	0	0	0.734210942510004	0	0	0.244736980836668	0	no	1.24473698083667	no
WBGene00221304	Bm1043	Bm1043	0	0	0	0	0	0	0	0	0	no	1	no
WBGene00223325	Bm3064a	Bma-maco-1	5	4.6307026871084	0	0	0.741341511715346	0	0.579074682958113	1.98370629392729	0	no	2.98370629392729	no
WBGene00225703	Bm5442a	Bma-pro-1	1	4.65545220558571	142.63547779986	0	0.878574306421908	0.0739416499078431	0	1.84467550400254	47.5698064832559	no	0.0585688045716884	no
WBGene00223748	Bm3487a	Bma-mrps-33	0	0	0	0	0	0	0	0	0	no	1	no
WBGene00221900	Bm1639	Bm1639	0	0	20.9729232134251	0	0	0	0	0	6.99097440447505	no	0.125141184214029	no
WBGene00227342	Bm7081	Bma-josd-1	2	0	0	0	0	0	0	0	0	no	1	no
WBGene00227588	Bm7327	Bma-rnf-145	14	0	0	0	0	0.108153148420198	0	0	0.0360510494733994	no	0.965203404319002	no
WBGene00227587	Bm7326	Bma-mrpl-19	0	0	188.354244459666	0	0	0	0	0	62.7847481532221	no	0.0156777290646006	no
WBGene00233179	Bm12918a	Bm12918a	0	0	0	0	0	0.102460877450714	0	0	0.0341536258169047	no	0.966974320870436	no
WBGene00234200	Bm13939a	Bma-riok-1	0	0	0	0	0.499129016933022	0.168028692663289	0	0.166376338977674	0.0560095642210965	no	1.10451304466923	no
WBGene00233180	Bm12919	Bm12919	0	0	56.8612702028719	0	0	30.4038832896407	0	0	29.0883844975042	no	0.0332354168128551	no
WBGene00225480	Bm5219	Bm5219	0	12.6796616236773	0	0	0	0	0	4.22655387455909	0	no	5.22655387455909	no
WBGene00224012	Bm3751a	Bm3751a	0	0	0.4442729825658	0	0.994500838023467	0.167396274306421	0.517881208933877	0.504127348985781	0.20388975229074	no	1.24938961073782	no
WBGene00221901	Bm1640	Bm1640	0	0	0	0	0	0	0	0	0	no	1	no
WBGene00225247	Bm4986	Bma-unc-14	0	0	0	0	0	0.958373498183953	0	0	0.319457832727985	no	0.757887046630733	no
WBGene00233181	Bm12920	Bm12920	0	0	2932.07154802105	0	1.49575697562946	1305.42051059915	4.67344662484027	2.05640120015658	1412.4973528734	no	0.00216229708102631	no
WBGene00234319	Bm14058a	Bma-rpb-6	0	0	974.892421833742	0	0	1143.42742558475	0	0	706.106615806165	no	0.00141421389313394	no
WBGene00222407	Bm2146	Bma-viln-1	2	0	0	0	0.977589724520258	0.082274881743775	0.763612250013922	0.58040065817806	0.0274249605812583	no	1.5382151678347	no
WBGene00255601	Bm16946a	Bma-him-6	1	0	1.07947938414598	0	0	0.333152827112866	0	0	0.470877403752949	no	0.679866314791768	no
WBGene00255602	Bm16947	Bm16947	0	0	10.4361182132095	0	0	0	0	0	3.47870607106984	no	0.22327877385379	no
WBGene00225797	Bm5536	Bma-let-502	2	0	0	0	0.273629337996021	0.0460578110849069	0	0.0912097793320071	0.015352603694969	no	1.07471017985376	no
WBGene00222408	Bm2147a	Bma-mlst-8	0	0	93.9052626704552	0	0	0.119373744493523	0	0	31.3415454716496	no	0.0309199818814037	no
WBGene00227215	Bm6954	Bm6954	1	0	0	0	0	0	0	0	0	no	1	no
WBGene00226582	Bm6321a	Bma-hgap-1	0	2.23593811937703	122.359389801999	0	0.210982488454828	0.106538922324374	0.659208290273673	1.03537629936851	40.8219762414411	no	0.0486676260255648	no
WBGene00226581	Bm6320a	Bm6320a	0	0	1268.64355026532	0	0	0	0	0	422.881183421773	no	0.002359151665869	no
WBGene00223669	Bm3408	Bm3408	0	0	0	0	0.40263805357164	0	0.62901510176971	0.343884385113783	0	no	1.34388438511378	no
WBGene00233182	Bm12921	Bm12921	0	0	101.12088854778	0	0.484862148991892	121.848089499808	0.757468429243114	0.414110192745002	74.3229926825293	no	0.018773951251581	no
WBGene00233183	Bm12922a	Bm12922a	0	0	0	0	0.307961797967819	0	0	0.10265393265594	0	no	1.10265393265594	no
WBGene00221904	Bm1643	Bm1643	1	0	0	0	0	0	0	0	0	no	1	no
WBGene00221906	Bm1645	Bm1645	0	0	0	0	0	0.761774349742265	0	0	0.253924783247422	no	0.797496000844799	no
WBGene00221907	Bm1646	Bm1646	0	0	0	0	0	0	0	0	0	no	1	no
WBGene00221908	Bm1647	Bm1647	0	0	0	0	0	0	0	0	0	no	1	no
WBGene00233184	Bm12923	Bm12923	0	0	0	0	0	0	0	0	0	no	1	no
WBGene00233185	Bm12924	Bm12924	0	0	0	0	0	0	0	0	0	no	1	no
WBGene00221305	Bm1044	Bm1044	0	0	0	0	0	0	0	0	0	no	1	no
WBGene00221306	Bm1045	Bm1045	0	0	0	0	0	0	5.43696564029669	1.8123218800989	0	no	2.8123218800989	no
WBGene00233186	Bm12925	Bm12925	0	0	0	0	1.29701174087489	0	1.21574197711211	0.837584572662332	0	no	1.83758457266233	no
WBGene00233188	Bm12927	Bm12927	0	0	0	0	1.48284303670756	0.249594962855333	0.772182903370435	0.751675313359331	0.0831983209517777	no	1.61713259656845	no
WBGene00227299	Bm7038	Bma-cogc-3	0	0	0	0	0.381921936238943	0.128571654759702	1.19330333266018	0.525075089633042	0.0428572182532339	no	1.46240066515291	no
WBGene00227301	Bm7040	Bma-trap-1	1	10.5139585450039	1.14751713290785	0	0	0.566641412671203	1.31478257674209	3.94291370724867	0.571386181859683	no	3.1455753934395	no
WBGene00223554	Bm3293	Bma-kpc-1	2	0	0	0	0	0	0	0	0	no	1	no
WBGene00268791	Bm17649	Bm17649	0	0	0	0	0	0	0	0	0	no	1	no
WBGene00233189	NA	NA	NA	0	0	0	0	0	0	0	0	no	1	no
WBGene00224415	Bm4154	Bm4154	1	0	0	0	0.267899383445099	0	0.418521688268042	0.22880702390438	0	no	1.22880702390438	no
WBGene00221307	Bm1046	Bm1046	0	0	0	0	0	0	0	0	0	no	1	no
WBGene00233190	Bm12929	Bma-rps-19.1	0	0	941.693058952194	0	0	0	0	0	313.897686317398	no	0.00317563463769645	no
WBGene00226760	Bm6499a	Bma-sptf-3	0	0	338.541814845235	0	3.72459300030692	5.53788682878505	4.84890673802551	2.85783324611081	114.69323389134	no	0.0333453661580081	no
WBGene00234115	Bm13854a	Bma-ola-1	0	0	12.5746559112417	0	0.776272518538544	0.130663668125283	0	0.258757506179515	4.23510652645566	no	0.240445442670244	no
WBGene00226496	Bm6235a	Bma-snr-2	0	0	1069.34426277829	0	123.450346613946	396.678695542286	0	41.1501155379821	488.674319440192	no	0.0860778559638765	no
WBGene00233936	Bm13675	Bma-pas-4	0	0	178.372036413312	0	2.3547598248727	0.396357656523996	0	0.784919941624234	59.5894646899452	no	0.0294592459391779	no
WBGene00233191	Bm12930	Bm12930	1	0	0	0	1.43394109560971	0.482727390068361	2.24015240533201	1.22469783364724	0.160909130022787	no	1.91634106073709	no
WBGene00228423	Bm8162	Bm8162	0	0	0	0	0	0	0	0	0	no	1	no
WBGene00268792	Bm17650	Bm17650	0	0	0	0	0	0	0	0	0	no	1	no
WBGene00228425	Bm8164	Bm8164	0	16.2987725639478	0	0	0	0	0	5.4329241879826	0	no	6.4329241879826	no
WBGene00222782	Bm2521a	Bma-sem-2	0	0	0	0	1.34350479887868	0	2.09886969276341	1.14745816388069	0	no	2.14745816388069	no
WBGene00225150	Bm4889a	Bma-fecl-1	0	0	29.1598166467372	0	0	0	0	0	9.71993888224574	no	0.0932841139286895	no
WBGene00233196	Bm12935	Bm12935	0	0	0	0	1.67520404512707	0.281973533993845	2.61706173468561	1.43075525993756	0.0939911779979483	no	2.22191486441961	no
WBGene00224953	Bm4692a	Bma-hpo-11	0	0	0	0	0.392191116576247	0	0.612694535248369	0.334961883941538	0	no	1.33496188394154	no
WBGene00223133	Bm2872	Bma-magu-3	0	825.243630089031	2.26855529359564	0	0.417731472033693	0.070313356616123	1.30518912488698	275.655516895317	0.77962288340392	no	155.45738340145	no
WBGene00225700	Bm5439	Bma-lst-2	0	0	9.94100443820714	0	0.431913227025406	0	0	0.143971075675135	3.31366814606905	no	0.265196820185997	no
WBGene00233991	Bm13730	Bm13730	0	0	246.325784560915	0	0	0	0	0	82.1085948536385	no	0.0120324498538459	no
WBGene00268793	Bm17651	Bm17651	0	0	0	0	0	0.0897248186614493	0	0	0.0299082728871498	no	0.970960255709659	no
WBGene00233197	Bm12936	Bma-tsp-20	4	0	0	0	0	0	1.79955904995736	0.599853016652452	0	no	1.59985301665245	no
WBGene00233198	Bm12937a	Bm12937a	0	0	0	0	0	0.0756392898291966	0	0	0.0252130966097322	no	0.975406969835726	no
WBGene00223752	Bm3491	Bm3491	4	0	0	0	0	0	0	0	0	no	1	no
WBGene00224779	Bm4518	Bma-tmed-3	2	0	151.534618690247	0	0.632597770632239	0	0	0.21086592354408	50.5115395634157	no	0.0235066925548476	no
WBGene00233199	Bm12938	Bm12938	1	0	0	0	0	0	0	0	0	no	1	no
WBGene00234216	Bm13955a	Bma-nol-58	1	0	129.492065383817	0	3.61960578981355	0	0	1.20653526327118	43.1640217946056	no	0.0499622809157453	no
WBGene00234153	Bm13892	Bm13892	1	0	943.283243204588	0	0	109.339920490475	0	0	350.874387898354	no	0.00284192323849632	no
WBGene00224700	Bm4439a	Bma-zipt-2.4	8	0	0	0	0	0	0.746094555018816	0.248698185006272	0	no	1.24869818500627	no
WBGene00233200	Bm12939a	Bm12939a	0	0	26.8078020326553	0	0.246382691881081	0.0207358018704388	0.192453784029008	0.146278825303363	8.94284594484193	no	0.11528679330469	no
WBGene00226511	Bm6250a	Bma-rpl-31	0	0	803.942827031035	0	0	67.7927838767264	0	0	290.578536969254	no	0.00342960771528066	no
WBGene00223261	Bm3000a	Bm3000a	10	0	0	0	0.560108580087735	0	0.875021008026226	0.47837652937132	0	no	1.47837652937132	no
WBGene00226890	Bm6629	Bma-dnj-27	1	0	232.678285645518	0	0.401825571098211	0	0	0.133941857032737	77.559428548506	no	0.0144341917702799	no
WBGene00234212	Bm13951a	Bma-crn-1	0	0	0	0	0	0.138604034868603	0	0	0.0462013449562011	no	0.955838954729947	no
WBGene00227508	Bm7247a	Bma-exoc-8	0	0	0	0	0.847678670993412	0	0	0.282559556997804	0	no	1.2825595569978	no
WBGene00233203	Bm12942	Bm12942	1	0	0	0	1.29966170810937	0.218761532899879	0	0.433220569369789	0.0729205109666262	no	1.33581244343866	no
WBGene00233204	Bm12943a	Bm12943a	0	0	0	0	0.708102637504237	0.158918911964373	1.10622244629413	0.60477502793279	0.0529729706547909	no	1.52404199600191	no
WBGene00234329	Bm14068	Bm14068	0	15.6930780038155	1384.90906044115	0	0	50.5345141040763	1.96243740609722	5.88517180330425	478.481191515075	no	0.0143596285425677	no
WBGene00224092	Bm3831	Bm3831	1	0	315.518102152412	0	0	0	0	0	105.172700717471	no	0.0094186169631404	no
WBGene00233207	Bm12946a	Bm12946a	0	0	319.593454933443	0	0	1.83426563343787	0	0	107.142573522294	no	0.00924705199283841	no
WBGene00233487	Bm13226	Bm13226	0	0	0	0	0	0	0	0	0	no	1	no
WBGene00225752	Bm5491	Bma-pgrn-1	0	0	0	0	1.21905985077919	0.102597237415381	0	0.406353283593062	0.0341990791384603	no	1.35984774301349	no
WBGene00224126	Bm3865a	Bma-madf-2.2	0	39.3526021965239	334.79911598135	0	1.25250898615608	1.33522308084269	0.652237628316358	13.7524496036654	112.044779687398	no	0.130500936394058	no
WBGene00269358	Bm18209a	Bma-madf-2.1	0	0	4.25959439773011	0	0	1.20371977402022	0	0	1.82110472391678	no	0.354471066430889	no
WBGene00224849	Bm4588	Bma-che-13	1	0	0	0	0	0	0	0	0	no	1	no
WBGene00226763	Bm6502	Bma-slc-25A46	6	0	0	0	0.661086584783113	0	2.0655446832074	0.908877089330173	0	no	1.90887708933017	no
WBGene00226880	Bm6619c	Bma-spg-7	2	0	0	0	27.6760233214052	2.32924046641755	15.7754583644473	14.4838272286175	0.776413488805851	no	8.71634184619152	no
WBGene00226879	Bm6618	Bm6618	0	0	0	0	0	103.159384778719	0	0	34.3864615929064	no	0.0282593951185122	no
WBGene00222817	Bm2556a	Bma-figo-1	0	3.24884502646831	30.2062178571008	0	5.21152166060348	0.258003896231316	1.91567517607241	3.45868062104807	10.154740584444	no	0.399711726803039	no
WBGene00235396	NA	NA	NA	0	0	0	0	0	0	0	0	no	1	no
WBGene00225481	Bm5220	Bm5220	2	0	0	0	0	0	0	0	0	no	1	no
WBGene00222474	Bm2213a	Bma-popl-4	0	0	349.455704546016	0	0	2976.07324190364	0	0	1108.50964881655	no	0.000901299056810043	no
WBGene00233208	Bm12947a	Bm12947a	0	3.4071139053374	0	0	0.964482912967305	0.0541145333384229	1.00449905694657	1.79203195841709	0.0180381777794743	no	2.74256115277231	no
WBGene00233903	Bm13642	Bm13642	0	0	0	0	3.03714049030332	0	0	1.01238016343444	0	no	2.01238016343444	no
WBGene00303429	Bm18577	Bma-sqv-1	0	0	0	0	1.74012456663275	0.585802159528246	2.71848282014835	1.48620246226037	0.195267386509415	no	2.08003873469761	no
WBGene00224967	Bm4706	Bma-cox-11	1	0	257.800026758149	0	3.6291662911073	0	2.8348045889978	2.15465696003503	85.9333422527163	no	0.0362882281790617	no
WBGene00226199	Bm5938a	Bma-ckr-1	7	4.50173851747696	0	0	2.97347941157873	0.357501225161924	0.66361034897333	2.71294275934301	0.119167075053975	no	3.31759470243881	no
WBGene00227672	Bm7411a	Bma-nekl-2	0	177.756280867263	882.399468997622	0	1.75883558347827	0	5.49542763642892	61.6701813623902	294.133156332541	no	0.212345444819411	no
WBGene00223218	Bm2957	Bm2957	0	23.9574258121602	501.392734216454	0	20.3455433042432	2562.742768243	10.5948372891863	18.2992688018632	1021.37850081982	no	0.0188768335664215	no
WBGene00223612	Bm3351	Bm3351	0	0	0	0	10.417000438311	1.46117445401663	5.42459953194121	5.28053332341741	0.487058151338875	no	4.22346181806187	no
WBGene00221310	Bm1049	Bm1049	0	0	56.8529528004242	0	0	0.392523239276564	0	0	19.0818253465669	no	0.0497962701468746	no
WBGene00223937	Bm3676a	Bma-rsr-1	0	0	506.124131165393	0	4.3262038973968	0.364097437943564	1.12642424159799	1.81754271299826	168.829409534446	no	0.0165904287173936	no
WBGene00221311	Bm1050	Bm1050	insdc=CTP8	0	0	0	3.89740518060319	0.281150854098896	1.73961750124737	1.87900756061686	0.0937169513662986	no	2.63231502174336	no
WBGene00223069	Bm2808	Bma-efsc-1	3	0	320.116097854278	0	1.86482404697777	0.156945366844294	1.45664633196874	1.10715679298217	106.757681073707	no	0.0195545855477425	no
WBGene00223068	Bm2807	Bma-gale-1	0	0	18.3178458053455	0	0	0	0	0	6.10594860178184	no	0.140727164807982	no
WBGene00232703	Bm12442a	Bm12442a	0	0	0	0	0	0.149055615224125	1.38341971821934	0.461139906073115	0.0496852050747082	no	1.39197913718249	no
WBGene00223305	Bm3044a	Bm3044a	0	0	19.9811441226569	0	1.46795123697994	0.741265040326127	0	0.489317078993313	6.90746972099434	no	0.188343064411511	no
WBGene00223337	Bm3076	Bma-sup-17	1	0	0	0	10.8604522410711	1.37103899735117	4.24164358726399	5.03403194277836	0.457012999117057	no	4.14137138545432	no
WBGene00225256	Bm4995a	Bma-mrps-27	0	0	805.440551374759	0	2.13023621366391	250.9957903988	4.43723831480958	2.18915817615783	352.145447257853	no	0.0090307214801193	no
WBGene00222959	Bm2698	Bm2698	2	0	0	0	0	0	0	0	0	no	1	no
WBGene00225257	Bm4996	Bma-blos-9	0	0	0	0	0	0	0	0	0	no	1	no
WBGene00233489	Bm13228	Bma-mek-2.1	0	0	0	0	0	0	1.36442539714539	0.454808465715132	0	no	1.45480846571513	no
WBGene00224757	Bm4496	Bma-png-1	0	7.62283005620988	17.7950059266729	0	4.27125699648839	0.667592815428273	3.33635274969445	5.07681326746424	6.15419958070038	no	0.849405052084015	no
WBGene00233209	Bm12948	Bm12948	0	0	0	0	0	0	0	0	0	no	1	no
WBGene00269324	Bm18184a	Bm18184a	0	0	126.881791057429	0	0	354.549121193888	0	0	160.476970750439	no	0.00619283353751719	no
WBGene00222781	Bm2520a	Bm2520a	0	0	0	0	0	0	0	0	0	no	1	no
WBGene00226574	Bm6313a	Bma-nhx-8	9	0	0	0	0.467061784558169	0.0786167287313045	0	0.15568726151939	0.0262055762437682	no	1.12617519167024	no
WBGene00223334	Bm3073	Bma-lmn-1	0	0	0	0	2.61415973708756	0.110005085893147	2.04196540600184	1.55204171436313	0.0366683619643822	no	2.46177254751681	no
WBGene00234927	NA	NA	NA	0	0	0	0	1457.65084021832	0	0	485.883613406107	no	0.00205387894039865	no
WBGene00221915	Bm1654	Bm1654	1	0	0	0	0	0	5.42871531307318	1.80957177102439	0	no	2.80957177102439	no
WBGene00221916	Bm1655	Bm1655	2	0	0	0	1.63805717431238	0	0	0.546019058104126	0	no	1.54601905810413	no
WBGene00224667	Bm4406	Bma-apm-1	1	63.579131357208	1.04211808610002	0	47.4330185775928	0.785313047815795	49.8059283680558	53.6060261009522	0.60914371130527	no	33.9348348549043	no
WBGene00226891	Bm6630a	Bma-eif-2Bbeta	0	14.2472515941014	0	0	1.14044020402824	0	3.56327031007493	6.31698736940154	0	no	7.31698736940154	no
WBGene00226683	Bm6422a	Bm6422a	3	2.42518960205039	0	0	5.03448450616084	0.154075275694848	4.29002505204184	3.91656638675102	0.051358425231616	no	4.67639414756951	no
WBGene00222121	Bm1860a	Bma-tads-1	0	11.006291314158	3910.03324248283	0	65.4286837053915	41.0805387427904	56.7860855764321	44.4070201986605	1317.03792707521	no	0.0344504655487578	no
WBGene00222622	Bm2361	Bma-mrpl-34	0	17.1148606119311	0	0	19.3794408718367	1.35916015856695	5.04587220213713	13.8467245619683	0.453053386188982	no	10.2176043241658	no
WBGene00222620	Bm2359a	Bma-aha-1.1	0	7.88718633335011	48.2746210002877	0	8.93079205598454	0.375811980145843	108.12794130397	41.6486398977682	16.2168109934779	no	2.47715096099531	no
WBGene00233211	Bm12950	Bm12950	0	0	0	0	2.53880701739324	0.0949637400762715	5.72897315682409	2.75592672473911	0.0316545800254238	no	3.64068245075454	no
WBGene00224192	Bm3931a	Bma-mtcu-1	1	0	0	0	2.94344978109088	0.123861767663749	1.14958977870027	1.36434651993038	0.0412872558879162	no	2.27059968952974	no
WBGene00224190	Bm3929a	Bma-sur-2	1	11.7564669563944	0	0	8.15224318078704	0.42472890935791	2.42585074847617	7.44485362855253	0.141576303119303	no	7.39753760259158	no
WBGene00233212	Bm12951	Bm12951	1	15.9768744882938	1106.89527892181	0	18.090880287205	2111.51713514676	9.420733091021	14.4961626221733	1072.80413802286	no	0.014431088569565	no
WBGene00224689	Bm4428	Bm4428	0	9.78123447071291	155.709943434098	0	3.81243717484246	0.356509268377346	2.64707613119883	5.4135825922514	52.0221509008252	no	0.120960437916742	no
WBGene00225297	Bm5036	Bma-nlp-12	1	0	0	0	0	0	0	0	0	no	1	no
WBGene00225296	Bm5035a	Bma-scm-1	4	0	0	0	12.5047697964958	0.274542607528195	0.849364527852618	4.45137810811613	0.0915142025093984	no	4.99432631804824	no
WBGene00227311	Bm7050a	Bma-tub-2	0	11.7012325036239	0	0	6.59943495587523	0.409252957195071	4.34099607622051	7.54722117857321	0.136417652398357	no	7.52119712372884	no
WBGene00234129	Bm13868a	Bma-nfs-1	1	0	44.4409021357178	0	11.2291791256393	1008.31431297765	5.84753741633741	5.69223884732556	350.918405037789	no	0.0190164502666661	no
WBGene00221966	Bm1705a	Bma-kin-3	0	35177.0633327157	1263.98363800572	0	44.0236843144203	359.717298692359	28.9580308234622	11750.0150159512	541.233645566027	no	21.6714973555072	no
WBGene00221917	Bm1656a	Bm1656a	0	0	0	0	5.88689956218176	0.495447070654995	4.59835911480106	3.49508622566094	0.165149023551665	no	3.8579496139977	no
WBGene00233214	Bm12953	Bma-gsk-3	0	6.13314944344662	0.789081152045046	590.611393865689	4.62977797258267	2.63011401722993	1.8081998439804	4.19037575333657	198.010196344988	no	0.0260809538840862	no
WBGene00226572	Bm6311a	Bm6311a	0	16.5094369712369	1.06203881586471	0	0.778912901254661	0.131108102370608	0	5.76278329083053	0.397715639411772	no	4.83845433229655	no
WBGene00223335	Bm3074	Bma-hlh-16	1	0	1.74338030074944	0	20.4578798855496	1.93697397472154	5.99250149299033	8.81679379284663	1.22678475849033	no	4.40850592111203	no
WBGene00227965	Bm7704b	Bma-xrn-2	0	8.19479059521131	73.1634096571666	0	26.2907761639088	1.95234418860165	20.5361801966432	18.3405823185878	25.0385846152561	no	0.742766267996613	no
WBGene00221312	Bm1051a	Bm1051a	0	1.84436802850704	18.1128282984276	0	2.90164981049778	0.221167344918955	2.22376418127082	2.32326067342521	6.1113318811155	no	0.467319023915941	no
WBGene00226179	Bm5918	Bma-jph-1	1	0	70.4746552847277	0	3.37545325496335	181.73090359042	3.76660706602993	2.38068677366442	84.0685196250491	no	0.0397407500279216	no
WBGene00233216	Bm12955	Bma-mdf-1	0	0	0	0	1.6145738634703	153.549002712914	0	0.538191287823432	51.1830009043046	no	0.0294768652850041	no
WBGene00222777	Bm2516a	Bm2516a	13	3.79775404234112	0	0	2.12797391581321	0.35818462057442	1.8996539977779	2.60846065197741	0.119394873524807	no	3.22358154152959	no
WBGene00225122	Bm4861	Bma-mrps-15	1	9.34496432334166	126.499570366771	0	9.69967009109578	0.8905456010079	4.13268008238185	7.72577149893976	42.4633719892596	no	0.200761494094292	no
WBGene00222151	Bm1890	Bma-erm-1	1	0	8.88293645550595	0	2.82658374370134	0.555071949555051	6.62368042004465	3.150088054582	3.146002801687	no	1.00098534735513	no
WBGene00236701	NA	NA	NA	0	0	0	0	0	0	0	0	no	1	no
WBGene00226191	Bm5930a	Bma-lron-8	0	0	0	0	0.996520421970715	0.335472429042286	0	0.332173473990238	0.111824143014095	no	1.19818721545189	no
WBGene00233217	Bm12956	Bm12956	0	23965.9583213389	2417.01196049489	0	0	1606.93182125626	134.961706578926	8033.64000930593	1341.31459391705	no	5.98566092160243	no
WBGene00222701	Bm2440	Bma-fust-1	1	3.5852965501135	0.906792070782847	0	6.76615136560409	0.512501165419748	5.81367370430898	5.38837387334219	0.473097745400865	no	4.33669380955013	no
WBGene00223179	Bm2918	Bm2918	0	0	1276.54860533866	0	0	466.279622140628	4.43861462942336	1.47953820980779	580.942742493096	no	0.00426079411040546	no
WBGene00234158	Bm13897	Bma-tin-13	0	0	12.1248387188192	0	3.60630540108457	0.607020190503285	2.81694755221671	2.1410843177671	4.24395296977417	no	0.598991702609103	no
WBGene00234194	Bm13933a	Bma-nath-10	1	16.7865519735694	133.052382655971	0	15.4525716247147	0.508892531718685	16.2686262477295	16.1692499486712	44.5204250625633	no	0.377176837102769	no
WBGene00233218	Bm12957a	Bm12957a	0	0	536.182933679996	0	1.00615286893177	0	0	0.335384289643923	178.727644559999	no	0.00743004390289069	no
WBGene00225101	Bm4840a	Bma-nmtn-1	0	9.13095381603764	209.469943311489	0	3.55897692405428	0.133123060255426	2.47109196429993	5.05367423479728	69.8676887905814	no	0.0854222049301802	no
WBGene00233987	Bm13726	Bma-iars-1	0	6.38906735493439	9.77278218130891	0	12.9617176486263	0.811810600962667	6.12186443163063	8.49088314506379	3.52819759409053	no	2.09595163370295	no
WBGene00224576	Bm4315	Bm4315	0	13.947627786045	519.020317885602	0	11.844847912183	7.08887946610733	8.22419170417293	11.3388891341336	175.36973245057	no	0.0699603552304065	no
WBGene00223289	Bm3028a	Bm3028a	5	0	13.1405825046301	0	9.75655965174737	0.469212198380507	3.26615038768888	4.34090334647875	4.53659823433686	no	0.964654309455859	no
WBGene00233219	Bm12958	Bma-aptf-1	0	0	0	0	0	0.136107987630504	1.26324978506894	0.421083261689645	0.0453693292101679	no	1.35940783987163	no
WBGene00222157	Bm1896a	Bma-nhr-23	0	3.181902035475	0	0	7.89568700037257	0.428715182926911	4.77480599441471	5.28413167675409	0.142905060975637	no	5.49838467894233	no
WBGene00223414	Bm3153a	Bma-sin-3	0	15.4097097157584	0	0	4.32508241358826	0.556710551339253	4.37204280685118	8.03561164539927	0.185570183779751	no	7.62132159615601	no
WBGene00223415	Bm3154a	Bm3154a	0	57.1272059091427	0	0	13.6309757719566	13.274695365024	24.3368938184709	31.6983584998567	4.424898455008	no	6.02746001073461	no
WBGene00225968	Bm5707	Bma-cerk-1	0	114.076404256283	238.329694064587	0	126.592626476191	223.89629204834	105.525133035907	115.39805458946	154.075328704309	no	0.750590410234777	no
WBGene00268794	Bm17652	Bm17652	0	72.6337274020247	21.2251394615084	0	9.43682938058532	118.60240645218	14.7425414477276	32.2710327434459	46.6091819712296	no	0.698836471577094	no
WBGene00226396	Bm6135	Bma-dhod-1	1	23.4193397044427	20.4539335071213	0	278.151934450596	246.722523568918	10.6541858069375	104.075153320659	89.0588190253465	no	1.1667391873203	no
WBGene00234926	NA	NA	NA	0	0	0	32.2535764744888	0	0	10.7511921581629	0	no	11.7511921581629	no
WBGene00227612	Bm7351a	Bma-zfh-2	0	6.01015895270412	0.252912972499198	0	9.86463231250518	0.529757415486406	7.26512442544015	7.71330523021648	0.260890129328534	no	6.91043971837309	no
WBGene00268795	Bm17653	Bm17653	0	0	0	0	10.8530991928375	1.8268143173914	0	3.61769973094582	0.608938105797134	no	2.87002944010579	no
WBGene00227370	Bm7109	Bm7109	0	0	612.572364301301	0	24.3160941940712	519.07998876354	17.8764441789643	14.0641794576785	377.217451021614	no	0.039829414050008	no
WBGene00233227	Bm12966	Bm12966	1	0	626.785765165494	0	196.031464798255	11.9986870340727	118.322758078519	104.784740958925	212.928150733189	no	0.494487240675769	no
WBGene00269325	Bm18185	Bm18185	1	100.326835991563	57.0810528209995	0	17.6697834080918	0.297421158155545	27.6043471552101	48.5336555182885	19.1261579930517	no	2.46115803798169	no
WBGene00233228	Bm12967a	Bm12967a	2	0	288.576065157634	0	42.1990896134282	3.07798014287753	24.1724553467245	22.1238483200509	97.2180151001705	no	0.235433879380146	no
WBGene00226512	Bm6251	Bm6251	1	78.5473644395837	67.1433462001282	418.526018181685	60.6949465605172	6.21260814599978	40.3624594650536	59.8682568217182	163.960657509271	no	0.368986507090621	no
WBGene00225939	Bm5678a	Bm5678a	0	50.3140777336315	0.246034773413864	93.6768192050076	41.1224050224683	2.5338737629875	48.1821332163667	46.5395386574888	32.1522425804697	no	1.43397655655111	no
WBGene00233229	Bm12968	Bm12968	0	121.078506314457	0	0	88.4696911915398	7.44569342140359	37.2104958977809	82.2528978012593	2.48189780713453	no	23.9102071378061	no
WBGene00227236	Bm6975	Bma-wwp-1	2	22.1455401356567	5.50156991711029	0	51.7316085831511	2.50741338300736	30.8881380917814	34.9217622701964	2.66966110003922	no	9.78885005751962	no
WBGene00233230	Bm12969	Bm12969	0	83.7635460329992	40.1612619196608	0	54.7015053780146	7.11485663027466	66.0346337159162	68.1665617089767	15.7587061833118	no	4.12720176321559	no
WBGene00222522	Bm2261a	Bma-dhhc-7	5	24.4520525820578	278.781876944186	0	28.3074970706369	0.977389086452199	20.4105930407842	24.3900475644929	93.2530886768796	no	0.269381597154186	no
WBGene00233231	Bm12970	Bm12970	0	0	0	0	76.0517910228721	2.8447071658272	39.6035799776593	38.5517903335105	0.948235721942401	no	20.3013371985999	no
WBGene00225653	Bm5392a	Bma-daf-16	0	21.7662705812901	0	0	31.3470487702406	1.77961248949185	22.0226614077399	25.0453269197569	0.593204163163951	no	16.3477647886843	no
WBGene00233232	Bm12971	Bm12971	0	73.7331989715353	0	0	47.2165758698702	3.97379196875862	64.5429477814602	61.8309075409552	1.32459732291954	no	27.0287274795808	no
WBGene00225726	Bm5465a	Bma-aak-2	0	12.8001339987107	0	0	55.9889607597577	3.26580095229618	36.3727868398062	35.0539605327582	1.08860031743206	no	17.2622594336702	no
WBGene00233905	Bm13644	Bm13644	0	0	647.921489137524	0	2.98566353284055	623.919015298228	2.33215344935803	1.77260566073286	423.946834811918	no	0.00652459421649775	no
WBGene00224594	Bm4333a	Bma-hmbx-1	0	62.7342263950487	1.0366003969073	130.802556978034	13.4577944040585	1.01396527595962	24.0276939026041	33.4065715672371	44.2843742169669	no	0.759789047815655	no
WBGene00221981	Bm1720a	Bma-spe-42	5	23.1700018835071	0	0	42.3784140518129	3.6987042450817	34.3285315136485	33.2923158163228	1.23290141502723	no	15.3577384050807	no
WBGene00223844	Bm3583	Bm3583	0	35.1455543009284	414.209159465457	0	18.2862721658189	1.89414162638617	30.7649431685584	28.0655898784352	138.701100363948	no	0.208055554342191	no
WBGene00228782	Bm8521a	Bm8521a	0	72.6534471210802	57.0737432507953	0	84.606589483916	6.1918009604866	60.5099392464731	72.5899919504898	21.088514737094	no	3.33159530309694	no
WBGene00223843	Bm3582a	Bma-snx-27	0	23.6877426597761	0.90767270890763	0	67.9012793105371	4.1459126092659	39.5191537412728	43.7027252371954	1.68452843939118	no	16.6519842298014	no
WBGene00233233	Bm12972a	Bm12972a	0	155.655844793944	32.3968332993726	0	153.104369702206	20.6166551807993	85.423194635034	131.394469710395	17.6711628267239	no	7.09085293396397	no
WBGene00234042	Bm13781a	Bma-ndk-1	0	382.348242783135	1596.65035809588	0	391.53802820827	1380.67003976606	20.5604792604323	264.815583417279	992.440132620647	no	0.267570812461613	no
WBGene00226461	Bm6200a	Bm6200a	1	256.485301968017	51.9641016412534	0	369.790728473024	37.1192119990966	220.672129642902	282.316053361314	29.6944378801167	yes	9.23020823733154	yes
WBGene00223062	Bm2801a	Bma-lfe-2	0	468.046931070378	3.89756068365862	0	213.090288470929	16.5667246233538	261.242058618888	314.126426053398	6.8214284356708	no	40.2901373636836	no
WBGene00233908	Bm13647	Bm13647	1	903.425722135443	0	0	265.158349753429	32.4596059763862	301.265127689703	489.949733192858	10.8198686587954	yes	41.5359719608672	yes
WBGene00227823	Bm7562	Bma-gopc-1	0	27.4117955151239	48.1863726105331	0	54.0151263871623	2.89742789220269	46.3649998874446	42.5973072632436	17.0279335009119	no	2.41831972927115	no
WBGene00234700	Bm14439	Bm14439	0	534.737966373004	0	0	128.411435309647	7.20481908354366	66.86959609935	243.339665927333	2.40160636118122	no	71.8306705666218	no
WBGene00232797	Bm12536	Bm12536	0	79.3805270011995	1.45980617734411	0	68.5411196819944	4.88241751087391	63.1051226841117	70.3422564557685	2.11407456273934	no	22.9096172934958	no
WBGene00223653	Bm3392a	Bm3392a	0	28.0367728253839	0	0	6.07106025898384	1.22627090446316	13.2781886210003	15.795340568456	0.408756968154386	no	11.9220993742161	no
WBGene00221317	Bm1056	Bm1056	insdc=CTP8	283.098609733497	5.28323877942851	0	205.364142594757	11.0876192157072	254.240241007173	247.567664445142	5.45695266504524	yes	38.4961261665685	yes
WBGene00225650	Bm5389a	Bm5389a	0	58.3044096250367	0	0	72.999806493105	4.91498656002022	53.6001273164857	61.6347811448758	1.63832885334007	no	23.7403237528867	no
WBGene00233497	Bm13236	Bm13236	1	23.546075062515	0	0	81.0454065651146	6.34498470731829	53.0003465380033	52.5306093885443	2.11499490243943	no	17.1848144427534	no
WBGene00222749	Bm2488a	Bm2488a	1	40.2211967961552	0.444981551915984	0	59.1011598498752	4.58279560961375	48.7584745227825	49.360277056271	1.67592572050991	no	18.819758960527	no
WBGene00225631	Bm5370	Bm5370	0	45.7812584837004	0	0	29.740310775178	2.66983772100146	34.0716513458593	36.5310735349126	0.889945907000487	no	19.8582792215877	no
WBGene00222954	Bm2693	Bma-eif-3.H	0	286.558118717619	1.35815316165387	0	364.567828736871	25.8201411175799	222.525378407167	291.217108620552	9.05943142641127	no	29.0490681067053	no
WBGene00268796	Bm17654	Bm17654	0	329.766677350506	2.94010745634863	0	276.008006591482	28.6734160608261	212.225963891581	272.66688261119	10.5378411723916	no	23.7190717502713	no
WBGene00225808	Bm5547	Bma-pde-1	0	372.138667952683	5.16741284278677	486.581154596404	507.777261111486	23.7550520522585	390.302364574053	423.406097879407	171.834539830483	no	2.45556298119384	no
WBGene00223867	Bm3606a	Bm3606a	2	210.942227739536	0	0	319.809049498796	10.9822172251961	238.947148509144	256.566141915826	3.66073907506535	yes	55.2629395826485	yes
WBGene00222601	Bm2340a	Bm2340a	0	108.720259839399	7699.05429272084	0	146.658023515754	7093.04104978323	105.010693274096	120.129658876416	4930.69844750136	no	0.0245614487921067	no
WBGene00233234	Bm12973	Bm12973	0	331.149278851705	211.698479785303	0	284.10629277505	29.234160579154	267.979280248331	294.411617291696	80.3108801214856	no	3.63311302067232	no
WBGene00222099	Bm1838a	Bm1838a	0	675.735770249607	131.295043684011	0	831.546724406834	44.8162512161627	457.456706171633	654.913066942691	58.7037649667246	no	10.9861257042711	no
WBGene00222997	Bm2736	Bma-arch-1	0	235.010460216329	0	0	135.703936574145	9.13677797853834	328.602148535621	233.105515108698	3.04559265951278	no	57.8668034109228	no
WBGene00222998	Bm2737a	Bma-mafr-1	0	721.127340932128	4.41016118452295	1100.30568998424	512.124230980289	41.9212601901951	576.041901991435	603.097824634617	382.212370452987	no	1.57640481156839	no
WBGene00233235	Bm12974a	Bm12974a	0	358.24113530397	4.08813768471502	1154.85881347053	462.451790116678	27.6823603924789	371.246868148343	397.313264522997	395.543103849242	no	1.00446398047671	no
WBGene00232345	Bm12084	Bma-cutl-14	2	61.2991533540849	0.3697190415088	0	63.4502956063609	5.85082344803853	53.0099237600015	59.2531242401491	2.07351416318244	no	19.6039845730727	no
WBGene00233236	Bm12975	Bma-cpl-1.3	0	0	1.40395419003698	0	15.4451703890875	0.866586827719393	11.2601905302188	8.90178697310209	0.756847005918792	no	5.63611227371713	no
WBGene00268797	Bm17655	Bm17655	0	0	0	0	0	0.252428173522977	2.34284439509838	0.78094813169946	0.084142724507659	no	1.64272479207776	no
WBGene00226945	Bm6684	Bm6684	0	227.155602748716	2.34790742594114	0	172.814100116819	10.2320999119723	176.366340868782	192.112014578106	4.19333577930449	no	37.1845809292092	no
WBGene00226254	Bm5993	Bm5993	0	106.34612893277	5.5312293202147	0	127.907660146187	6.99713977822309	99.1972374611642	111.150342180041	4.1761230328126	no	21.6668617552355	no
WBGene00268798	Bm17656	Bm17656	1	47.8732027464728	10.4499274996875	219.874803417681	46.9678103934648	4.46056185711347	48.4677174098591	47.7695768499322	78.2617642581606	no	0.615297644537492	no
WBGene00231979	Bm11718	Bm11718	1	60.1721692780392	0.67944600557986	0	32.8887519006538	3.73253683671996	61.8894809290742	51.6501340359224	1.47066094743327	no	21.3101413573642	no
WBGene00268799	Bm17657	Bm17657	1	46.0589509035629	0.459581118434243	0	35.7286453557555	3.57430714175507	19.4831270942984	33.7569077845389	1.3446294200631	no	14.8240517188441	no
WBGene00225771	Bm5510a	Bma-guk-1	0	801.920452180134	14.82054967614	2230.00886023524	1046.67164343596	114.938520088736	1469.58379767291	1106.05863109633	786.589310000038	no	1.40562932614751	no
WBGene00225770	Bm5509	Bma-tfbm-1	0	105.040432158669	0	0	188.331670022075	7.19766292632918	119.392914132093	137.588338770946	2.39922097544306	no	40.7706176715628	no
WBGene00223696	Bm3435a	Bm3435a	0	692.44531514502	13.87856072802	1751.25461635559	433.290365115322	42.0263116905768	584.413712481618	570.049797580653	602.386496258061	no	0.946407984139609	no
WBGene00221841	Bm1580a	Bm1580a	0	125.320189202566	11.6666975007683	93.5942845625363	144.718710494544	344.627386990229	82.8117148650461	117.616871520719	149.962789684511	no	0.785735821182224	no
WBGene00231870	Bm11609	Bm11609	0	41.0191869419649	1.62964202434355	0	45.8160145988519	3.82238966514725	32.3645122387599	39.7332379265256	1.81734389649694	no	14.4580283497421	no
WBGene00228694	Bm8433a	Bma-gon-2	8	124.530552830256	2.85498053023411	98.1994741596929	153.956312765323	9.44249378651492	104.624407763158	127.703757786246	36.832316158814	yes	3.40195290306753	no
WBGene00227231	Bm6970	Bm6970	1	8.37594702180801	0	0	7.98037168591026	0.854809043810265	3.96684044657161	6.77438638476329	0.284936347936755	no	6.05040584091715	no
WBGene00235517	NA	NA	NA	0	0	0	0	0	92.9226854887071	30.9742284962357	0	no	31.9742284962357	no
WBGene00227232	Bm6971	Bma-vps-20	0	0	220.596653961368	0	34.0099593518124	3.43477266210522	20.0719134166201	18.0272909228108	74.6771422078244	no	0.251427186171462	no
WBGene00229307	Bm9046	Bm9046	2	721.359036125915	5.36493834818255	669.258100093508	1034.17416870535	45.4778414202375	648.502951518482	801.345385449916	240.033626620643	yes	3.32876950282422	no
WBGene00221095	Bm834	Bm834	0	38.1018591119122	0.596856819051837	0	18.2594634611507	2.32384139441018	19.4808741650771	25.2807322460466	0.973566071154007	no	13.316368086263	no
WBGene00229152	Bm8891	Bma-snrp-27	0	13.0829500526783	178.552521574407	0	8.64152426297624	2.90911562995914	13.5000882691141	11.7415208615895	60.4872124014553	no	0.207222288406881	no
WBGene00223969	Bm3708	Bma-usp-48	0	119.151329401679	1.65911265263363	209.958609785871	131.874271757296	10.8389451049753	186.09163988604	145.705747015005	74.1522225144933	no	1.95211454972888	no
WBGene00222101	Bm1840	Bma-mrps-30	0	53.8736179657556	0	0	55.3108460189908	3.97379196875862	65.3332695910291	58.1725778585918	1.32459732291954	no	25.4549797830254	no
WBGene00221964	Bm1703	Bma-rpn-10	1	33.3907497290874	78.5744716990236	0	35.8731997203418	5.54330713258778	26.6430863759994	31.9690119418095	28.0392596105371	no	1.1353255001669	no
WBGene00224189	Bm3928	Bma-uev-1	0	0	0	0	19.7603407163934	2.95653170446471	10.2900960440515	10.0168122534816	0.985510568154902	no	5.54860418784844	no
WBGene00229151	Bm8890	Bm8890	0	68.8174262913847	1.70742184121525	0	110.593200236755	6.25812092383203	105.829324316562	95.0799836149006	2.65518092168242	no	26.2859720691135	no
WBGene00225136	Bm4875	Bm4875	0	90.2188563112204	0	0	12.7695386413868	0	13.2993434621384	38.7625794715819	0	no	39.7625794715819	no
WBGene00225630	Bm5369a	Bma-mrps-6	0	24.285637691813	10.5117689001813	0	23.3277140545539	1.30885507969299	15.1847342585536	20.9326953349735	3.94020799329143	no	4.43962994366979	no
WBGene00229150	Bm8889a	Bm8889a	1	0	0	0	5.7719065650629	1.33586516404078	9.01707218983043	4.92965958496444	0.445288388013594	no	4.10275183426484	no
WBGene00235482	NA	NA	NA	0	0	0	44.9020378370334	0	70.1475174767691	38.3498517712675	0	no	39.3498517712675	no
WBGene00231817	Bm11556	Bm11556	5	3.74461847673481	85.0235206783528	0	8.12684622478633	0.475800427057042	4.96801581882997	5.61316017345037	28.4997737018033	no	0.224176640821015	no
WBGene00227492	Bm7231	Bma-slc-30A5	15	22.2391785568515	0	0	15.4100923349303	1.89135339042977	13.541726001053	17.0636656309449	0.630451130143255	no	11.0789371708171	no
WBGene00222784	Bm2523a	Bma-lin-35	0	49.1392283279692	0	0	57.4002733760503	5.3925897425066	47.9644640048092	51.5013219029429	1.79752991416887	no	18.7670278830748	no
WBGene00222061	Bm1800	Bma-cpb-3	0	37.3212162341992	0	0	40.6239485234791	3.45736534654801	26.3839676058727	34.776377454517	1.152455115516	no	16.6211955810936	no
WBGene00222060	Bm1799a	Bma-rnt-1	0	0	0	0	1.94315140406339	0.32707494354653	4.55348755788955	2.16554632065098	0.109024981182177	no	2.85435078051771	no
WBGene00224054	Bm3793	Bma-ceh-12	0	0	0	0	6.97867980314363	0.839046192794049	4.67242933127805	3.88370304480723	0.279682064264683	no	3.81634093435032	no
WBGene00224504	Bm4243	Bm4243	0	15.2332441051258	1.63709867958814	153.824082506847	18.3887632081894	1.64909881939203	15.5411402505631	16.3877158546261	52.3700933352758	no	0.325795117977308	no
WBGene00225311	Bm5050a	Bm5050a	1	0	0	0	4.81979253815039	1.52114372916174	5.64723502970043	3.48900918928361	0.507047909720581	no	2.97867716104388	no
WBGene00268800	Bm17658	Bma-inx-12	4	11.7083359988454	0	0	15.2921798309763	0.702002405772505	7.05840098453452	11.3529722714521	0.234000801924168	no	10.0105058701665	no
WBGene00228949	Bm8688	Bma-inx-13	5	38.5456207303705	2.10749374322029	401.210177772795	45.9966454546916	8.33780007590864	46.6767000411944	43.7396554087521	137.218490530641	no	0.323687917853754	no
WBGene00228948	Bm8687	Bm8687	0	9.80414023336384	0	0	15.6957089080788	0.792579481088936	12.260189826303	12.5866796559152	0.264193160362979	no	10.747313054608	no
WBGene00223695	Bm3434	Bma-rme-8	2	16.4941906936753	0.157402695843909	0	43.2209173312875	2.649058775768	27.5222334956038	29.0791138401889	0.935487157203971	no	15.5408490974652	no
WBGene00233752	Bm13491	Bm13491	0	15.5819482723475	0	0	5.08786976905186	0.700690848056206	5.05810214890054	8.57597339676662	0.233563616018735	no	7.76285330761667	no
WBGene00230436	Bm10175	Bm10175	0	259.838751528535	3.57253331652431	0	469.005381480867	33.5180713886597	409.327619143618	379.390584051007	12.363534901728	no	28.4648176435578	no
WBGene00268801	Bm17659	Bm17659	0	78.8112429778394	0	0	31.5427538524615	5.30933637699154	29.5663090191341	46.6401019498117	1.76977879233051	no	17.1999663228437	no
WBGene00221641	Bm1380	Bm1380	1	0	0	0	7.422101991013	0.864901617732803	8.91928045703123	5.44712748268141	0.288300539244268	no	5.00436605146759	no
WBGene00220777	Bm516	Bm516	0	0	0	0	31.1262670054775	3.74230894145229	6.94664736177714	12.6909714557516	1.24743631381743	no	6.09181731717081	no
WBGene00230435	Bm10174	Bm10174	0	0	0	0	0	0	5.54654789351198	1.84884929783733	0	no	2.84884929783733	no
WBGene00230434	Bm10173	Bm10173	0	0	0	0	7.22398715990127	0	5.64278137431423	4.2889228447385	0	no	5.2889228447385	no
WBGene00230433	Bm10172	Bm10172	1	0	0	0	0	0	0	0	0	no	1	no
WBGene00233751	Bm13490	Bm13490	0	0	0	0	18.4083917177548	1.23941421533629	11.5032906473158	9.9705607883569	0.413138071778763	no	7.7632617841425	no
WBGene00230431	Bm10170	Bm10170	1	0	0	0	4.71679491182019	0.396969949505238	0	1.57226497060673	0.132323316501746	no	2.27167005493944	no
WBGene00230430	Bm10169	Bm10169	0	0	0	0	17.0641127398562	2.87226394165116	15.9948884857611	11.0196670752058	0.957421313883721	no	6.14056207008267	no
WBGene00221640	Bm1379	Bm1379	0	0	0	0	0	0	0	0	0	no	1	no
WBGene00233749	Bm13488	Bm13488	0	225.533003498441	0	0	107.983925139793	3.13380342251696	81.4395568754685	138.318828504567	1.04460114083899	no	68.1398565821981	no
WBGene00230429	Bm10168	Bm10168	1	0	0	0	11.2145148368693	2.26517818395447	3.50394063791893	4.9061518249294	0.755059394651491	no	3.36521478585185	no
WBGene00234862	NA	NA	NA	652.806833934247	38.5480755387932	0	932.96456394725	42.8286467743985	441.669554483361	675.813650788286	27.1255741043972	NA	24.0639941526552	NA
WBGene00221335	Bm1074	Bm1074	11	5.2146266325136	0.665173171702492	0	9.84101387919512	0.9110520048701	9.22438347567312	8.09334132912728	0.525408392190864	no	5.96125036133241	no
WBGene00226355	Bm6094	Bm6094	1	0	0	0	20.4693088687258	1.43559709858319	15.9889313578334	12.1527467421864	0.478532366194396	no	8.89581252525459	no
WBGene00233757	Bm13496	Bm13496	0	0	0	0	0	0	0	0	0	no	1	no
WBGene00268802	Bm17660	Bm17660	0	0	0	0	0.426761820665058	0.0718333620890022	1.33340417119464	0.586721997286567	0.0239444540296674	no	1.54961725808673	no
WBGene00268803	Bm17661	Bm17661	0	0	0	0	0	0	0	0	0	no	1	no
WBGene00268804	Bm17662	Bm17662	0	0	0	0	23.3832940403884	3.01753910221255	21.9181147187454	15.1004695863779	1.00584636740418	no	8.026771066826	no
WBGene00223401	Bm3140	Bma-daf-8.2	0	10.5242291186983	0	0	13.4063543151767	1.17008011569259	14.7382793657826	12.8896209332192	0.390026705230862	no	9.99234106866483	no
WBGene00223922	Bm3661	Bm3661	11	92.9847952204115	52.4828011102865	684.949966449745	50.3371321004258	4.0669641133954	33.552388195219	58.9581051720187	247.166577224476	no	0.241604271786303	no
WBGene00228573	Bm8312	Bma-aex-6	0	0	0.915584058342645	0	19.81208650387	1.83989413350638	8.53824198404588	9.45010949597198	0.918492730616341	no	5.44704148689411	no
WBGene00230531	Bm10270	Bma-uri-1	1	5.70093313312621	224.512380149693	0	3.76556906455742	0.362187287732756	5.04231626682907	4.83627282150423	74.9581891458087	no	0.0768353338479538	no
WBGene00223065	Bm2804	Bm2804	0	5.21799018441589	0	0	5.41604885542372	0.580134325260611	4.61516670563134	5.08306858182365	0.193378108420204	no	5.09735224645308	no
WBGene00224462	Bm4201c	Bm4201c	0	10.7067669165253	0	0	5.99926179184915	0	4.01668045432099	6.90756972089849	0	no	7.90756972089849	no
WBGene00230532	Bm10271	Bm10271	1	44.2494922197485	435.010119529599	0	30.5146075091771	3.4768643137888	41.0703792360911	38.6114929883389	146.162327947796	no	0.269168703300145	no
WBGene00225259	Bm4998	Bm4998	0	0	0	0	7.57026092459076	0.891968511334579	10.6438712468883	6.07137739049301	0.297322837111526	no	5.4507460966596	no
WBGene00230533	Bm10272	Bm10272	1	93.0939323040035	27.0161774961668	0	44.3486676524221	2.03586877272669	31.4922833742537	56.3116277768931	9.68401542296449	no	5.36424045716988	no
WBGene00225147	Bm4886	Bma-crml-1	0	10.1749176861504	0	0	15.4036138768298	98.9318015835946	13.6834843508496	13.0873386379433	32.9772671945315	no	0.414610703011764	no
WBGene00226375	Bm6114	Bma-vps-25	0	382.670020884888	1.71934888715101	1309.27130841822	577.311915047572	30.0160432015532	414.872460505463	458.284798812641	447.00223350231	no	1.02518417201211	no
WBGene00226374	Bm6113	Bm6113	0	127.954878520687	1.85664716489083	0	92.8192760369892	8.16153885900515	54.1065243695588	91.6268929757451	3.33939534129866	no	21.345575982488	no
WBGene00235531	NA	NA	NA	807.813883731856	16.3476131866086	0	1582.62051685293	74.6698396642654	1442.24764990195	1277.56068349558	30.3391509502913	NA	40.7975533709758	NA
WBGene00223777	Bm3516	Bm3516	0	130.850244828236	1.4154098452594	0	129.759968817356	11.1828198286734	72.9775850449615	111.195932896851	4.19940989131093	no	21.5785897327212	no
WBGene00223478	Bm3217	Bma-pes-7	0	7.6601613906602	0	0	4.45211085658815	0.431465688607408	2.10764898746037	4.7399737449029	0.143821896202469	no	5.01824083273788	no
WBGene00226274	Bm6013	Bma-gpdh-3	2	84.0257620368	0	0	74.5535815208817	4.97437868387206	58.7597330733693	72.446358877017	1.65812622795735	no	27.6308770082213	no
WBGene00229382	Bm9121	Bm9121	2	26.9020897000089	0.362942475722684	0	73.7337078372394	6.18309651212401	56.1392139750733	52.2583371707739	2.1820129959489	no	16.73730975913	no
WBGene00226950	Bm6689	Bm6689	0	100.52728811535	0	0	65.3042945728718	10.2593336379738	71.4144403209313	79.0820076697176	3.41977787932459	no	18.1190118273444	no
WBGene00229381	Bm9120	Bm9120	1	46.8300304142144	0.552681030715747	0	28.4549380782497	3.54013125687896	27.0585237592724	34.1144974172455	1.36427076253157	no	14.8521472133108	no
WBGene00228093	Bm7832	Bm7832	10	18.4478900571201	0.82937008021808	0	21.8192716363928	1.3729575101321	20.0698106547515	20.1123241160881	0.734109196783392	no	12.1747374128743	no
WBGene00228700	Bm8439	Bma-col-45	1	26.3837981861807	1.06785024577368	0	100.246410054772	4.87754424619517	77.0807023436591	67.9036368615373	1.98179816398962	no	23.1080821276464	no
WBGene00226946	Bm6685a	Bm6685a	0	325.968216630398	5.69561405531182	0	933.477917654685	70.8025155359924	576.169556706557	611.871896997213	25.4993765304347	no	23.1277855270793	no
WBGene00235523	NA	NA	NA	4747.8776112842	37.6378837824121	21310.4798072328	17449.9691541933	1469.19181609684	10395.4783042473	10864.4416899082	7605.76983570402	NA	1.42839101544902	no
WBGene00228574	Bm8313	Bma-nrd-1	0	656.897787654517	7.40054562357368	1165.61061622271	1864.44010714406	135.265896675412	1105.19600427963	1208.84463302607	436.092352840565	no	2.76793822898882	no
WBGene00228575	Bm8314	Bm8314	0	0	0	0	3.81349530339501	0.320947394645784	0	1.27116510113167	0.106982464881928	no	2.05167215668038	no
WBGene00228762	Bm8501	Bm8501	1	17.1401470173984	0	757.552442634208	31.1767147639953	2.24902456319369	30.1509264746178	26.1559294186705	253.267155732467	no	0.106800775508903	no
WBGene00221386	Bm1125	Bm1125	0	0	0	0	5.45239030878263	1.83551343318851	8.51791283646482	4.65676771508248	0.611837811062835	no	3.50951421802945	no
WBGene00231793	Bm11532	Bma-kri-1	0	0	0	0	0.504184044405263	0	1.18148064442379	0.561888229609683	0	no	1.56188822960968	no
WBGene00233061	Bm12800	Bm12800	1	0	56.0795109843029	0	5.19668062713019	0.29157172539303	10.8245790962639	5.34041990779804	18.790360903232	no	0.320379195649867	no
WBGene00234154	Bm13893	Bma-rpl-24.1	0	0	1381.29276442985	0	1.31609421246477	109.434576758032	2.05604792604323	1.12404737950267	496.909113729295	no	0.00426593392435367	no
WBGene00233060	Bm12799	Bm12799	1	0	0	0	0.89698547970572	0.301964607105042	0	0.298995159901907	0.100654869035014	no	1.18020207464378	no
WBGene00233059	Bm12798a	Bm12798a	0	0	0	0	0.929007679386898	0	1.45132794779522	0.793445209060707	0	no	1.79344520906071	no
WBGene00233058	Bm12797a	Bm12797a	1	0	39.1769410441939	0	3.94261795642245	0.442419306708277	4.10619614498161	2.68293803380135	13.2064534503007	no	0.259244015171386	no
WBGene00233057	Bm12796	Bma-nars-1.6	0	9.13297335105863	0	0	5.69315526500092	0.501957621719598	3.38820730798174	6.07144530801377	0.167319207239866	no	6.05785055549137	no
WBGene00223778	Bm3517	Bma-nars-1.4	0	6.10845012527518	0	0	3.45834975538188	0.194038671517536	3.60183578284946	4.38954522116884	0.0646795571725121	no	5.06212896158347	no
WBGene00220360	Bm99	Bm99	3	0	0	0	0	0	0	0	0	no	1	no
WBGene00221009	Bm748	Bm748	1	0	0	0	0.673926995199736	0	0	0.224642331733245	0	no	1.22464233173325	no
WBGene00221010	Bm749	Bma-nars-1.7	0	0	0	0	0	0	0	0	0	no	1	no
WBGene00228433	Bm8172a	Bm8172a	0	0	0	0	0	0	0	0	0	no	1	no
WBGene00228468	Bm8207	Bm8207	1	0	0	0	0	0	0	0	0	no	1	no
WBGene00233471	Bm13210	Bm13210	0	0	8.97322969104421	0	7.97910776895019	0.447686203216709	6.2326191486328	4.73724230586099	3.14030529808697	no	1.38570513351078	no
WBGene00226352	Bm6091a	Bma-plin-1	1	0	28.5625503608493	0	2.38152243467849	0.515394501370714	2.65749769077048	1.67967337514966	9.69264828740668	no	0.250608951414371	no
WBGene00226353	Bm6092a	Bm6092a	1	0	0	0	0	0.194577395744365	0	0	0.0648591319147882	no	0.939091350235067	no
WBGene00226524	Bm6263	Bm6263	2	0	76.4866650207374	0	3.90785653530496	0	3.05249436119047	2.32011696549847	25.4955550069125	no	0.125308451347114	no
WBGene00226520	Bm6259a	Bma-maea-1	0	0	0	0	6.87501179764622	38.3985001784659	9.76398305489963	5.54633161751528	12.7995000594886	no	0.474389042305484	no
WBGene00228666	Bm8405	Bm8405	0	0	0	0	1.11991584980864	0.150805094276051	1.04974277914179	0.723219542983477	0.0502683647586836	no	1.64074211963855	no
WBGene00225602	Bm5341	Bma-suro-1	0	0	0	0	1.59346189766979	0.0670536350299358	0.9335104961247	0.842324131264832	0.0223512116766453	no	1.80204621486528	no
WBGene00231819	Bm11558	Bma-cutl-8	0	0	0	0	0.529113662127704	0	0	0.176371220709235	0	no	1.17637122070923	no
WBGene00268805	Bm17663	Bm17663	0	0	129.062921210342	0	2.96057392332088	0	0	0.986857974440294	43.0209737367808	no	0.0451343486021123	no
WBGene00228038	Bm7777	Bma-rpap-3	0	0	0	0	2.01348528401703	0.451884901488378	2.09702426220119	1.37016984873941	0.150628300496126	no	2.05989184145518	no
WBGene00222805	Bm2544	Bma-sec-10	0	4.65366679726142	0	0	3.51294946069216	0.147826585223235	5.48805122349411	4.55155582714923	0.0492755284077451	no	5.2908465668437	no
WBGene00222779	Bm2518a	Bma-ubr-1	0	1.61238128844929	2.09971842435869	0	2.83943450674359	0.434490019691806	2.21793142672984	2.22324907397424	0.844736148016831	no	1.74726834373543	no
WBGene00226294	Bm6033	Bma-trak-1	0	0	13.5991095283295	0	1.00799820835832	0.0848340886881929	0.787364842927568	0.598454350428628	4.56131453900591	no	0.287423834637908	no
WBGene00268806	Bm17664	Bm17664	1	0	0	0	0	0	0	0	0	no	1	no
WBGene00222941	Bm2680a	Bma-acr-11	4	0	0	0	0	0	0	0	0	no	1	no
WBGene00268807	Bm17665	Bm17665	0	0	0	0	0.933552356171506	0.157137309812306	1.45842779915011	0.797326718440539	0.0523791032707686	no	1.70787001837502	no
WBGene00226220	Bm5959	Bm5959	0	0	0	0	2.2487763630331	0	0	0.749592121011032	0	no	1.74959212101103	no
WBGene00230106	Bm9845	Bm9845	0	0	0	0	0	0.607977635598716	0	0	0.202659211866239	no	0.831490741627663	no
WBGene00230105	Bm9844	Bm9844	0	0	0	0	0	0	0	0	0	no	1	no
WBGene00221112	Bm851	Bm851	0	0	0	0	11.3086613811788	1.42762155914662	4.41669554483361	5.24178564200413	0.475873853048872	no	4.22921351246233	no
WBGene00230103	Bm9842	Bm9842	0	0	0	0	0	0	0	0	0	no	1	no
WBGene00230102	Bm9841	Bm9841	0	4.76331688327601	0	0	4.19414639137125	0.51343033096182	2.97829120156113	3.97858482540279	0.17114344365394	no	4.25104614842886	no
WBGene00220277	Bm16	Bm16	0	0	0	0	0	0	0	0	0	no	1	no
WBGene00220722	Bm461	Bm461	0	0	0	0	0	0	0	0	0	no	1	no
WBGene00220721	Bm460	Bm460	0	0	0	0	0	0	0	0	0	no	1	no
WBGene00230154	Bm9893	Bm9893	0	0	0	0	6.10667714583654	0	0	2.03555904861218	0	no	3.03555904861218	no
WBGene00220720	Bm459	Bm459	0	0	0	0	0	0	0	0	0	no	1	no
WBGene00230153	Bm9892	Bm9892	1	16.7644191039881	20.8383920635106	0	4.02579067627665	34.7849425310965	2.09640983962217	7.62887320662897	18.5411115315357	no	0.441575352185242	no
WBGene00222473	Bm2212a	Bma-cdf-1	7	0	0	0	0.638951989310464	0.215099230451778	1.99638582104644	0.878445936785636	0.071699743483926	no	1.75277259158345	no
WBGene00231917	Bm11656	Bm11656	0	0	0	0	0.754780464630423	175.831781220141	0	0.251593488210141	58.6105937400469	no	0.0209961587309155	no
WBGene00225955	Bm5694	Bma-tin-44	1	0	0	0	0	0.0728929313482576	0	0	0.0242976437827525	no	0.976278727252539	no
WBGene00226889	Bm6628	Bma-dhhc-2	4	0	145.437369855994	0	2.38108024922142	0	4.64975746206814	2.34361257042985	48.4791232853314	no	0.0675762290925858	no
WBGene00228516	Bm8255a	Bm8255a	1	0	178.803512039959	0	0	0	0	0	59.6011706799864	no	0.0165013313897953	no
WBGene00226940	Bm6679a	Bma-grh-1	0	0	0	0	0.776930934584802	258.541174574002	0.910311295500057	0.562414076694953	86.1803915246674	no	0.0179216226191514	no
WBGene00268808	Bm17666	Bm17666	0	0	2.76929056671831	0	0	0	0.638957562299558	0.212985854099853	0.923096855572771	no	0.630746106512966	no
WBGene00236652	NA	NA	NA	0	0	0	0	0	0	0	0	no	1	no
WBGene00236653	NA	NA	NA	0	0	0	82.2755902882169	6.92439199346562	42.8445915127572	41.7067272669914	2.30813066448854	no	12.9096252833756	no
WBGene00268809	Bm17667	Bm17667	0	0	0	0	1.54312933267433	0	1.20536502402804	0.916164785567456	0	no	1.91616478556746	no
WBGene00221342	Bm1081	Bm1081	2	3.28116540898678	0	0	0.26264524941951	0.0442089483850884	0.820626996516854	1.45481255164105	0.0147363161283628	no	2.41916300089384	no
WBGene00255691	NA	NA	NA	0	0	0	0	0	0	0	0	no	1	no
WBGene00228445	Bm8184	Bma-frm-1	0	0	241.17684270237	0	3.61536321874069	766.960100611677	15.1470312226479	6.25413148046286	336.045647771349	no	0.0215226973806944	no
WBGene00225601	Bm5340	Bm5340	0	0	0	0	0.452480523550426	0	0	0.150826841183475	0	no	1.15082684118348	no
WBGene00230034	Bm9773	Bm9773	0	0	0	0	0	0.139506992750484	0	0	0.0465023309168279	no	0.95556404458642	no
WBGene00227007	Bm6746	Bma-hsf-1	0	0	0	0	1.44343140856521	0.12148056128887	0	0.48114380285507	0.0404935204296235	no	1.42350122684426	no
WBGene00230033	Bm9772a	Bm9772a	0	0	203.103967394219	0	4.73141307786922	389.240723138193	3.69578862739176	2.80906723508699	197.448230177471	no	0.0191942615546663	no
WBGene00227449	Bm7188	Bm7188	0	0	0	0	0	0	0	0	0	no	1	no
WBGene00227448	Bm7187	Bm7187	1	5.79624369422457	45.1840192776002	0	4.37545532302594	0.276181863603716	0.854435966399624	3.67537832788338	15.1534003804013	no	0.289436169337816	no
WBGene00227450	Bm7189	Bm7189	0	220.319062561551	6.50429922567536	0	9.58160640037114	0.604797836249351	7.48435855923687	79.128342507053	2.36969902064157	no	23.7790799760499	no
WBGene00227062	Bm6801b	Bm6801b	2	0	0	0	0	0	0	0	0	no	1	no
WBGene00226884	Bm6623	Bm6623	0	8.45904234209216	0	0	1.35423059118197	0.113973335591244	0	3.27109097775804	0.0379911118637479	no	4.11476642616829	no
WBGene00223259	Bm2998	Bma-rps-10	0	8179.82956187284	3471.27885374799	0	0	293.437664938937	0	2726.60985395761	1254.90550622898	no	2.17182729148758	no
WBGene00222901	Bm2640	Bm2640	0	0	0	0	2.10671934653975	0	1.64559493620756	1.25077142758243	0	no	2.25077142758243	no
WBGene00234198	Bm13937a	Bma-ran-4	0	0	82.601166448375	0	0	0.321751102645731	0	0	27.6409725170069	no	0.0349150155221232	no
WBGene00225483	Bm5222	Bma-tmem-208	2	0	0	0	0	0	2.13328765135076	0.711095883783587	0	no	1.71109588378359	no
WBGene00225486	Bm5225	Bm5225	1	0	0	0	4.04696478359529	0.194626519045487	0.903186920301748	1.65005056796568	0.0648755063484955	no	2.48860129861829	no
WBGene00225484	Bm5223	Bma-paxt-1	1	0	3.97419701142416	0	3.88630280812678	0	1.51782918596318	1.80137733136332	1.32473233714139	no	1.20503220375385	no
WBGene00226659	Bm6398a	Bm6398a	1	0	0	0	1.12021716017547	0.0942785424898095	0.437510504013113	0.519242554729528	0.0314261808299365	no	1.47295325925028	no
WBGene00226658	Bm6397	Bma-npp-13	3	0	0	0	0.774303949176231	0.0651661573913079	0.604822213240106	0.459708720805446	0.0217220524637693	no	1.42867496819269	no
WBGene00235453	NA	NA	NA	0	0	0	0	0	30.3179948416544	10.1059982805515	0	no	11.1059982805515	no
WBGene00230032	Bm9771	Bm9771	0	2.70044187284838	0.874123999034485	0	4.9716906157108	0.181922701986778	4.72770695473033	4.13327981442984	0.352015567007088	no	3.7967608803449	no
WBGene00227014	Bm6753	Bma-nfyc-1	0	0	45.9313859728643	0	0	0	0	0	15.3104619909548	no	0.0613103418256679	no
WBGene00230030	Bm9769	Bm9769	0	0	21.3343175405097	0	2.99800693613211	207.004634233925	1.72553322808562	1.57451338807258	76.1129839248116	no	0.033386250369754	no
WBGene00226224	Bm5963	Bm5963	0	0	0	0	0	0.222679272657184	2.06673794992214	0.688912649974047	0.0742264242190615	no	1.57221290772273	no
WBGene00230029	Bm9768	Bm9768	4	0	0	0	4.59148657581695	0.869453731510345	1.7932448076768	2.12824379449792	0.289817910503448	no	2.4253375372008	no
WBGene00230028	Bm9767	Bm9767	3	0	0	0	2.18772766151297	0.0920606212012386	0	0.729242553837657	0.0306868737337462	no	1.67775742362308	no
WBGene00268810	Bm17668	Bm17668	2	0	0	0	3.9670921259224	0.166937124716148	3.09876430603311	2.3552854773185	0.055645708238716	no	3.1784200429485	no
WBGene00226166	Bm5905	Bma-set-18	0	0	1.34152271477648	0	0.983889980532204	0	0	0.327963326844068	0.447174238258825	no	0.917625045925233	no
WBGene00224529	Bm4268	Bma-ztf-11	0	0	0	0	1.12919325921534	0.0380135918115963	0.352812957723395	0.494002072312911	0.0126711972705321	no	1.47530815168805	no
WBGene00222150	Bm1889a	Bma-cln-3.2	9	0	0	0	5.44296526071213	0.583017447447516	2.31905146368748	2.5873389081332	0.194339149149172	no	3.00361828605281	no
WBGene00230456	Bm10195	Bm10195	1	0	0	0	0	0	0	0	0	no	1	no
WBGene00235571	NA	NA	NA	0	0	0	0	0	0	0	0	no	1	no
WBGene00235568	NA	NA	NA	0	0	0	0	0	51.848165091525	17.282721697175	0	no	18.282721697175	no
WBGene00228339	Bm8078	Bm8078	0	0	0	0	0	0	0	0	0	no	1	no
WBGene00269282	Bm18142	Bm18142	0	0	0	0	3.02111336370541	0	0	1.0070377879018	0	no	2.0070377879018	no
WBGene00269283	Bm18143	Bm18143	0	0	0	0	0	0	0	0	0	no	1	no
WBGene00268811	Bm17669	Bm17669	0	0	0	0	0	0	0	0	0	no	1	no
WBGene00228340	Bm8079	Bm8079	0	0	0	0	0.43785925997872	0.147402608401371	2.05211666805845	0.829991976012389	0.0491342028004571	no	1.74428778618368	no
WBGene00232070	Bm11809	Bma-oct-1	12	0	0	0	0	0	0	0	0	no	1	no
WBGene00227495	Bm7234	Bma-lev-10	1	0	0	0	1.9277286402286	0.162239477288624	0.215111742608095	0.714280127612232	0.0540798257628746	no	1.62632856232833	no
WBGene00227048	Bm6787a	Bm6787a	0	7.30350187136381	5.14576022146356	0	35.4254751554054	3.35412192280165	16.8005242133588	19.8431670800427	2.8332940480884	no	5.43740365820274	no
WBGene00232486	Bm12225	Bma-dus-2	0	6.64540794447287	0	0	2.65970258965006	0.626760684503392	2.49304765945312	3.93271939785868	0.208920228167797	no	4.08026872487241	no
WBGene00234063	Bm13802	Bma-ltah-1.2	0	5.08776119526155	1.09160155204145	0	5.29433595695414	0.822602498956968	3.18115186850011	4.52108300690527	0.638068016999474	no	3.37048458892354	no
WBGene00222968	Bm2707a	Bm2707a	3	0	0	0	0	0	0	0	0	no	1	no
WBGene00229560	Bm9299	Bma-cebp-2	0	0	0	0	0	0	0	0	0	no	1	no
WBGene00235049	Bm14714	Bma-lpd-2	1	0	4.85604860548873	0	0	0.151814817238907	0	0	1.66928780757588	no	0.37463176400905	no
WBGene00268812	Bm17670	Bm17670	1	0	0	0	0	0.0741407618714341	0	0	0.024713587290478	no	0.975882444034118	no
WBGene00229561	Bm9300	Bm9300	0	0	30.1846653216533	0	5.086636894022	0.513715443317973	1.58930403878953	2.22531364427051	10.2327935883238	no	0.287133705334277	no
WBGene00225072	Bm4811	Bma-ath-1	4	8.09063382379969	136.273913945299	0	0.647625545726443	0.109009564753842	0	2.91275312317538	45.4609745033508	no	0.084215907328702	no
WBGene00227834	Bm7573	Bm7573	9	14.9827589622048	0	0	12.4529248458504	2.09610001692531	10.421994730963	12.6192261796727	0.698700005641769	no	8.0174404747396	no
WBGene00227833	Bm7572	Bm7572	7	17.1802308137528	0	0	31.8659623359592	3.25075117832246	15.8397620108833	21.6286517201985	1.08358372610749	no	10.8604475244548	no
WBGene00229564	Bm9303	Bm9303	0	0	0	0	0	0	0	0	0	no	1	no
WBGene00235467	NA	NA	NA	0	0	0	0	0	0	0	0	no	1	no
WBGene00229565	Bm9304	Bm9304	0	0	98.6253907685848	0	0	1.33330273597228	0	0	33.319564501519	no	0.0291378988785169	no
WBGene00268813	Bm17671	Bma-ndx-1	2	0	0	0	0	0	0	0	0	no	1	no
WBGene00235468	NA	NA	NA	0	0	0	0	2.07235387618057	0	0	0.690784625393523	no	0.591441384657288	no
WBGene00226631	Bm6370a	Bma-mig-1	7	0	0	0	0.509342511051758	0	0.265237499356111	0.258193336802623	0	no	1.25819333680262	no
WBGene00228289	Bm8028	Bma-ced-12	0	4.14135512463169	179.122657557186	0	0.663000558682311	0.223195032408562	3.62516846253714	2.80984138195038	59.781950863198	no	0.0626804722100018	no
WBGene00227386	Bm7125	Bma-sesn-1	0	0	0	0	0	0.0467391561743162	0	0	0.0155797187247721	no	0.984659285295363	no
WBGene00268814	Bm17672	Bm17672	0	0	0	0	0.909814831024515	1.83770117267979	0	0.303271610341505	0.61256705755993	no	0.808196846284062	no
WBGene00226817	Bm6556	Bma-cdap-2	0	0	0	0	0.274482072358708	0.0924026899124023	0	0.0914940241195694	0.0308008966374674	no	1.05887958351616	no
WBGene00227054	Bm6793	Bm6793	0	0	93.7605711681034	0	0	0.315819599319612	82.0734575639707	27.3578191879902	31.3587969224744	no	0.876355794559677	no
WBGene00227053	Bm6792	Bma-cogc-1	0	0	5.19067059205801	0	0	0.193892264069208	0	0	1.79485428537574	no	0.35780040670906	no
WBGene00226176	Bm5915	Bma-pigu-1	10	4.87131118982704	0	0	0.459655545902992	0	1.43617960309724	2.25571544627576	0	no	3.25571544627576	no
WBGene00226175	Bm5914a	Bm5914a	0	0	0	0	0	0.112345619635554	0	0	0.037448539878518	no	0.963903231399889	no
WBGene00224058	Bm3797	Bma-dhhc-3	4	0	0	0	1.74012456663275	0	0	0.580041522210918	0	no	1.58004152221092	no
WBGene00224056	Bm3795	Bma-gpaa-1	8	6.23414277641222	0	0	2.99412150318854	0.419980192819335	2.33876011635338	3.85567479865138	0.139993397606445	no	4.25938852702697	no
WBGene00225954	Bm5693	Bm5693	0	0	0	0	0	0	0	0	0	no	1	no
WBGene00226228	Bm5967	Bm5967	0	0	0	0	0	0	0	0	0	no	1	no
WBGene00222616	Bm2355a	Bma-sup-46	1	0	0	0	0.59619992962476	0	0	0.19873330987492	0	no	1.19873330987492	no
WBGene00220982	Bm721	Bma-fkh-10	0	0	0	0	0	0	0	0	0	no	1	no
WBGene00230900	Bm10639	Bm10639	insdc=CDQ	0	296.42540587535	0	0	0	0	0	98.8084686251165	no	0.0100191898921526	no
WBGene00224057	Bm3796a	Bm3796a	1	0	2.12119165668631	0	0	0	0	0	0.707063885562103	no	0.585801157448023	no
WBGene00235459	NA	NA	NA	0	0	0	0	0	0	0	0	no	1	no
WBGene00230899	Bm10638	Bm10638	1	0	0	0	0	0.302794831869274	0	0	0.100931610623091	no	0.908321634469223	no
WBGene00222685	Bm2424	Bma-pigo-1	13	0	0.945463775516199	0	2.42695344554443	0.0583584891702628	0	0.808984481848142	0.334607421562154	no	1.35544314576846	no
WBGene00230897	Bm10636	Bma-tres-1	0	0	0	0	0	10.1596044380307	0	0	3.38653481267689	no	0.227970378146788	no
WBGene00226587	Bm6326	Bma-crtc-1	0	0	0	0	0	0	0	0	0	no	1	no
WBGene00234367	Bm14106	Bm14106	1	17064.0155336188	214.6958890662	9538.97667561849	5935.31630756052	596.279649581523	4774.89856718399	9258.07680278777	3449.98407142207	yes	2.68302507666235	no
WBGene00230026	Bm9765	Bma-gap-3	2	0	0	0	0	0	1.06807684469778	0.356025614899261	0	no	1.35602561489926	no
WBGene00230025	Bm9764	Bm9764	0	0	0	0	2.16446496189859	0.0910817157300534	0.845350517796603	1.00327182656506	0.0303605719100178	no	1.94424348250392	no
WBGene00230024	Bm9763	Bm9763	0	0	0	0	0	0	0	0	0	no	1	no
WBGene00223135	Bm2874a	Bm2874a	1	0	0	0	1.50559101228712	0.253423945410642	0	0.501863670762372	0.0844746484702139	no	1.3848766984834	no
WBGene00230023	Bm9762	Bm9762	1	0	0	0	0	0	0	0	0	no	1	no
WBGene00223664	Bm3403a	Bma-ppfr-1	0	0	0	0	0.0836500558769982	0	0	0.0278833519589994	0	no	1.027883351959	no
WBGene00235458	NA	NA	NA	0	0	0	25.4444881076523	12.8485940323195	0	8.48149603588409	4.28286467743985	no	1.794764131736	no
WBGene00235457	NA	NA	NA	0	0	0	0	0	0	0	0	no	1	no
WBGene00230021	Bm9760	Bma-dyf-5	0	0	0	0	0	0.0556698181642961	0	0	0.0185566060547654	no	0.981781468065244	no
WBGene00221350	Bm1089	Bm1089	0	0	0	0	0	0	0	0	0	no	1	no
WBGene00222156	Bm1895	Bma-mlt-2	0	0	0	0	0.25231422759902	0.0424700111248993	0.394174018434908	0.215496082011309	0.0141566703749664	no	1.19852890339113	no
WBGene00227238	Bm6977a	Bma-grl-16	1	0	0	0	0.228794477938726	0	0	0.0762648259795752	0	no	1.07626482597958	no
WBGene00234260	Bm13999	Bma-eif-2alpha	1	0	0	0	0	0.282697338444874	0	0	0.0942324461482914	no	0.913882606497376	no
WBGene00226656	Bm6395	Bma-phb-1	1	0	2.52505378556558	0	0	468.774560412441	0	0	157.099871399336	no	0.00632511583437128	no
WBGene00234159	Bm13898	Bm13898	0	0	693.007046285272	0	0	289.96675958135	1030.38438058022	343.461460193405	327.657935288874	no	1.04808502460359	no
WBGene00234166	Bm13905	Bma-rla-1	0	458.616682777251	3732.33011849542	0	0	3649.7477164597	228.795100607369	229.137261128207	2460.69261165171	no	0.093487407826192	no
WBGene00228937	Bm8676	Bm8676	1	0	0	0	0	0	1.07368649199136	0.357895497330455	0	no	1.35789549733045	no
WBGene00232606	Bm12345	Bma-tns-1	0	0	0.915703965783009	0	0	50.7783550766608	0.0503295263402159	0.016776508780072	17.2313530141479	no	0.0557707652301522	no
WBGene00268816	Bm17674	Bm17674	2	0	0	0	0	0	0	0	0	no	1	no
WBGene00268817	Bm17675	Bm17675	0	0	0	0	0	0	2.52115813341454	0.840386044471512	0	no	1.84038604447151	no
WBGene00230101	Bm9840	Bm9840	0	0	0	0	0	0	0	0	0	no	1	no
WBGene00268818	Bm17676	Bm17676	0	0	0	0	0	0	0	0	0	no	1	no
WBGene00234851	NA	NA	NA	0	0	0	0	0	0	0	0	no	1	no
WBGene00268819	Bm17677	Bma-hot-5	1	0	0	0	0	0	0	0	0	no	1	no
WBGene00223423	Bm3162a	Bma-unc-15	0	1.70847394211322	802.622596407027	0	0	1077.97940132614	0.25184958756179	0.653441176558337	626.867332577721	no	0.00263342443660845	no
WBGene00223422	Bm3161	Bma-sue-1	0	0	0	0	0	0	0	0	0	no	1	no
WBGene00223421	Bm3160a	Bm3160a	1	0	0	0	0	0	0	0	0	no	1	no
WBGene00268821	Bm17679	Bm17679	3	0	0	0	0	0.295823346868447	0	0	0.0986077822894822	no	0.910242960336595	no
WBGene00222617	Bm2356a	Bma-fath-1	6	0	0	0	0.684195975407441	0	1.0688746314058	0.584356868937748	0	no	1.58435686893775	no
WBGene00234344	Bm14083	Bma-nola-3.1	0	0	145.088740923574	0	0	555.942797475908	0	0	233.677179466494	no	0.00426117274067023	no
WBGene00268822	Bm17680	Bma-nola-3.2	1	0	114.58505435827	0	0	445.215655637356	0	0	186.600236665209	no	0.00533048368049023	no
WBGene00225457	Bm5196a	Bm5196a	0	0	52.5878650958833	0	0	0.133653890766153	1.24047274317449	0.413490914391496	17.5738396622165	no	0.0761011691764985	no
WBGene00227528	Bm7267	Bm7267	0	0	0	0	2.77913098263192	0.233894308840768	2.17082730055535	1.64998609439576	0.0779647696135894	no	2.45832347131872	no
WBGene00222498	Bm2237a	Bm2237a	0	0	369.3722050478	0	0	0	0	0	123.124068349267	no	0.00805645523305076	no
WBGene00229742	Bm9481	Bm9481	0	7.17724064248763	37.2121383335611	0	1.14902354725976	0.290108746339377	35.0033648422714	14.4432096773396	12.5007490266335	no	1.14387799127842	no
WBGene00233883	Bm13622	Bm13622	8	0	0	0	1.3073285992514	0.0733506795375045	0.680784660573782	0.662704419941727	0.0244502265125015	no	1.62302118434979	no
WBGene00234865	NA	NA	NA	0	0	0	0	0	0	0	0	no	1	no
WBGene00232623	Bm12362a	Bma-itx-1	0	0	0	0	0.937842890753473	0.0526198335870385	0.162792291195633	0.366878393983035	0.0175399445290128	no	1.3433166936908	no
WBGene00227631	Bm7370	Bm7370	1	0	0	0	0.730813444930175	0.0615059551571064	1.71255308344434	0.814455509458171	0.0205019850523688	no	1.77800292016586	no
WBGene00229741	Bm9480	Bm9480	0	0	0	0	0	0	0	0	0	no	1	no
WBGene00226471	Bm6210	Bma-snx-3	0	0	0	0	0	0.230124072220648	0	0	0.0767080240735495	no	0.928756893829641	no
WBGene00221169	Bm908a	Bma-vps-51	0	0	0	0	1.08754342077982	0.0610191263209729	1.13266531306482	0.740069577948212	0.0203397087736576	no	1.70538259266573	no
WBGene00225868	Bm5607	Bm5607	1	0	0	0	0	0.0291109297613161	0.270185287464332	0.0900617624881108	0.00970364325377202	no	1.07958584657116	no
WBGene00226584	Bm6323	Bm6323	1	0	0	0	0	0	0.816227102741324	0.272075700913775	0	no	1.27207570091377	no
WBGene00224595	Bm4334	Bma-cutl-20	1	0	0	0	0	0	0	0	0	no	1	no
WBGene00224596	Bm4335	Bma-shc-1	0	0	0	0	0.847208261076102	0	0	0.282402753692034	0	no	1.28240275369203	no
WBGene00223966	Bm3705	Bma-stl-1	0	0	0	0	0.63735149726933	0.214560434717276	0.995692566466803	0.544348021245378	0.0715201449057586	no	1.44126830334226	no
WBGene00223964	Bm3703	Bma-calm-1	0	0	5.96572631830274	0	0	0	0	0	1.98857543943425	no	0.334607581526972	no
WBGene00227374	Bm7113	Bma-bre-4	1	0	0	0	0	0.122913845972445	0	0	0.0409712819908148	no	0.960641294625862	no
WBGene00224818	Bm4557a	Bm4557a	0	0	0	0	2.28914550012616	0.144492498176778	1.34106837110405	1.21007129041007	0.0481641660589262	no	2.10851635838676	no
WBGene00225003	Bm4742a	Bma-gfi-2	0	0	0	0	1.33859648089359	0.225315107975792	2.61400218567531	1.3175328888563	0.0751050359919306	no	2.15563392531043	no
WBGene00268823	Bm17681	Bm17681	4	0	0	0	0	0.185494620293352	0	0	0.0618315400977841	no	0.941768973925855	no
WBGene00228233	Bm7972	Bma-unc-13	0	0	0	0	0.2496500156957	30.4536291197432	0.167147954741406	0.138932656812369	10.1512097065811	no	0.102135345561676	no
WBGene00225087	Bm4826	Bm4826	4	0	0	0	2.46104667349673	0.414248061224703	0	0.820348891165575	0.138082687074901	no	1.59948737630324	no
WBGene00225148	Bm4887	Bma-xpa-1	0	12.5037068185995	0	0	12.010510120745	0.673877309387388	10.9452201657371	11.8198123683605	0.224625769795796	no	10.4683509726389	no
WBGene00224899	Bm4638a	Bma-pms-2	0	41.9690071119184	1.06858949068943	0	64.8957056715362	2.1227599135544	45.9709293055651	50.9452140296732	1.06378313474794	no	25.1698994700902	no
WBGene00227505	Bm7244a	Bm7244a	1	1.2809385332209	5.40937387998787	0	0.820275429278662	0.0345175804575612	0	0.700404654166522	1.81463048681514	no	0.604130688604383	no
WBGene00222898	Bm2637a	Bma-irx-1	0	1.65014023192915	0.360200048294658	0	0.528350678823027	0.0222332480227021	0.206351928898611	0.79494761321693	0.12747776543912	no	1.59200267024144	no
WBGene00235519	NA	NA	NA	0	0	0	52.0455438565614	4.38020251101802	0	17.3485146188538	1.46006750367267	no	7.45854111379506	no
WBGene00235636	NA	NA	NA	0	0	0	176.154148437593	14.8253008065225	137.597053512124	104.583733983239	4.94176693550751	no	17.7697535311052	no
WBGene00221102	Bm841	Bm841	1	484532.73645033	6227.10741793343	442809.33831029	215260.369390738	22587.8283088177	321487.549385874	340426.885075647	157208.09134568	yes	2.16544655376892	no
WBGene00228919	Bm8658	Bm8658	0	0	0	0	1.01977374852543	0.0686601034858543	0	0.33992458284181	0.0228867011619514	no	1.30994427957634	no
WBGene00223845	Bm3584a	Bm3584a	0	6.88507207665026	0	0	2.3854207600924	0.301138922632489	4.6582335824417	4.64290880639479	0.100379640877496	no	5.12814722916434	no
WBGene00226548	Bm6287	Bm6287	0	0	0	0	0	0	0	0	0	no	1	no
WBGene00222310	Bm2049a	Bm2049a	0	0	112.965730449043	0	0.28914191031423	0.0486689167890892	0	0.0963806367714101	37.6714664552773	no	0.0283511523422405	no
WBGene00233599	Bm13338	Bm13338	10	0	0	0	0.190041819891179	0	0	0.0633472732970596	0	no	1.06334727329706	no
WBGene00268825	Bm17683	Bm17683	0	0	0	0	0	0	0	0	0	no	1	no
WBGene00228570	Bm8309	Bma-fhod-1.1	0	277.652365077678	0	0	129.845583642143	7.37989937055172	89.5698050844754	165.689251268099	2.45996645685057	no	48.1765512316056	no
WBGene00229350	Bm9089	Bma-fhod-1.2	0	3.25299006758991	45.1572743370969	0	11.2703976853335	1.06709332166296	6.60262699104625	7.04200491465656	15.4081225529199	no	0.490123406180034	no
WBGene00223262	Bm3001	Bma-eaf-1	0	0	0	0	9.90174655132694	0.454549317181116	5.62503677879752	5.17559444337482	0.151516439060372	no	5.36301023059129	no
WBGene00234182	Bm13921	Bma-sac-1	2	4.81705357820436	0	0	4.62704952959496	0.519222523616213	5.42140268089527	4.95516859623153	0.173074174538738	no	5.07654905843712	no
WBGene00268826	Bm17684	Bm17684	1	93.7791387989663	0	0	123.164689151487	9.88353387101503	58.1711120539061	91.7049800014533	3.29451129033834	no	21.5868520848969	no
WBGene00229349	Bm9088	Bm9088	0	31.7167197349841	0	0	10.155228069573	1.70934732137289	19.831060927468	20.5676695773417	0.569782440457629	no	13.7392730492349	no
WBGene00220554	Bm293	Bm293	1	97.9856021682228	0	0	61.9517971316751	4.09665316972507	62.21779810983	74.0517324699093	1.36555105657502	no	31.7269552315533	no
WBGene00221463	Bm1202	Bm1202	1	0	0	0	27.2619515439131	2.29439179148563	9.46434759607202	12.2420997133284	0.764797263828544	no	7.50346795336765	no
WBGene00221462	Bm1201	Bm1201	0	0	0	0	11.3873890088946	1.91674699636791	10.6738639223726	7.35375097708907	0.638915665455969	no	5.097120708017	no
WBGene00233953	Bm13692	Bma-copa-1	0	10.7791975433032	0.312815998732499	0	13.5378888922582	0.707189968143161	6.56359403156396	10.2935601557084	0.340001988958553	no	8.42801745726197	no
WBGene00229348	Bm9087a	Bm9087a	1	12.5973056807379	4.12469500481142	0	16.1338894209684	0.848652181791251	12.6024602071871	13.7778851029644	1.65778239553422	no	5.56023138982153	no
WBGene00235489	NA	NA	NA	840.060152058038	0	0	1581.75529164065	87.4234233126896	995.805480056815	1139.20697458517	29.1411411042299	NA	37.8289252766597	NA
WBGene00228545	Bm8284	Bma-goa-1	0	240.743911648035	19.7628510172048	338.94840979355	76.0566932412927	4.86364473159594	259.947674988967	192.249426626098	121.191635180784	no	1.58152746168086	no
WBGene00235512	NA	NA	NA	567.251661002884	0	0	942.942794577702	42.5137302539985	868.075528775018	792.756661451868	14.1712434179995	NA	52.31981582407	NA
WBGene00233636	Bm13375	Bm13375	2	0	0	0	11.178540800433	0	2.49478618641229	4.55777566228176	0	no	5.55777566228176	no
WBGene00223731	Bm3470	Bm3470	0	33.4660478520075	0.356641247132181	0	2.35408742058233	0.220135820085429	2.04313157699328	12.621088949861	0.19225902240587	no	11.4246054706929	no
WBGene00255666	NA	NA	NA	0	0	0	0	0	0	0	0	no	1	no
WBGene00234391	Bm14130	Bm14130	1	0	0	0	1.83936058609534	0	0	0.613120195365115	0	no	1.61312019536511	no
WBGene00229014	Bm8753a	Bm8753a	0	0	0	0	0	0	0	0	0	no	1	no
WBGene00227320	Bm7059	Bma-drag-1	0	22.274346199014	0	0	27.1601608177443	1.52388332472052	17.2865175947584	22.2403415371722	0.507961108240175	no	15.4117645409929	no
WBGene00233322	Bm13061	Bm13061	0	0	0	0	80.2337143248597	7.87797006361198	67.8946045067123	49.3761062771907	2.62599002120399	no	13.8930625794893	no
WBGene00227294	Bm7033a	Bm7033a	0	5.0256517597263	0	0	0	0.159642916119108	1.48168291212061	2.1691115572823	0.053214305373036	no	3.00899023220145	no
WBGene00227649	Bm7388	Bm7388	1	18.1521982659368	250.747989370123	0	28.3007694709212	2.11717306402794	20.8780973746512	22.4436883705031	84.2883874780503	no	0.27487550255932	no
WBGene00234228	Bm13967	Bma-adsl-1	2	0	0	0	2.99151395125892	0.419614436065302	1.55781554161342	1.51644316429078	0.139871478688434	no	2.20765517107794	no
WBGene00231555	Bm11294a	Bma-rad-8	0	31.4953721255002	4.78215688599392	0	44.0932433666769	2.63356275196612	17.7765137456657	31.1217097459476	2.47190654598668	no	9.25189354047517	no
WBGene00224872	Bm4611	Bma-frh-1	0	0	0	0	23.1080113994824	1.94479223496259	32.4901216163845	18.532711005289	0.648264078320865	no	11.8504742426878	no
WBGene00229709	Bm9448	Bm9448	0	125.201230638756	0	0	30.0656971075103	2.53035768689006	11.7424181334198	55.6697819598953	0.843452562296687	no	30.741112149527	no
WBGene00223614	Bm3353	Bma-mrpl-13	0	13.3186597769812	0	0	2.13221967382561	0.358899274645797	0	5.15029315026895	0.119633091548599	no	5.49313270275201	no
WBGene00223613	Bm3352	Bm3352	6	65.2092556945101	0	0	43.2484217127234	1.94124178014271	36.0342299408521	48.1639691160285	0.647080593380902	no	29.8491581490323	no
WBGene00224759	Bm4498	Bma-rpt-5	0	7.99789801536363	0	0	18.5658691531933	1.93968151452406	12.0017558556843	12.8551743414137	0.646560504841352	no	8.41461598324241	no
WBGene00231553	Bm11292	Bm11292	0	61.7127808583433	0	0	34.7900507638141	3.9039517167012	24.5108841228032	40.3379052483202	1.3013172389004	no	17.9627148093985	no
WBGene00224838	Bm4577	Bma-mrpl-24	0	20.9249519385334	0	0	9.9683590132868	1.83042890844283	4.24715875502401	11.7134899022814	0.610142969480943	no	7.89587641796792	no
WBGene00221125	Bm864	Bm864	0	0	0	0	3.25284649103509	0.547525313877253	5.08170936266367	2.77818528456625	0.182508437959084	no	3.19505989410706	no
WBGene00225369	Bm5108	Bma-let-70.2	0	0	740.534645067295	0	0	96.6207436871901	4.75734493525961	1.58578164508654	279.051796251495	no	0.00923322642345927	no
WBGene00224839	Bm4578a	Bma-zipt-11	8	22.8187719825342	0	0	39.117961274436	4.20970456953622	23.0420156819519	28.3262496463074	1.40323485651207	no	12.2028230269887	no
WBGene00234294	Bm14033a	Bma-did-2	0	0	0	0	7.49898953643456	0.631122097371406	8.78638573388921	5.42845842344126	0.210374032457135	no	5.31113379092501	no
WBGene00221645	Bm1384a	Bm1384a	0	0	0	0	16.8905569348157	0.448902741812406	8.3327408182808	8.40776591769885	0.149634247270802	no	8.18326867004233	no
WBGene00231700	Bm11439	Bma-ahr-1	1	37.6437497000403	281.74498291401	0	63.360585043484	4.72498861183277	29.1313961467749	43.3785769634331	95.4899905086143	no	0.459929332871798	no
WBGene00234841	NA	NA	NA	0	0	0	0	0	0	0	0	no	1	no
WBGene00229711	Bm9450	Bma-gras-1	0	37.6887765849423	2.18748236889846	0	15.5060850549128	1.64842974042588	17.8493683101971	23.6814099833507	1.27863736977478	no	10.8316532989144	no
WBGene00229712	Bm9451	Bm9451	0	0	69.7478442918988	0	0	0.599467839766075	0	0	23.4491040438883	no	0.040901294305301	no
WBGene00226452	Bm6191	Bm6191	0	0	0	0	0.402744271841137	0.0677906825482916	0	0.134248090613712	0.0225968941827639	no	1.10918397764172	no
WBGene00229713	Bm9452a	Bm9452a	5	17.177112699463	0	0	2.74992966639292	0.347155047405812	9.66607941213961	9.86437392599852	0.115718349135271	no	9.73755960401554	no
WBGene00232873	Bm12612a	Bma-mfb-1	0	13.1538603510668	118.327734033407	0	8.06776452193852	1.56690171125848	0.969518534231768	7.39704780241237	39.9648785815553	no	0.204981635321951	no
WBGene00234429	Bm14168	Bm14168	0	0	0	0	0	0	0	0	0	no	1	no
WBGene00226546	Bm6285	Bm6285	1	1.47782683885753	3.94084610950213	0	1.39447322475259	0.0704161163627304	0.435698866315336	1.10266630997515	1.33708740862162	no	0.89969519420554	no
WBGene00225026	Bm4765a	Bma-dpf-3	2	0	58.4030487109745	0	1.49307509678155	0.125658621342978	0.583133397117396	0.692069497966316	19.5095691107725	no	0.0825014649906794	no
WBGene00222595	Bm2334a	Bma-coq-1	0	0	0	0	0.852253044171457	0.286905709690797	1.33141920034061	0.72789074817069	0.0956352365635991	no	1.57706752257268	no
WBGene00229714	Bm9453a	Bm9453a	0	0	127.55254233609	0	0	0	0	0	42.5175141120299	no	0.022979253764947	no
WBGene00229715	Bm9454	Bma-lron-9	2	18.4737130977951	0	0	1.64511776558097	0.276909354144818	4.28343317925673	8.13408801421093	0.0923031180482725	no	8.36222827096907	no
WBGene00226229	Bm5968a	Bm5968a	1	0	0	0	0	0	1.79144886896105	0.597149622987018	0	no	1.59714962298702	no
WBGene00226230	Bm5969a	Bm5969a	0	0	0	0	2.42585162043295	0.612485944337266	0	0.808617206810983	0.204161981445755	no	1.50197169041951	no
WBGene00226237	Bm5976a	Bm5976a	1	6.29311069092734	28.600983177814	0	1.5112212470449	0.593533820234734	0.786960710804053	2.86376421625876	9.73150566601626	no	0.360039339912408	no
WBGene00231502	Bm11241	Bma-cpn-1	0	0	0	0	3.83264256014846	0.161279422999827	0	1.27754752004949	0.0537598076666089	no	2.16135356793762	no
WBGene00224690	Bm4429	Bm4429	0	0	0	0	0.686246307967846	0.115510284977401	0	0.228748769322615	0.0385034283258002	no	1.18319182759321	no
WBGene00229717	Bm9456	Bma-mat-1.2	0	33.2906342218358	0	0	0	0	0	11.0968780739453	0	no	12.0968780739453	no
WBGene00225969	Bm5708	Bma-ztf-4	1	6.19261861386024	0	0	0.584333740670759	0	0	2.258984118177	0	no	3.258984118177	no
WBGene00227545	Bm7284a	Bma-mat-1.1	0	7.45497881458129	0	0	10.1446428155591	0.502225173901741	4.19514143606997	7.26492102207011	0.16740839130058	no	7.07971698992361	no
WBGene00229718	Bm9457	Bma-oaz-1	1	0	236.218090691346	0	0	0	2.06912862424247	0.689709541414156	78.739363563782	no	0.0211904066686285	no
WBGene00227303	Bm7042a	Bm7042a	0	0	0	0	0	526.448619875897	3.30029833147161	1.10009944382387	175.482873291966	no	0.0118997351111207	no
WBGene00224484	Bm4223b	Bm4223b	0	0	9.44439249584215	0	0	0	1.80865692179738	0.602885640599128	3.14813083194738	no	0.386411544268153	no
WBGene00224485	Bm4224	Bm4224	2	0	0	0	2.68842912619007	0.633530111948134	0.839991404394277	1.17614017686145	0.211176703982711	no	1.79671568129213	no
WBGene00233677	Bm13416	Bm13416	3	0	1083.83877697607	0	0	0.294467395698691	0	0	361.377748123923	no	0.0027595513388367	no
WBGene00229719	Bm9458	Bm9458	0	0	0	0	0	0	0	0	0	no	1	no
WBGene00236047	NA	NA	NA	0	0	0	0	3.53631028412464	0	0	1.17877009470821	no	0.458974539089184	no
WBGene00224668	Bm4407	Bma-pqn-44	0	9.04759051263621	36.266565688969	0	0.724226416726345	0.121903169187092	1.13141157220595	3.63440950052284	12.1294896193854	no	0.35297712514889	no
WBGene00223913	Bm3652	Bma-bckd-1B	2	0	0	0	0.789928916760505	0	0	0.263309638920168	0	no	1.26330963892017	no
WBGene00227960	Bm7699	Bma-ces-2	0	0	0	0	0	0	0	0	0	no	1	no
WBGene00268828	Bm17686	Bm17686	1	0	0	0	0.693100462980843	0	0	0.231033487660281	0	no	1.23103348766028	no
WBGene00224625	Bm4364a	Bma-gnrr-1	7	0	31.8309573580264	0	0.561550742934944	0.0945212900857249	1.75454800947289	0.772032917469278	10.6418262160374	no	0.152212624083684	no
WBGene00223869	Bm3608	Bma-let-381	1	0	0	0	1.01777952430609	0.171314587097594	1.5900103961401	0.869263306815397	0.0571048623658646	no	1.76828560094963	no
WBGene00223907	Bm3646a	Bm3646a	0	3.0685917838631	0	0	0.982518043414653	0.248068961258985	0.383730922590928	1.47828024995623	0.082689653752995	no	2.28900335508482	no
WBGene00225479	Bm5218a	Bm5218a	2	0	0	0	1.49804007611559	0	0.780096683671004	0.759378919928866	0	no	1.75937891992887	no
WBGene00222097	Bm1836a	Bma-fkb-7	1	0	0	0	1.46748089054066	0.123504588583655	1.14627471685845	0.871251869133038	0.0411681961945515	no	1.7972618410478	no
WBGene00222354	Bm2093a	Bm2093a	12	0	0	0	0.289507450023856	0	0.452278557688398	0.247262002570751	0	no	1.24726200257075	no
WBGene00222996	Bm2735	Bma-hlh-15	0	0	2376.40453691929	0	0	0	15.1589974208272	5.05299914027574	792.134845639764	no	0.00763174026907522	no
WBGene00229721	Bm9460a	Bm9460a	0	0	0	0	0.454726753313881	0.102053963719774	0.236796623730158	0.230507792348013	0.0340179879065913	no	1.19002551864617	no
WBGene00225262	Bm5001a	Bm5001a	0	0	93.1991159916577	0	0.906932249381665	2.74781812968418	0	0.302310749793888	31.9823113737806	no	0.0394851268922639	no
WBGene00234050	Bm13789	Bma-unc-101	0	7.90002355068955	1.998071460654	0	16.3997677256352	1.63116916425932	5.82279197805212	10.0408610847923	1.20974687497111	no	4.99643701722021	no
WBGene00221504	Bm1243	Bm1243	0	0	0	0	0	0	0	0	0	no	1	no
WBGene00233323	Bm13062	Bm13062	0	0	0	0	0	0	0	0	0	no	1	no
WBGene00268829	Bm17687	Bm17687	1	10.3279715526916	0	0	10.7473108613549	0.417463344010382	6.45762345002748	9.17763528802467	0.139154448003461	no	8.93437698975982	no
WBGene00230480	Bm10219	Bm10219	2	0	3244.77504339878	0	2.22330478610554	3825.38819995253	3.47332368088857	1.8988761556647	2356.7210811171	no	0.00122952463668484	no
WBGene00225066	Bm4805a	Bm4805a	0	0	0	0	1.33970588710338	0.0751672817803405	0.697644967105153	0.679116951402843	0.0250557605934468	no	1.63807376725607	no
WBGene00222955	Bm2694a	Bm2694a	0	0	46.1137037215362	0	4.61508248627308	0.466091681946295	4.32590494717681	2.9803291444833	15.5265984678275	no	0.2408438222924	no
WBGene00227313	Bm7052	Bma-pghm-1	1	0	3910.40202886116	0	2.48037252064847	77.5508153209863	0.968730948095106	1.14970115624786	1329.31761472738	no	0.00161593076153351	no
WBGene00230481	Bm10220	Bma-rde-1	0	3.6957087199271	0	0	4.43741880187709	0.199177274754986	3.69722091855339	3.94344948011919	0.0663924249183286	no	4.63567572743945	no
WBGene00227699	Bm7438a	Bm7438a	0	0	0	0	2.673676508685	24.5270884329742	2.08845498617351	1.58737716495284	8.17569614432475	no	0.281981565676971	no
WBGene00225941	Bm5680	Bma-unc-29	5	0	0	0	1.41766648556874	0.0795414405632658	0	0.47255549518958	0.0265138135210886	no	1.43452087618627	no
WBGene00230482	Bm10221	Bma-pyk-2.2	0	0	4.12116194727834	0	0	0	0.791487475954696	0.263829158651565	1.37372064909278	no	0.532425396869928	no
WBGene00234994	Bm14809	Bm14809	2	0	0	0	2.0649268978257	190.817262139137	3.2259002626828	1.76360905350283	63.605754046379	no	0.0427765157190009	no
WBGene00228638	Bm8377	Bm8377	5	0	2617.33263069624	0	3.43157432021284	10.3969642019768	0	1.14385810673761	875.909864966073	no	0.00244478730641325	no
WBGene00223851	Bm3590a	Bma-pyk-1	0	4.67306128731717	112.250176832714	0	1.87030703176144	349.380177811211	1.75311502351285	2.76549444753049	153.876784881308	no	0.0243128397223394	no
WBGene00230483	Bm10222	Bma-pyk-2.3	0	0	798.703954646055	0	0	0	5.96253898552538	1.98751299517513	266.234651548685	no	0.011179362323942	no
WBGene00230484	Bm10223	Bm10223	1	0	0	0	0	0	3.55972476747784	1.18657492249261	0	no	2.18657492249261	no
WBGene00230485	Bm10224	Bm10224	0	0	0	0	0	0.691094255436282	0	0	0.230364751812094	no	0.812767107093396	no
WBGene00225628	Bm5367a	Bma-kel-20	0	0	0	0	2.54586317919811	0.321393402698376	2.98292667424838	1.84292995114883	0.107131134232792	no	2.56783488716438	no
WBGene00223542	Bm3281	Bma-lron-5	1	0	78.9041304383629	0	1.14157723314492	0.384304906250834	1.78341146127379	0.974996231472903	26.4294784482046	no	0.0720026899236277	no
WBGene00234339	Bm14078	Bma-ddp-1	0	30.450278980826	194.411375307908	0	0	0	0	10.1500929936087	64.8037917693027	no	0.169444536459222	no
WBGene00227519	Bm7258a	Bma-csnk-1	0	0	0	0	0.991450992396884	0.0417207296211263	0.774439526207431	0.588630172868105	0.0139069098737088	no	1.56684026649545	no
WBGene00222978	Bm2717a	Bma-tufm-2	0	0	0	0	0.866441138739578	0	27.0716866539177	9.3127092642191	0	no	10.3127092642191	no
WBGene00222984	Bm2723	Bma-cogc-5	0	0	0	0	1.47646932926415	0.248522128284711	0	0.492156443088052	0.0828407094282369	no	1.3780017966594	no
WBGene00255608	Bm16949a	Bm16949a	0	0	1.22761510542582	0	2.74800471562644	10.1760864735971	1.43100935652609	1.39300469071751	3.8012338596743	no	0.498414524403076	no
WBGene00222977	Bm2716	Bm2716	0	0	0	0	1.66815340891933	0.0311985286094363	1.15824310524168	0.942132171387002	0.0103995095364788	no	1.92214282870936	no
WBGene00222982	Bm2721a	Bm2721a	0	0	443.743452340927	0	0	0.132187181402464	1.22685987356489	0.408953291188297	147.958546507443	no	0.00945869387304941	no
WBGene00222983	Bm2722	Bma-cdc-6	1	0	0.965713581990102	0	5.76464173615784	240.759526313602	1.12571535283676	2.29678569633153	80.5750799651975	no	0.0404141276691123	no
WBGene00226876	Bm6615	Bma-scpl-3	0	6.21800470092705	1159.57724652396	0	0	1610.07400852349	0.916608606537337	2.37820443582146	923.217085015815	no	0.00365520665067954	no
WBGene00223303	Bm3042a	Bm3042a	0	0	1.02849791004174	0	2.68599656632388	0.0645874364895419	0.599450970394642	1.09514917890617	0.364361782177093	no	1.5356258188081	no
WBGene00222232	Bm1971a	Bma-snx-1	0	0	372.247557986552	0	0	0	0	0	124.082519328851	no	0.00799472224708658	no
WBGene00224602	Bm4341	Bm4341	0	0	7.4927679774525	0	2.23633196258662	0.188211826645306	3.49367518683127	1.9100023831393	2.56032660136594	no	0.817341415257483	no
WBGene00227966	Bm7705a	Bm7705a	0	0	3.09493180198406	0	0.758781951520445	0.383158867763008	0.592697712278864	0.450493221266437	1.15936355658236	no	0.671722562347095	no
WBGene00268200	Bm17072	Bm17072	0	0	16.0775909899493	0	2.07380930920417	327.512610844206	0.809944168285086	0.961251159163085	114.530067278052	no	0.0169761102487965	no
WBGene00232242	Bm11981	Bma-vacl-14	3	6.16695003254057	1.9847193987268	0	2.46820858987789	0.166181427449703	3.08473670300946	3.90663177514264	0.716966942058835	no	2.85773223406331	no
WBGene00225806	Bm5545	Bma-unc-57	0	0	0	0	2.12957588005769	0.119484755415247	0	0.709858626685897	0.0398282518050823	no	1.64436638812004	no
WBGene00234026	Bm13765	Bma-idha-1	0	0	0	0	0	0	1.4826039748509	0.4942013249503	0	no	1.4942013249503	no
WBGene00224326	Bm4065a	Bma-lmd-1	1	0	7.55083188797285	0	0	0.234036321171576	2.17214534991817	0.724048449972723	2.59495606971481	no	0.479574274772569	no
WBGene00227443	Bm7182	Bma-src-1	0	0	0	0	1.16598978090056	0.196261619638282	0	0.388663260300187	0.0654205398794274	no	1.30339448914448	no
WBGene00224777	Bm4516	Bma-let-607	0	0	0	0	2.55961691097843	142.895131097145	1.33290737381342	1.29750809493062	47.6317103657151	no	0.0472430041562005	no
WBGene00220787	Bm526	Bm526	1	0	466.725491678434	0	0	0	0	0	155.575163892811	no	0.00638670894628335	no
WBGene00230493	Bm10232	Bm10232	2	0	2.83644894968997	0	8.46581859404327	0	3.30639869807322	3.9240724307055	0.945482983229989	no	2.53102827069209	no
WBGene00230488	Bm10227	Bma-hxk-1.3	0	0	0	0	0	0.0936258977336862	0.868963660751816	0.289654553583939	0.0312086325778954	no	1.25062427993835	no
WBGene00234131	Bm13870	Bma-rpn-8	1	0	442.590692390665	0	0.81350050788231	52.03338258204	0	0.27116683596077	164.874691657568	no	0.0076634164215055	no
WBGene00236742	NA	NA	NA	0	0	0	0	0	0	0	0	no	1	no
WBGene00230489	Bm10228a	Bm10228a	0	0	0.759662812763501	0	0.566832655863541	0	0	0.18894421862118	0.253220937587834	no	0.948710784316793	no
WBGene00223539	Bm3278a	Bm3278a	0	120.445484850488	544.393568531607	0	5.43943926291854	0	8.49768026440671	44.794201459271	181.464522843869	no	0.250975919841996	no
WBGene00303418	Bm18574	Bm18574	0	0	147.554506552327	0	2.95484378024349	0	0	0.984947926747829	49.1848355174425	no	0.0395527434987394	no
WBGene00230490	Bm10229a	Bm10229a	0	3.89736186730661	0	0	2.94203170668213	0.185703141626587	0.574517968735382	2.47130384757471	0.0619010472088624	no	3.26895227827377	no
WBGene00224665	Bm4404a	Bma-ppk-1	1	3.52745237612184	0	0	1.99709645030992	0.224103384284643	0.519988865016748	2.0148458971495	0.074701128094881	no	2.80528773845609	no
WBGene00226232	Bm5971	Bma-snt-4	3	0	131.755950066901	0	0.792114814835248	0.133330273597228	0	0.264038271611749	43.9630934468329	no	0.028112795955786	no
WBGene00234106	Bm13845a	Bm13845a	0	0	0	0	1.06166153439439	0.357401781149361	4.97569317290017	2.01245156909819	0.119133927049787	no	2.69177039162729	no
WBGene00234269	Bm14008	Bma-nubp-1	0	0	40.70079901735	0	1.07461470187175	4.70291100197524	1.67880027748251	0.917804993118087	15.1345700064417	no	0.118863099069414	no
WBGene00223549	Bm3288a	Bma-ercc-1	0	0	0	0	3.33333905340423	0	0	1.11111301780141	0	no	2.11111301780141	no
WBGene00225748	Bm5487	Bma-mei-1	0	0	151.943136327841	0	3.7788843724236	0.477051758625725	1.47587598651618	1.75158678631326	50.8067293621557	no	0.0531125361548739	no
WBGene00223548	Bm3287a	Bma-ncs-2	0	0	0	0	0	0	0	0	0	no	1	no
WBGene00231418	Bm11157a	Bma-rae-1	0	8.80260960029406	0	0	0	0.11860240645218	0	2.93420320009802	0.0395341354840601	no	3.78458298367091	no
WBGene00231420	Bm11159a	Bm11159a	0	0	39.9575964000635	0	6.90895316143054	0.422882963214028	1.96243740609722	2.95713018917592	13.4601597877592	no	0.273657431678294	no
WBGene00224593	Bm4332	Bm4332	0	0	6.58026964743685	0	0	0	1.53410093967205	0.511366979890684	2.19342321581228	no	0.473274877068322	no
WBGene00226759	Bm6498	Bm6498	1	0	0	0	0	64.4929428081409	0	0	21.4976476027136	no	0.0444490916410026	no
WBGene00230495	Bm10234	Bm10234	2	0	0	0	0	0	0	0	0	no	1	no
WBGene00220441	Bm180	Bm180	0	0	0	0	0	0	0	0	0	no	1	no
WBGene00227879	Bm7618	Bma-sym-2	0	19.7506978741404	0	149.580727440254	23.8908500089131	1.62827804557045	25.4163528184837	23.0193002338457	50.4030018286082	no	0.467274271528591	no
WBGene00222856	Bm2595a	Bma-noah-1	2	2.5112657644576	0	0	0	0	0.370190748273513	0.960485504243706	0	no	1.96048550424371	no
WBGene00234009	Bm13748	Bm13748	0	0	0	0	2.18095612351305	0.458878358297126	0	0.72698537450435	0.152959452765709	no	1.49787173379053	no
WBGene00225767	Bm5506	Bma-uba-5	3	0	35.7559158952911	0	0	0.127046084696634	0	0	11.9609873266626	no	0.077154615986921	no
WBGene00225773	Bm5512	Bm5512	3	0	104.104935982785	0	2.74992966639292	0.115718349135271	1.07400882357107	1.27464616332133	34.7402181106402	no	0.063643880299772	no
WBGene00230497	Bm10236a	Bm10236a	0	0	0	0	0.708760114419283	0.119299851739271	0	0.236253371473094	0.0397666172464238	no	1.18897197791079	no
WBGene00223899	Bm3638a	Bm3638a	0	0	0	0	0.484349392912162	0	0	0.161449797637387	0	no	1.16144979763739	no
WBGene00220789	Bm528	Bm528	0	0	67.1592216802521	0	0	0	0	0	22.3864072267507	no	0.0427598814261707	no
WBGene00234308	Bm14047	Bma-pfd-3	0	0	348.183014075669	0	0	352.158134698565	1.72660395333746	0.575534651112488	233.447049591411	no	0.00672021530600745	no
WBGene00223900	Bm3639	Bm3639	0	0	0	0	3.29734187140202	1.38753715251831	12.8780539644177	5.39179861193989	0.462512384172769	no	4.37042358144218	no
WBGene00230498	Bm10237	Bm10237	0	0	0	0	9.10538341824534	0	0	3.03512780608178	0	no	4.03512780608178	no
WBGene00233920	Bm13659	Bma-rab-5.1	0	0	0	0	0	0	0	0	0	no	1	no
WBGene00230093	Bm9832	Bm9832	0	0	0	0	0	0	0	0	0	no	1	no
WBGene00232244	Bm11983	Bma-nars-1.8	1	0	0	0	0	0	0	0	0	no	1	no
WBGene00223901	Bm3640	Bma-rab-5.2	0	0	0	0	0	0	0	0	0	no	1	no
WBGene00268830	Bm17688	Bm17688	0	0	0	0	0	0	0	0	0	no	1	no
WBGene00268831	Bm17689	Bma-nars-1.5	1	0	0	0	0	0	0	0	0	no	1	no
WBGene00230095	Bm9834	Bm9834	0	0	175.285457492594	0	0	0	0	0	58.4284858308645	no	0.0168269473135498	no
WBGene00268832	Bm17690	Bm17690	0	0	0	5384.90618784915	21.1060270017392	2.66445498366073	0	7.03534233391307	1795.85688094427	no	0.00447188778312183	no
WBGene00230096	Bm9835	Bma-cpl-1.2	0	0	0	0	15.4105244258998	1.03757152347129	9.62994183395754	8.3468220866191	0.345857174490432	no	6.94488409600966	no
WBGene00230097	Bm9836	Bma-moag-4	0	0	9167.43619142805	0	28.341632793177	2.14673291381576	17.7105118381942	15.3507148771237	3056.52764144729	no	0.00534769159744508	no
WBGene00234941	Bm14756a	Bma-smn-1	1	27.2073049937762	278.718318856217	0	16.8782981027936	1.28302650822021	13.6092187972048	19.2316072979249	93.3337817881458	no	0.214468315744628	no
WBGene00222961	Bm2700	Bm2700	4	0	924.517100074997	0	3.65815324231422	0.410498211895193	0	1.21938441410474	308.309199428964	no	0.00717529390720383	no
WBGene00304249	Bm18586	Bm18586	4	0	0	0	0	0	0	0	0	no	1	no
WBGene00230098	Bm9837a	Bm9837a	5	0	0	0	0	0	0	0	0	no	1	no
WBGene00268833	Bm17691	Bm17691	0	0	0	0	4.44660957221108	0.498974525526972	0	1.48220319073703	0.166324841842324	no	2.12822628969828	no
WBGene00230099	Bm9838	Bm9838	0	4.39386902180244	0	0	4.57227017139505	0.473608135118521	4.39566689149467	4.45393536156405	0.15786937837284	no	4.71032006151548	no
WBGene00223998	Bm3737	Bma-ada-2	0	5.28026600239123	0	0	2.95866140786654	0.355719657594672	5.2824265652495	4.50711799183576	0.118573219198224	no	4.92334153662572	no
WBGene00226014	Bm5753a	Bma-lin-59	0	7.19575183268975	61.7778057251925	0	4.97925345455144	0.723828681401674	2.12148056413237	4.76549528379119	20.8338781355314	no	0.264061897204084	no
WBGene00236660	NA	NA	NA	5614.37706054102	84.1486862917828	0	3115.23057101797	190.992613993939	2368.900623979	3699.502751846	91.7137667619073	NA	39.9131960774395	NA
WBGene00228761	Bm8500a	Bm8500a	1	0	0	0	0	0	0	0	0	no	1	no
WBGene00225651	Bm5390	Bma-hmp-1	0	20.5775146771335	0.810064630598585	0	15.4469067769896	1.10002231953962	15.3143432239464	17.1129215593565	0.636695650046067	no	11.066762203985	no
WBGene00222854	Bm2593	Bma-hpo-27	0	16.6040801195359	0.196093331573337	0	9.06049410101038	0.702020775489418	6.96497049116197	10.8765149039027	0.299371369020918	no	9.14020055163425	no
WBGene00268834	Bm17692	Bm17692	1	0	0	0	0	0	0	0	0	no	1	no
WBGene00228588	Bm8327	Bm8327	0	94.2788314400723	0	0	87.3506653592598	4.56986076407241	62.6988635591328	81.442786786155	1.52328692135747	no	32.6727753741943	no
WBGene00228589	Bm8328	Bm8328	10	0	0	0	1.53075128989887	0.0858863237454514	0.797130880417831	0.775960723438899	0.0286287745818171	no	1.72653222165684	no
WBGene00228590	Bm8329	Bm8329	4	0	0	0	2.20829694280492	0	0	0.736098980934974	0	no	1.73609898093497	no
WBGene00233878	Bm13617	Bma-cle-1	0	0	0	0	2.70047633218008	0.227274658590558	0	0.900158777393358	0.075758219530186	no	1.7663437219408	no
WBGene00231941	Bm11680	Bm11680	3	0	2.26541247759961	0	0.210381619631484	0	0.328665447066167	0.179682355565884	0.755137492533204	no	0.672131021406898	no
WBGene00228353	Bm8092a	Bm8092a	3	16.5560586900479	67.9300522235418	0	11.8425426341396	0.546566265450243	7.1616115932576	11.853404305815	22.8255394963307	no	0.539480094786292	no
WBGene00227507	Bm7246a	Bma-lev-11	0	0.893735745109519	35.51206961788	0	0.572322131756002	0.987427095267293	0.223525360282113	0.563194412382545	12.1664989043824	no	0.118725138986055	no
WBGene00268836	Bm17694	Bm17694	1	0	0	0	0	0	0	0	0	no	1	no
WBGene00268837	Bm17695	Bm17695	0	0	129.62209880553	0	0	267.743157080671	0	0	132.4550852954	no	0.00749315770010952	no
WBGene00227502	Bm7241	Bm7241	0	16.4014055320147	0	0	6.87329901903174	0.603613969938018	6.06913794690042	9.78128083264896	0.201204656646006	no	8.97539047405324	no
WBGene00227235	Bm6974	Bma-lpr-1	2	0	0	0	0	0	0	0	0	no	1	no
WBGene00234785	NA	NA	NA	0	0	0	0	0	0	0	0	no	1	no
WBGene00223565	Bm3304a	Bma-nhr-25.1	0	0	0	0	0	0	0	0	0	no	1	no
WBGene00233607	Bm13346	Bm13346	0	0	0	0	0	0	0	0	0	no	1	no
WBGene00268379	Bm17236	Bma-hif-1.3	0	0	0	0	0	0	0	0	0	no	1	no
WBGene00269693	NA	NA	NA	0	0	0	0	0	0	0	0	no	1	no
WBGene00269694	NA	NA	NA	0	0	0	0	0	0	0	0	no	1	no
WBGene00268380	Bm17237	Bm17237	1	0	0	0	0	0	0	0	0	no	1	no
WBGene00232560	Bm12299	Bm12299	0	0	0	0	0	0	0	0	0	no	1	no
WBGene00268381	Bm17238	Bm17238	0	0	0	0	0	0	0	0	0	no	1	no
WBGene00232598	Bm12337	Bm12337	0	0	0	0	0	0	0	0	0	no	1	no
WBGene00268420	Bm17277	Bm17277	0	0	0	0	0	0	0	0	0	no	1	no
WBGene00269709	NA	NA	NA	0	0	0	0	0	0	0	0	no	1	no
WBGene00269710	NA	NA	NA	0	0	0	0	0	0	0	0	no	1	no
WBGene00269711	NA	NA	NA	0	0	0	0	0	0	0	0	no	1	no
WBGene00269712	NA	NA	NA	0	0	0	0	0	0	0	0	no	1	no
WBGene00269713	NA	NA	NA	0	0	0	0	0	0	0	0	no	1	no
WBGene00268319	Bm17176	Bm17176	0	0	0	0	0	0	0	0	0	no	1	no
WBGene00268320	Bm17177	Bm17177	0	0	0	0	0	0	0	0	0	no	1	no
WBGene00268321	Bm17178	Bm17178	0	0	0	0	0	0	0	0	0	no	1	no
WBGene00268450	Bm17307	Bm17307	1	0	0	0	3.02111336370541	0	0	1.0070377879018	0	no	2.0070377879018	no
WBGene00268451	Bm17308	Bm17308	0	0	0	0	0	0	0	0	0	no	1	no
WBGene00268452	Bm17309	Bm17309	0	0	0	0	0	0	8.33921536437115	2.77973845479038	0	no	3.77973845479038	no
WBGene00231369	Bm11108	Bm11108	0	0	0	0	0	0	0	0	0	no	1	no
WBGene00232630	Bm12369	Bm12369	2	4.12107191025003	0	0	0.329876682467402	0.0555254711854777	0	1.48364953090581	0.0185084903951592	no	2.43851627583606	no
WBGene00224726	Bm4465a	Bm4465a	0	3.95363200676557	0.431508308270073	0	3.7976847921869	0	4.94406217705255	4.23179299200168	0.143836102756691	no	4.57390091062246	no
WBGene00226418	Bm6157	Bma-gsp-2	0	0	0	0	8.9862809536509	1.00839194498257	5.84944962608768	4.94524352657953	0.336130648327522	no	4.44959745068447	no
WBGene00226824	Bm6563	Bm6563	0	0	0	0	1.83493904622492	0.30886043346922	2.86660528150258	1.56718144257584	0.102953477823073	no	2.32755188155601	no
WBGene00235002	Bm14817	Bm14817	0	0	0	0	0	0	0	0	0	no	1	no
WBGene00235010	Bm14675	Bm14675	0	0	0	0	0	0	0	0	0	no	1	no
WBGene00224605	Bm4344a	Bma-mrpl-40	0	0	0	0	0	0	0	0	0	no	1	no
WBGene00220981	Bm720a	Bm720a	0	0	0	0	0	0	0.79837611946334	0.266125373154447	0	no	1.26612537315445	no
WBGene00224381	Bm4120	Bm4120	0	0	21.5359759203985	0	0	0.298804512379524	0	0	7.27826014425933	no	0.120798329911565	no
WBGene00224382	Bm4121	Bm4121	0	0	797.894504402917	0	0	268.797701024396	0	0	355.564068475771	no	0.00280454506892623	no
WBGene00226643	Bm6382	Bma-unc-71	2	0	0.304196428145955	0	1.36188161147113	0.0382057509138256	1.06378929268963	0.808556968053586	0.114134059686594	no	1.6232848752172	no
WBGene00226644	Bm6383a	Bma-cox-5A	0	43.1737327561135	76.4828596399116	0	3.89953840730303	0.328188864171636	4.56899539120718	17.2140888515412	25.6036828346944	no	0.684645391569165	no
WBGene00233602	Bm13341	Bma-hum-5	0	0	0	0	0.364592251184318	0	0.284789316296388	0.216460522493569	0	no	1.21646052249357	no
WBGene00228355	Bm8094a	Bm8094a	1	3726.650329979	3155.69779357404	0	1.8443974949168	505.85129952307	1.72882895843197	1243.40785214411	1220.5163643657	no	1.01874022194561	no
WBGene00226558	Bm6297	Bm6297	1	0	0	0	0.42525606865157	0	0	0.141752022883857	0	no	1.14175202288386	no
WBGene00221435	Bm1174	Bm1174	2	0	0	0	0	0	0	0	0	no	1	no
WBGene00226490	Bm6229a	Bma-scyl-1	0	0	0	0	1.52666928645914	0	0.596253898552538	0.707641061670558	0	no	1.70764106167056	no
WBGene00229129	Bm8868a	Bm8868a	0	0	0	0	0	0	1.01088538889947	0.336961796299823	0	no	1.33696179629982	no
WBGene00234816	NA	NA	NA	0	472.586071869424	0	0	0	49.6878248793781	16.562608293126	157.528690623141	no	0.110785046063847	no
WBGene00232585	Bm12324	Bma-scav-3	3	9.86612755522096	0.352803513457242	0	27.3779065050724	1.01914356619157	23.4416407983639	20.2285582862191	0.457315693216271	no	14.5668906092461	no
WBGene00234801	NA	NA	NA	0	0	0	0	0	0	0	0	no	1	no
WBGene00223497	Bm3236	Bma-rpc-2	0	0	0.401864313678741	0	2.99856478943133	0.504724133782357	5.15290785707313	2.71715754883482	0.302196149153699	no	2.85452967377504	no
WBGene00221409	Bm1148a	Bm1148a	0	16.9682569400686	0	0	1.35824669613802	0.457245339228453	2.12189999484889	6.81613454368518	0.152415113076151	no	6.78239503716808	no
WBGene00223057	Bm2796	Bm2796	12	11.9119967444636	0	0	2.06353136263907	0.694675054687247	4.83558016397642	6.27036942369304	0.231558351562416	no	5.90339013532691	no
WBGene00227557	Bm7296	Bma-sas-1	3	24.4598052937198	0.989979111807941	0	23.2340284559412	0.977698975192355	18.1485016680544	21.9474451392385	0.655892695666765	no	13.8580508261729	no
WBGene00226667	Bm6406a	Bm6406a	0	9.72700294497727	0	0	8.26053521731396	1.85390535135673	7.16938555373792	8.38564123867639	0.617968450452242	no	5.80088025576332	no
WBGene00234972	Bm14787	Bm14787	0	44.5971494647236	21.7354129870589	0	9.01322884892939	1.08365988464882	6.03461915881118	19.8816658241547	7.60635762390256	no	2.42630700892092	no
WBGene00268453	Bm17310	Bm17310	0	0	0	0	5.72500982422176	1.92728910484793	0	1.90833660807392	0.642429701615977	no	1.77075256567293	no
WBGene00268454	Bm17311	Bm17311	1	2.21340438211668	0	0	0.208856211381158	0.0351550751032501	0.163141200753123	0.861800598083652	0.01171835836775	no	1.84023605253875	no
WBGene00228939	Bm8678	Bm8678	0	0	0	0	7.41787483008835	1.60533104522271	3.31098879344306	3.57628787451047	0.53511034840757	no	2.98108072768686	no
WBGene00223311	Bm3050	Bm3050	0	0	0	0	1.42946562402541	8.78227869250306	4.46632133747219	1.9652623204992	2.92742623083435	no	0.755014135521841	no
WBGene00223309	Bm3048	Bm3048	0	0	0	0	10.2520487649801	1.15042957676215	6.52507997089496	5.59237624529169	0.383476525587385	no	4.76507994415934	no
WBGene00226592	Bm6331a	Bm6331a	1	7.51470480718563	1.62632831158571	0	13.2335399141454	0.40499902387138	10.3369470198233	10.3617305803848	0.677109111819029	no	6.77459236272445	no
WBGene00224973	Bm4712	Bma-sgcb-1	1	126.822792131021	0.921060211988863	0	39.8555256199509	2.04667869541373	20.051016057519	62.2431112694969	0.989246302467532	no	31.792499094279	no
WBGene00227742	Bm7481a	Bma-ced-11	4	3.97424679058053	0.704034750539402	0	1.20481228920112	0	0.537771272651669	1.90561011747777	0.234678250179801	no	2.3533338479516	no
WBGene00236131	NA	NA	NA	0	0	0	0	0	0	0	0	no	1	no
WBGene00225290	Bm5029a	Bma-clip-1	1	0	0	0	3.17923633165168	4.80283762765797	2.8558599889022	2.01169877351796	1.60094587588599	no	1.15792443104647	no
WBGene00236688	NA	NA	NA	0	0	0	0	0	0	0	0	no	1	no
WBGene00222583	Bm2322a	Bm2322a	0	0	0	0	2.98722140580316	0.201125917542179	1.86669626470922	1.61797255683746	0.0670419725140597	no	2.45348601486524	no
WBGene00233062	Bm12801a	Bm12801a	1	0	0	0	0	0	1.94114128666046	0.647047095553486	0	no	1.64704709555349	no
WBGene00225475	Bm5214	Bma-rfp-1	0	44.543961424284	225.941362592556	0	27.2392521671072	1.74228585664854	25.5324614581793	32.4385583498568	75.8945494830682	no	0.434862530239804	no
WBGene00268455	Bm17312	Bm17312	0	0	0	0	3.9145366319465	0	0	1.30484554398217	0	no	2.30484554398217	no
WBGene00221839	Bm1578	Bm1578	0	5.29982978898772	200.81155735122	0	3.8180873225636	0.285630100755529	92.7849712456709	33.9676294524074	67.0323958173253	no	0.513984977778814	no
WBGene00268456	Bm17313	Bm17313	0	9.84801418277304	0	0	1.57659478808172	0.199031577092729	7.38903282199358	6.27121393094945	0.0663438590309098	no	6.81882665649475	no
WBGene00221652	Bm1391	Bm1391	0	0	0	0	0	0	0	0	0	no	1	no
WBGene00234869	NA	NA	NA	0	0	0	0	0	0	0	0	no	1	no
WBGene00227129	Bm6868a	Bma-ntl-3	0	4.7056468406758	0.273118960893881	0	3.26066235427777	0.823261342286203	3.18369973419527	3.71666964304961	0.365460101060028	no	3.45427130341486	no
WBGene00220799	Bm538a	Bm538a	0	0	0	0	0	0	8.55866840027566	2.85288946675855	0	no	3.85288946675855	no
WBGene00234493	Bm14232	Bm14232	6	0	0	0	4.87234878657171	0.820123023339545	5.70881392231153	3.52705423629441	0.273374341113182	no	3.55516370177278	no
WBGene00233759	Bm13498a	Bm13498a	2	0	0	0	2.88232086807892	0.970315471289078	13.5085842340411	5.46363503404002	0.323438490429693	no	4.88397086890031	no
WBGene00226235	Bm5974a	Bma-mtm-3	1	0	0	0	12.0791416071492	35.9195859540889	7.33850952064662	6.47255037593194	11.9731953180296	no	0.575999219370951	no
WBGene00231681	Bm11420	Bm11420	0	0	0	0	2.09037328132241	0.17592780509794	1.63282674181434	1.24106667437892	0.0586426016993133	no	2.11692470223813	no
WBGene00230542	Bm10281	Bm10281	0	9.80078150084128	0	0	3.13806636476698	0.132051326128669	6.74079433101533	6.55988073220786	0.0440171087095565	no	7.24114640377125	no
WBGene00222118	Bm1857	Bma-agmo-1	9	5.21481611391828	31.5615507257527	0	1.25228067609663	0.0702620891304386	0.652118737024285	2.3730718423464	10.543937604961	no	0.292194219838542	no
WBGene00233995	Bm13734	Bma-mcm-5	0	0	0	0	0.981149927030293	0	0.766393185800177	0.58251437094349	0	no	1.58251437094349	no
WBGene00221016	Bm755	Bma-rpom-1	0	11.3600773385793	0	0	19.7937046759654	3.00929011212837	22.942433570403	18.0320718616492	1.00309670404279	no	9.50132453577371	no
WBGene00234870	NA	NA	NA	0	87.9547639054154	0	161.267882372444	0	100.775306797612	87.347729723352	29.3182546351385	no	2.91401107308328	no
WBGene00232433	Bm12172a	Bm12172a	0	21.6820189328437	0	0	4.96675230557122	0.334405281350133	2.58641078030308	9.74506067290601	0.111468427116711	no	9.66744570583984	no
WBGene00228809	Bm8548a	Bma-mys-1	0	0	0	0	7.26754658739671	0.733972366175029	5.6768063968823	4.314784328093	0.244657455391676	no	4.27007792792316	no
WBGene00234379	Bm14118	Bm14118	1	0	0	0	0	0	0	0	0	no	1	no
WBGene00269714	NA	NA	NA	0	0	0	0	0	0	0	0	no	1	no
WBGene00268458	Bm17315	Bm17315	0	0	0	0	4.02107801525672	0	18.8456017101768	7.6222265751445	0	no	8.6222265751445	no
WBGene00268459	Bm17316	Bm17316	0	0	0	0	0	0	0	0	0	no	1	no
WBGene00268460	Bm17317	Bm17317	1	0	0	0	0	0	0	0	0	no	1	no
WBGene00223702	Bm3441a	Bm3441a	3	5.68192278072606	0	0	0.454817066472434	0.153111348945218	0.710530961532319	2.28242360291027	0.0510371163150726	no	3.12303300421818	no
WBGene00221795	Bm1534a	Bm1534a	3	0	0	0	0	0	0	0	0	no	1	no
WBGene00226079	Bm5818	Bma-nmt-1	2	0	0	0	0.640202384592872	0	0	0.213400794864291	0	no	1.21340079486429	no
WBGene00234036	Bm13775a	Bma-ykt-6	0	0	1.38220191174956	0	0	0	0	0	0.460733970583185	no	0.684587351385248	no
WBGene00222037	Bm1776a	Bma-algn-11	2	0	1.4154098452594	0	0	0	0	0	0.471803281753135	no	0.679438626342002	no
WBGene00233449	Bm13188	Bm13188	0	0	4963.14706653397	0	0	3317.05904650891	0	0	2760.06870434763	no	0.000362178600780698	no
WBGene00226896	Bm6635a	Bma-kvs-4	4	0	0	0	0	0	0	0	0	no	1	no
WBGene00268461	Bm17318	Bm17318	0	0	0	0	1.51857024515166	0	0	0.50619008171722	0	no	1.50619008171722	no
WBGene00227396	Bm7135	Bm7135	0	5.24156856008716	2.25897900500841	0	0.419568327169055	660.603235131826	0	1.8870456290854	220.954071378945	no	0.0130074010859495	no
WBGene00229149	Bm8888	Bma-lron-11.1	1	0	0	0	0	0	0	0	0	no	1	no
WBGene00227744	Bm7483	Bma-eat-4	11	0	0	0	0.333091480681993	0	0	0.111030493560664	0	no	1.11103049356066	no
WBGene00228927	Bm8666a	Bm8666a	1	0	6.83644808760624	0	0.0702886411813598	0.0118311178934802	0.109807347799731	0.0600319963270302	2.28275973516657	no	0.322908796818553	no
WBGene00234355	Bm14094	Bm14094	1	0	0	0	0	0	0	0	0	no	1	no
WBGene00228117	Bm7856	Bm7856	1	0	0	0	0.379768479218691	0.191770060183874	2.37314984498522	0.917639441401305	0.0639233533946246	no	1.80242254790513	no
WBGene00221056	Bm795	Bm795	4	0	0	0	0	0	0	0	0	no	1	no
WBGene00220620	Bm359	Bm359	0	0	0	0	0	0	0	0	0	no	1	no
WBGene00222611	Bm2350a	Bma-gbf-1	0	0	0	0	0	0.0269174455984348	0.249827052466147	0.0832756841553823	0.00897248186614493	no	1.07364244677101	no
WBGene00222610	Bm2349	Bma-immp-1	1	0	0	0	0	0	0	0	0	no	1	no
WBGene00229596	Bm9335a	Bm9335a	0	0	0	0	0.410247927210445	0	0	0.136749309070148	0	no	1.13674930907015	no
WBGene00229595	Bm9334	Bm9334	0	0	0	0	1.22460103191909	0	0	0.408200343973031	0	no	1.40820034397303	no
WBGene00228737	Bm8476	Bma-cdh-1	0	0.676937110477205	0	0	0.12775118851294	0.0107516616264424	0	0.268229432996715	0.00358388720881413	no	1.26370047303563	no
WBGene00268463	Bm17320	Bm17320	0	0	0	0	0	0	0	0	0	no	1	no
WBGene00225850	Bm5589	Bm5589	1	0	0	0	0	0	0	0	0	no	1	no
WBGene00234787	NA	NA	NA	0	0	0	0	0	0	0	0	no	1	no
WBGene00234786	NA	NA	NA	0	0	0	0	0	0	0	0	no	1	no
WBGene00228648	Bm8387	Bm8387	0	0	0	0	0	0	0	0	0	no	1	no
WBGene00228649	Bm8388	Bm8388	0	0	0	0	1.17556669901884	0	0.91825549058399	0.697940729867611	0	no	1.69794072986761	no
WBGene00223758	Bm3497	Bma-sax-2	0	0	10.5936533250819	0	0.120593166207046	0	0	0.0401977220690154	3.5312177750273	no	0.229562509178396	no
WBGene00223759	Bm3498	Bm3498	0	0	0	0	0	12.9819551228828	0	0	4.32731837429427	no	0.187711702162436	no
WBGene00229633	Bm9372	Bm9372	0	0	0	0	0	0	0	0	0	no	1	no
WBGene00221059	Bm798	Bm798	0	0	0	0	0	0	0	0	0	no	1	no
WBGene00234814	NA	NA	NA	0	43.9773819527077	0	0	0	0	0	14.6591273175692	no	0.0638605191540923	no
WBGene00225831	Bm5570	Bma-tre-2	0	716.525758939875	3188.06534642958	0	7.89419819886693	12699.8877326829	0	241.473319046247	5295.98435970416	no	0.0457757287128916	no
WBGene00224281	Bm4020	Bm4020	1	0	0	0	0	0	0	0	0	no	1	no
WBGene00222460	Bm2199	Bm2199	0	0	0	0	0	0	0	0	0	no	1	no
WBGene00225340	Bm5079	Bma-chl-1	0	0	0	0	0.301355958637808	0	0	0.100451986212603	0	no	1.1004519862126	no
[truncated: 9,710 more rows]
